# Supplementary material for: AP39, a novel mitochondria-targeted hydrogen sulfide donor ameliorates doxorubicin-induced cardiotoxicity by regulating the AMPK/UCP2 pathway
Source: PubMed Central journal article supplement (PMC10990198; doi:10.1371/journal.pone.0300261), 2024-04-03

FIG.2

Bax+GAPDH

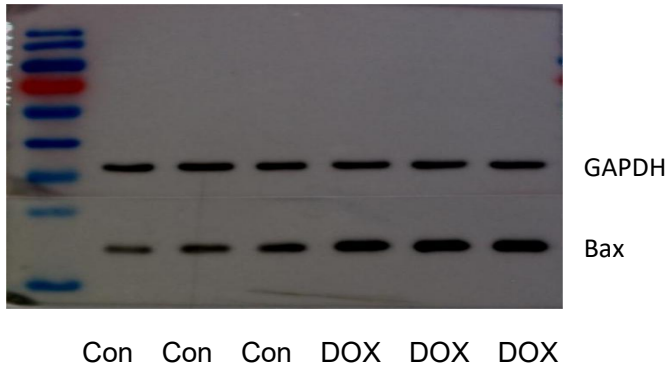

Bcl-2+GAPDH

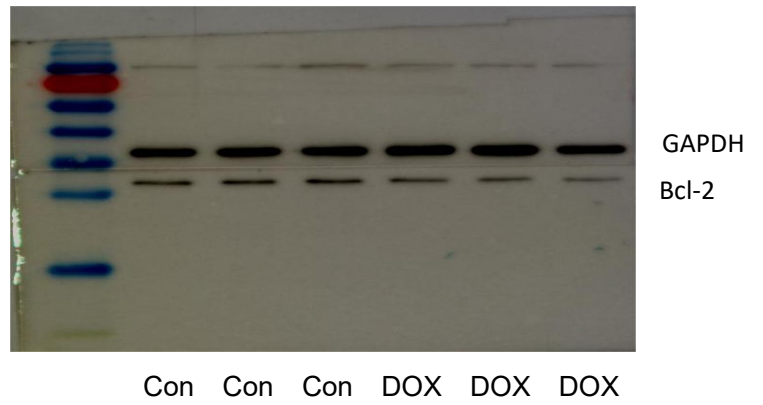

Caspase-3

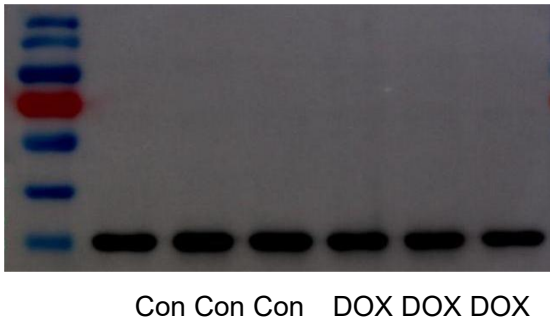

GAPDH

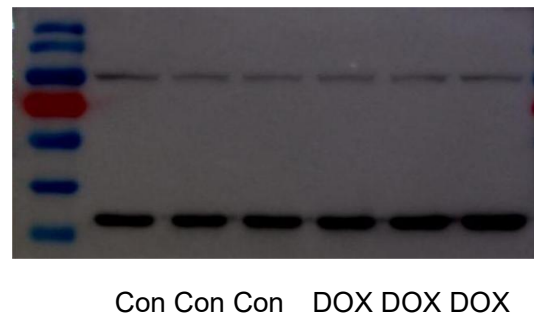

Cleaved Caspase-3

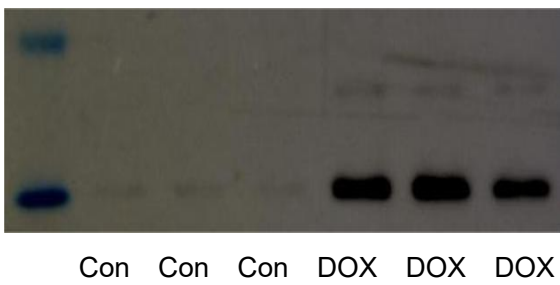

AMPK

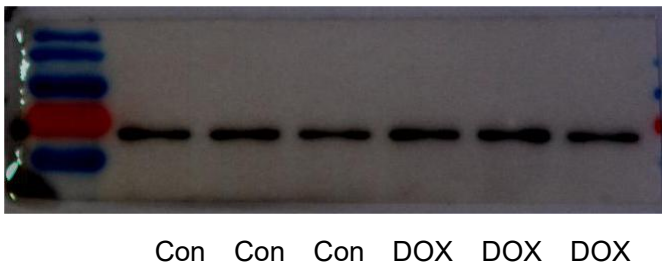

GAPDH

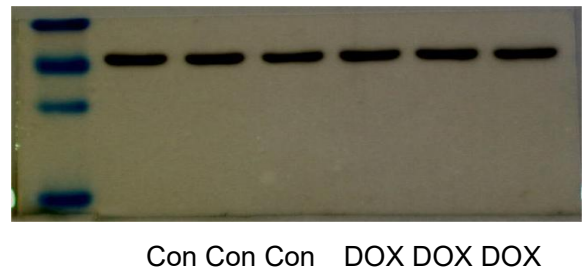

AMPK+GAPDH

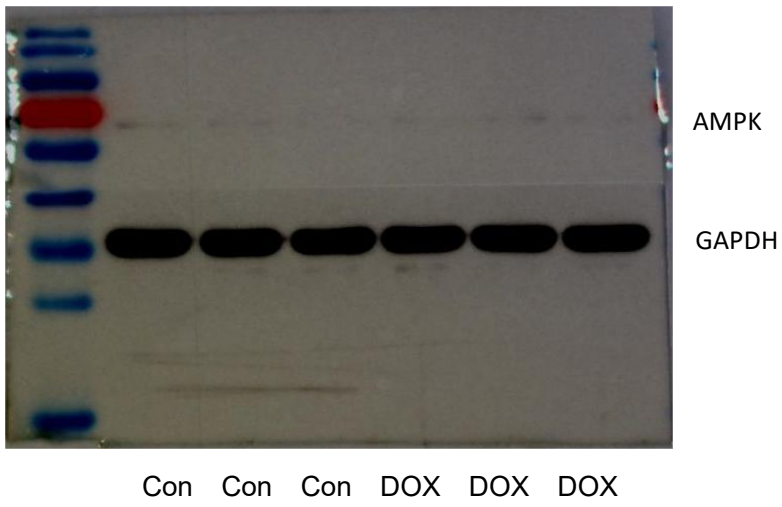

P-AMPK

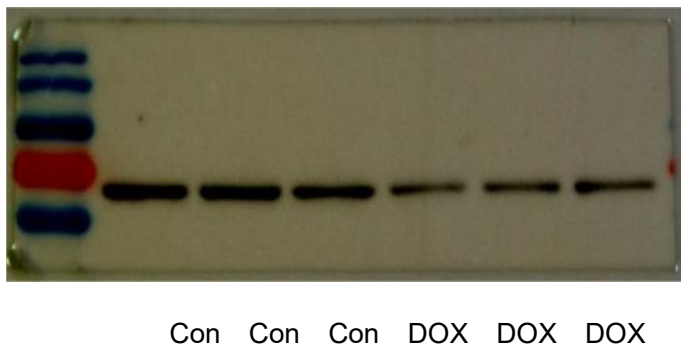

P-AMPK+GAPDH

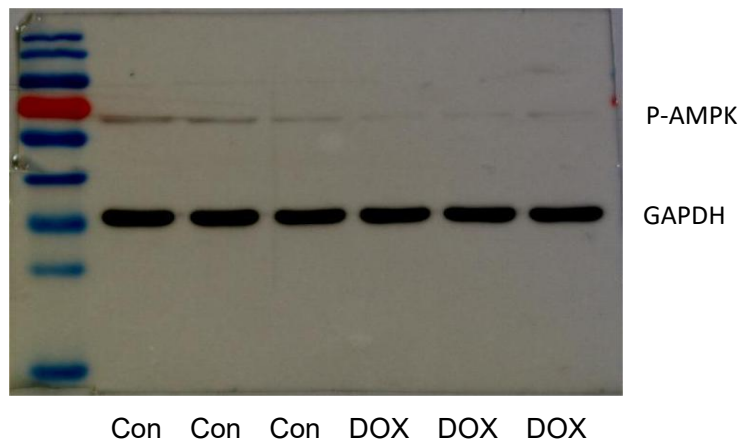

UCP2

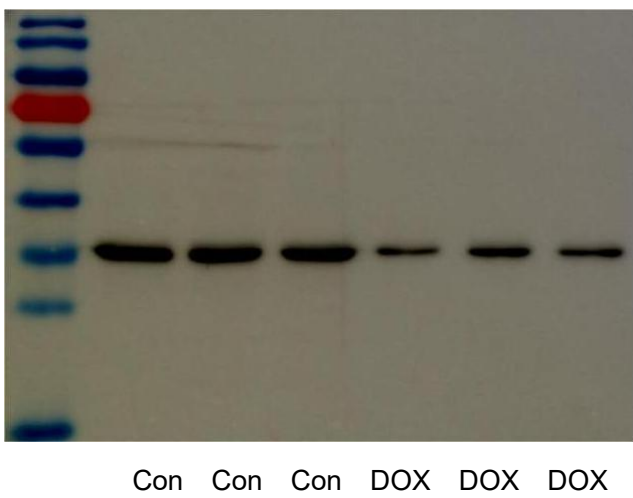

GAPDH

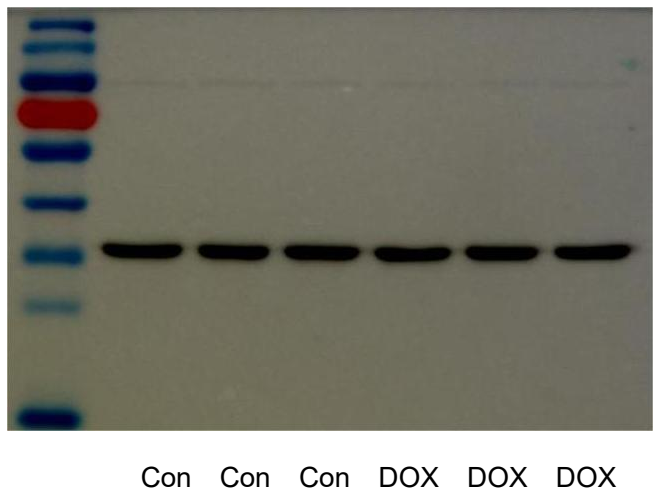

FIG.4

Bax Repeat1

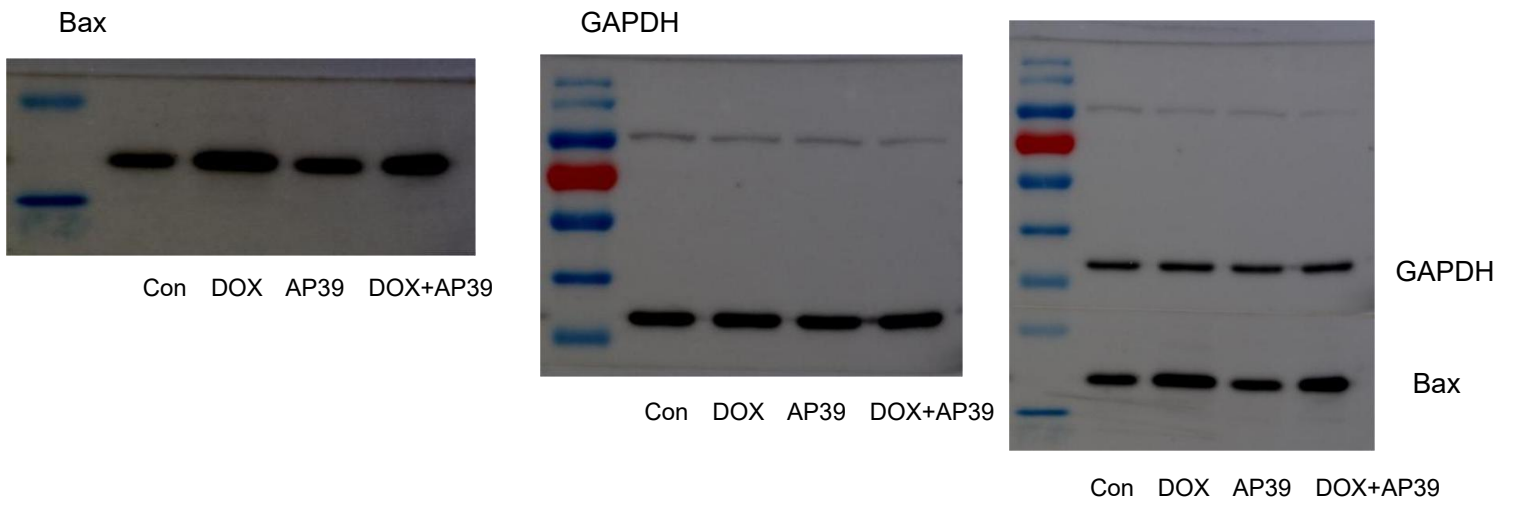

Bax Repeat2+Bax Repeat3

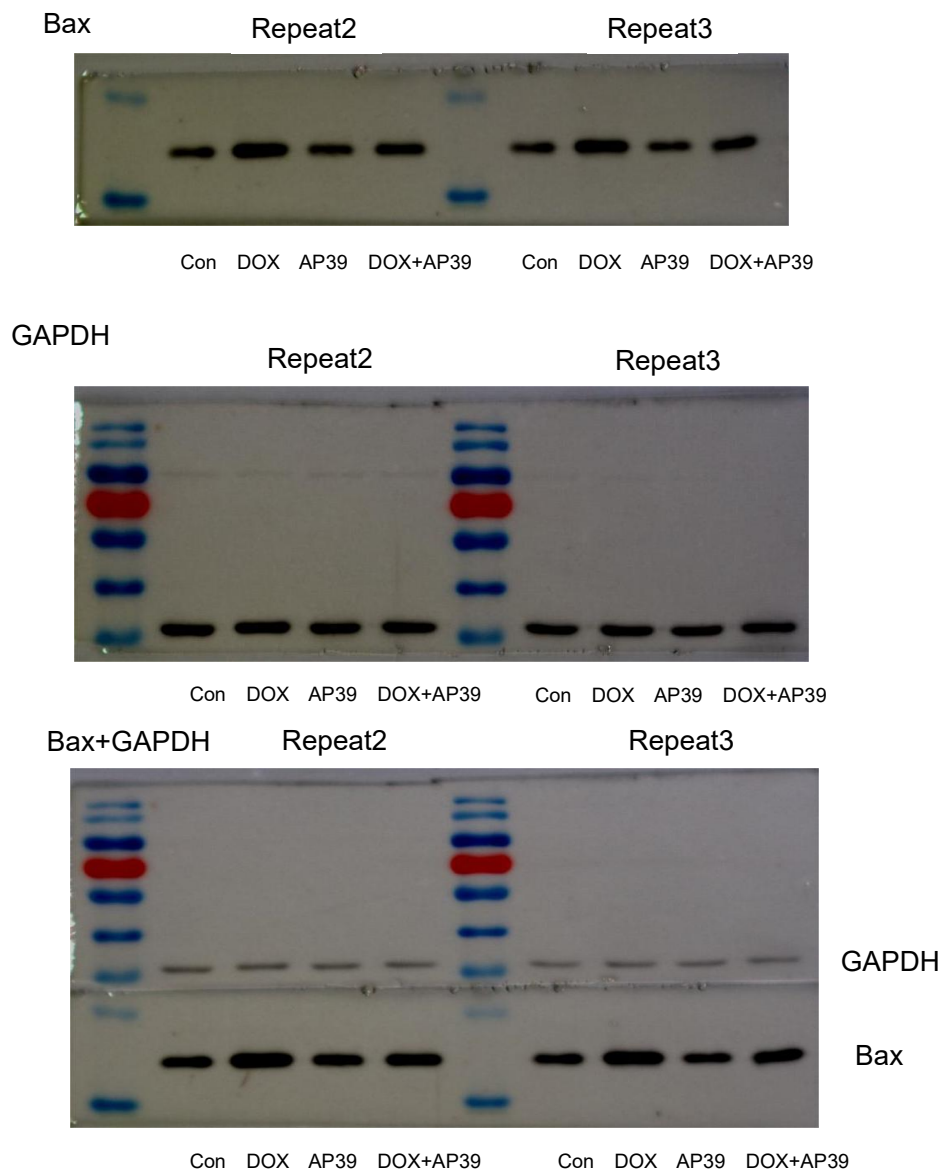

Bcl-2 Repeat1+Bcl-2 Repeat2

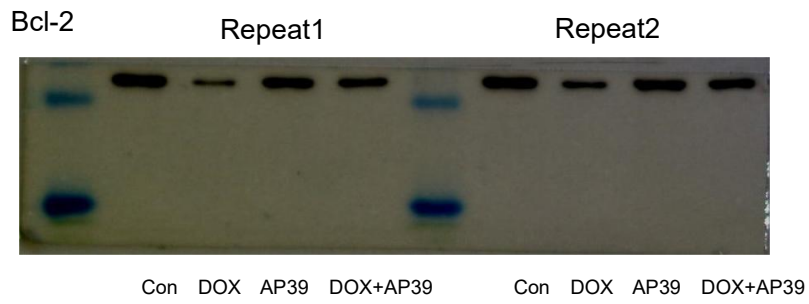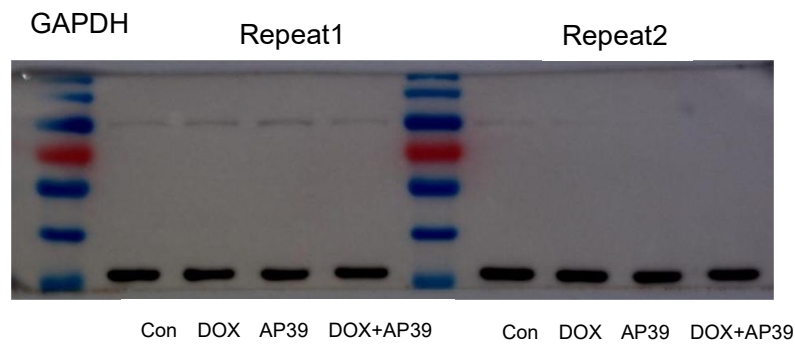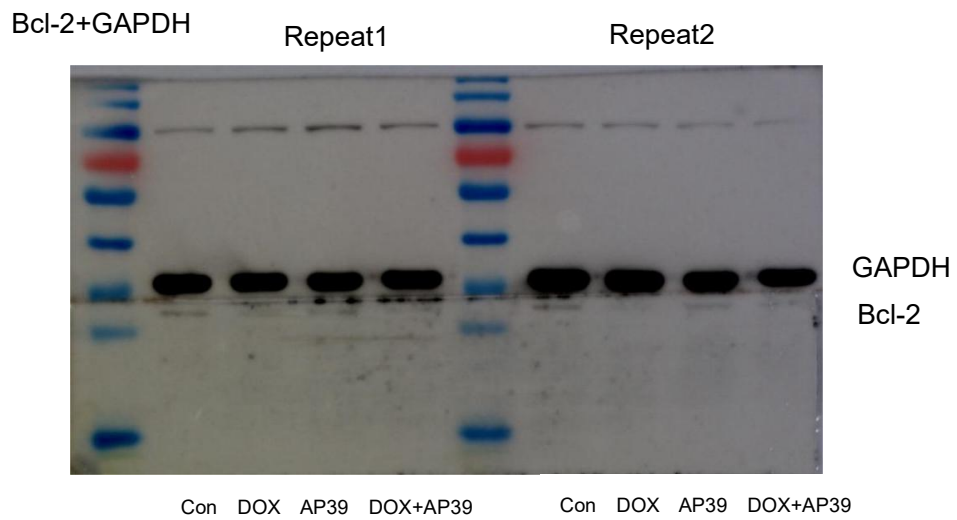

Bcl-2 Repeat3

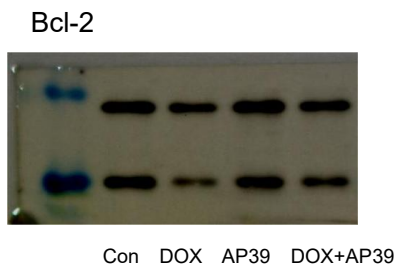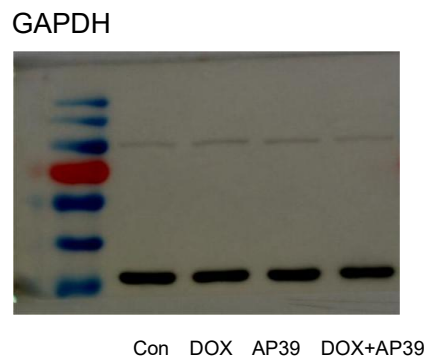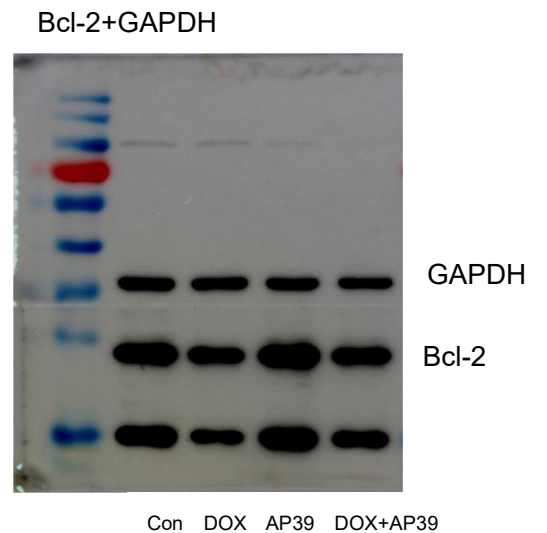

### Cleaved Caspase-3 and Caspase-3 Repeat1+Repeat2

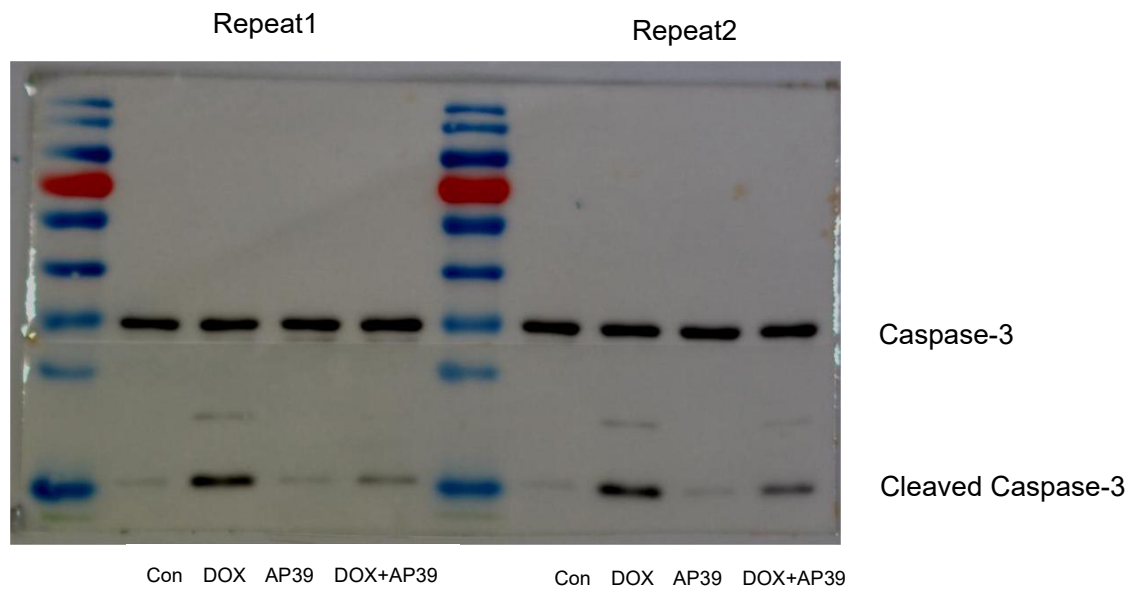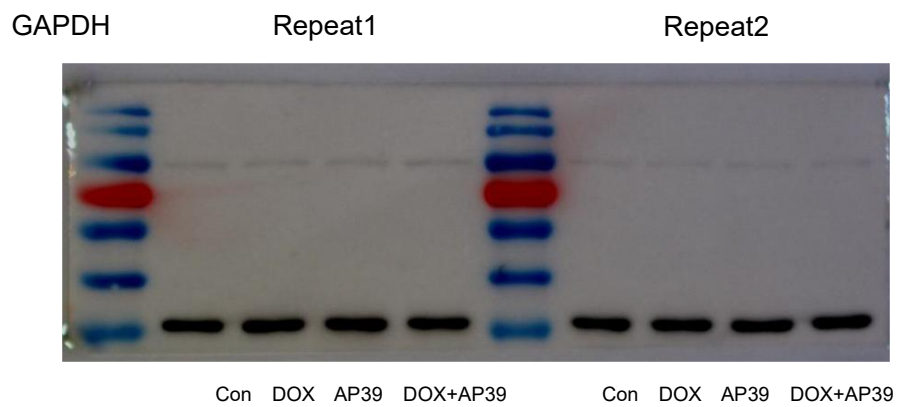

### Cleaved Caspase-3 and Caspase-3 Repeat3+Repeat4

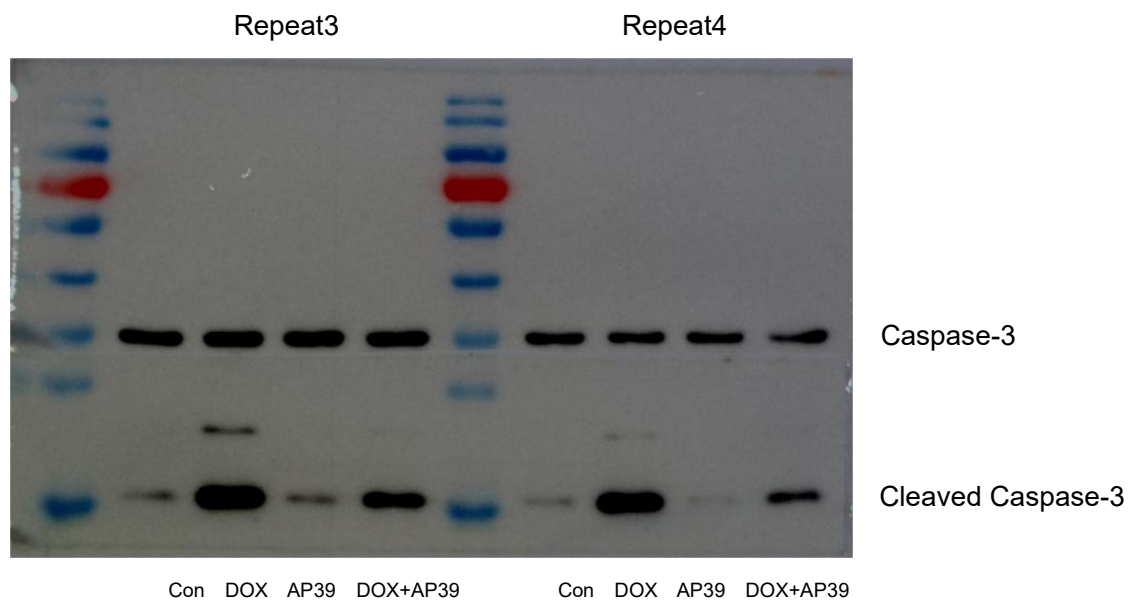



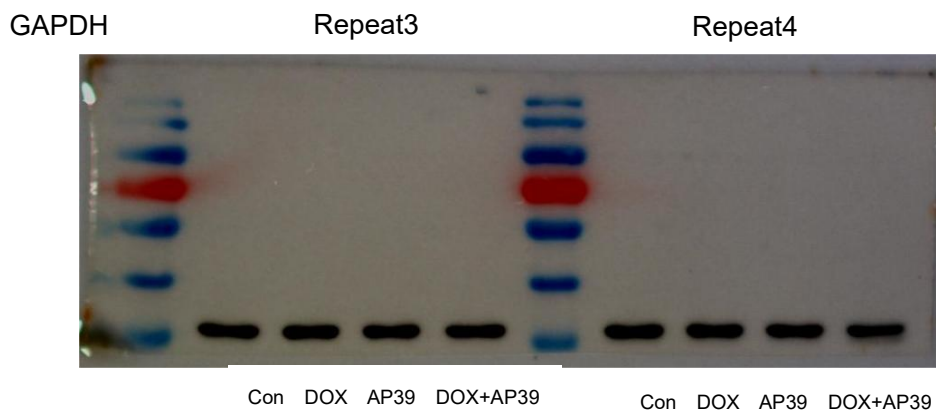

p-AMPK and AMPK Repeat1

AMPK

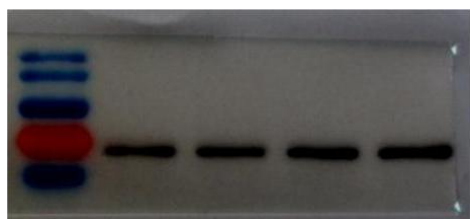

AMPK+GAPDH

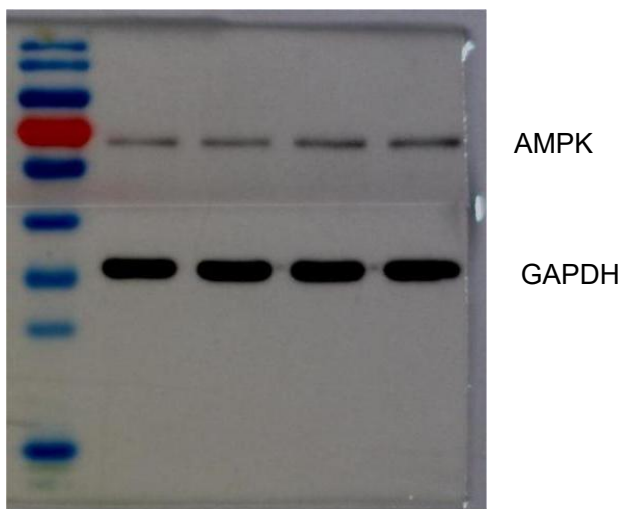

P-AMPK

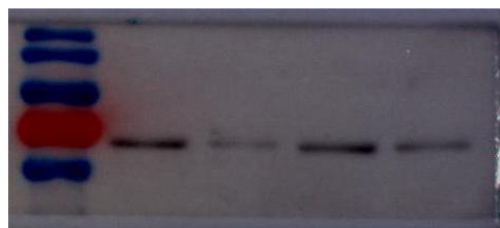

P-AMPK+GAPDH

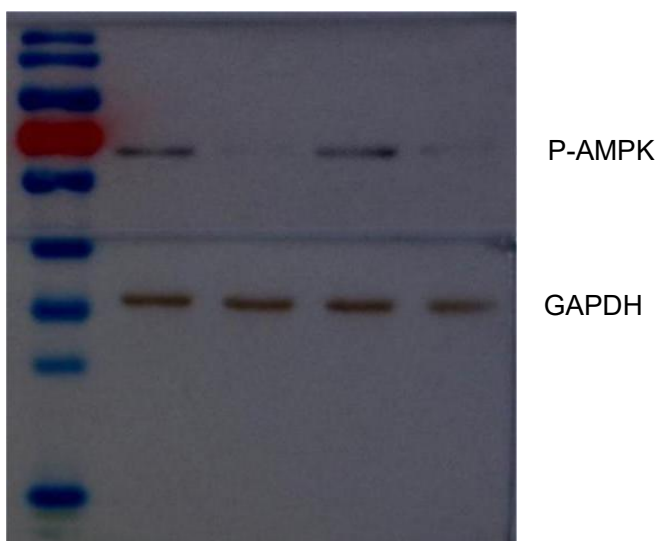

p-AMPK and AMPK Repeat2+Repeat3

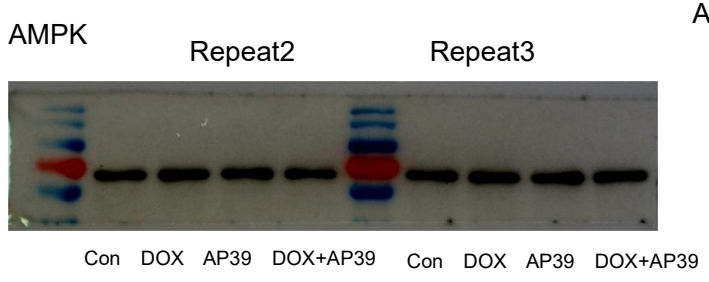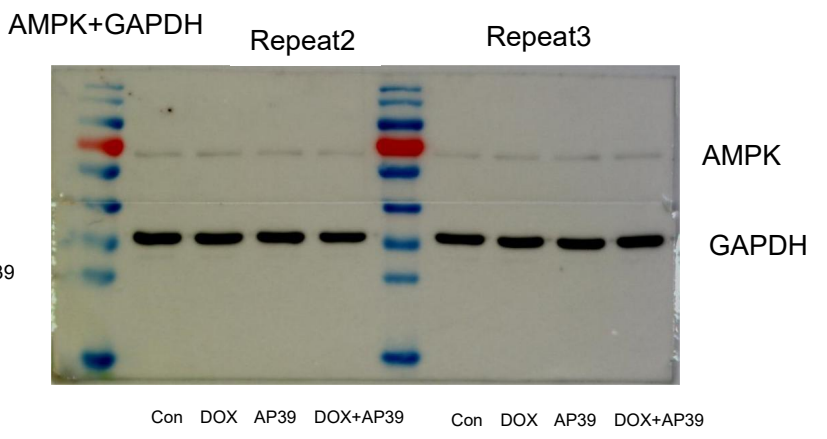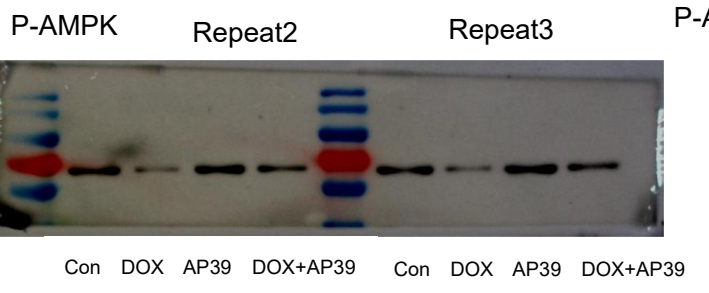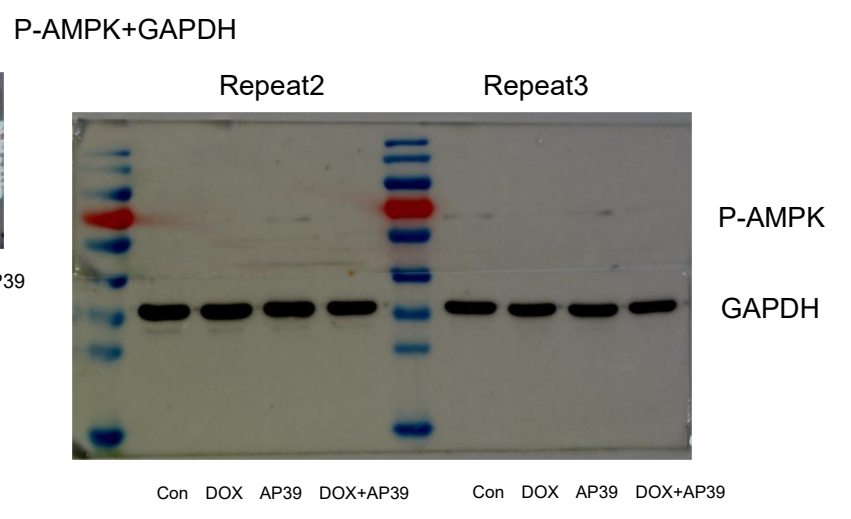

UCP2 Repeat1+Repeat2

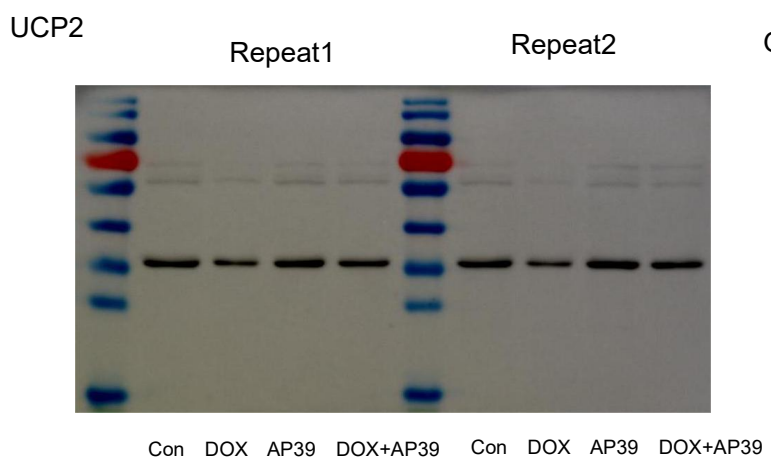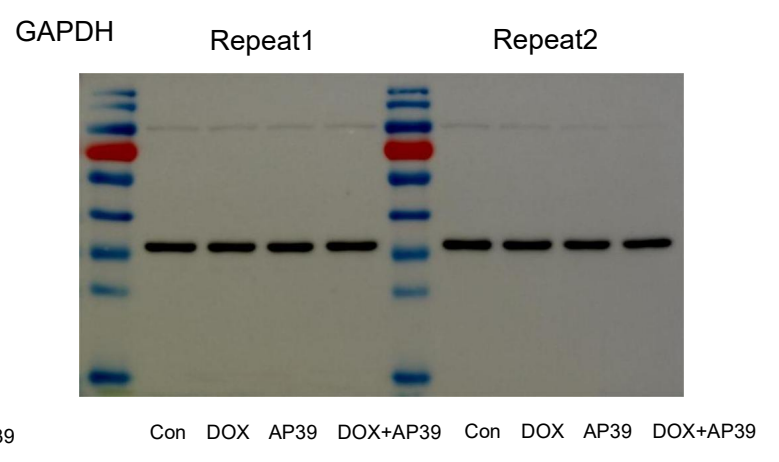

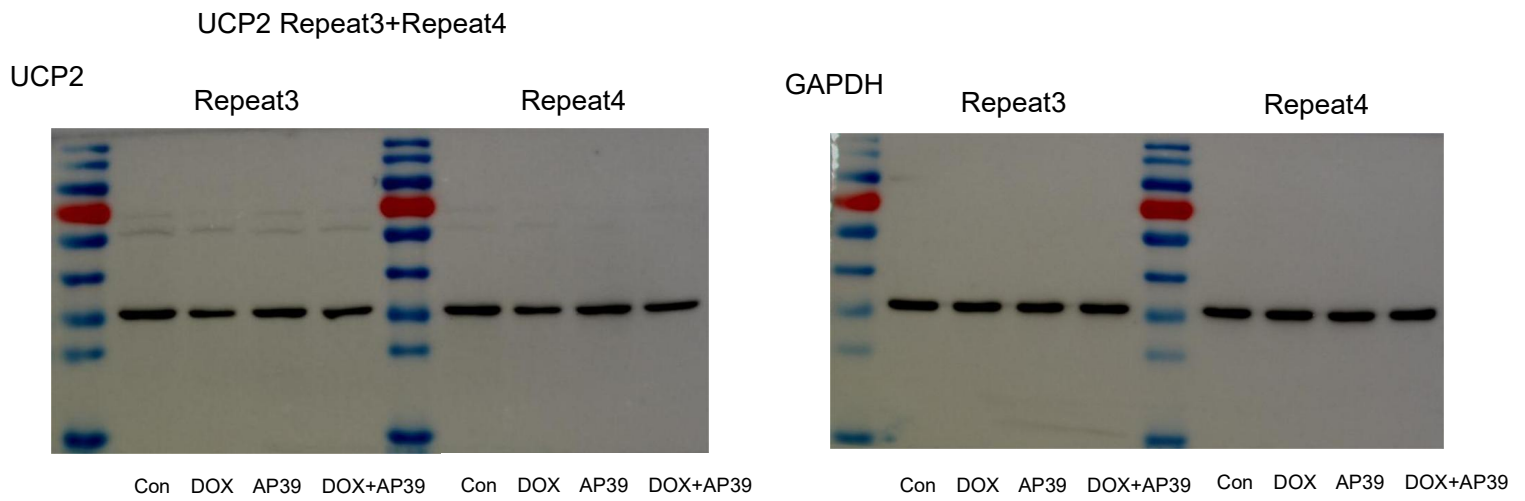

FIG.5

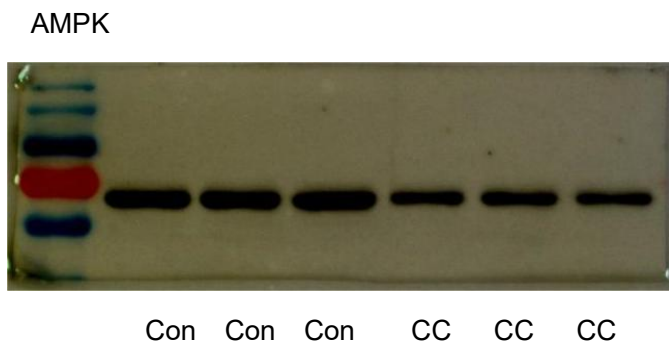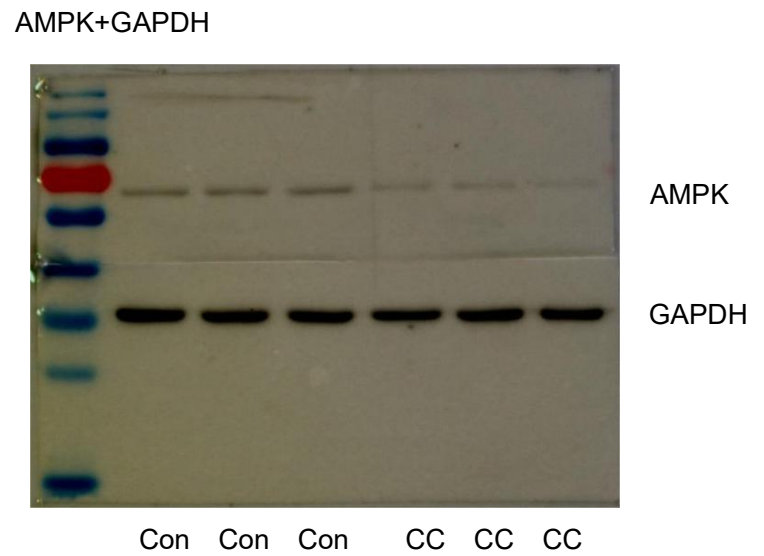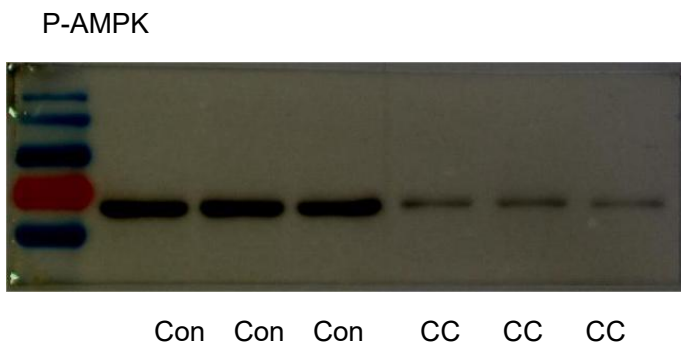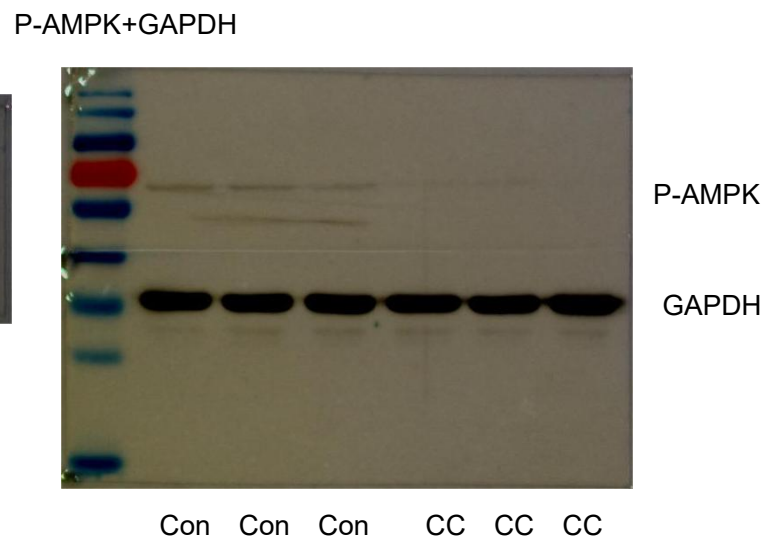



### Bax Repeat1

Bax

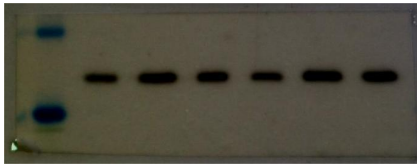

|      |   |   |   |   |   |   |
|------|---|---|---|---|---|---|
| DOX  | - | + | + | - | + | + |
| AP39 | - | - | + | - | - | + |
| CC   | - | - | - | + | + | + |

GAPDH

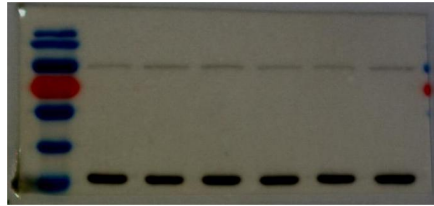

|      |   |   |   |   |   |   |
|------|---|---|---|---|---|---|
| DOX  | - | + | + | - | + | + |
| AP39 | - | - | + | - | - | + |
| CC   | - | - | - | + | + | + |

Bax+GAPDH

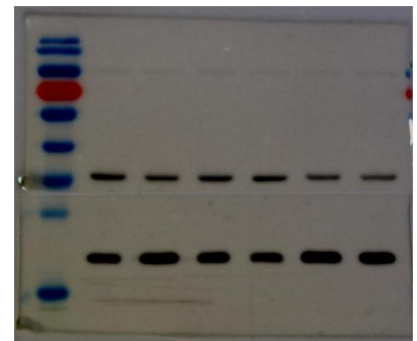

|      |   |   |   |   |   |   |
|------|---|---|---|---|---|---|
| DOX  | - | + | + | - | + | + |
| AP39 | - | - | + | - | - | + |
| CC   | - | - | - | + | + | + |

### Bax Repeat2

Bax

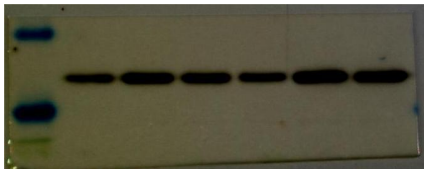

|      |   |   |   |   |   |   |
|------|---|---|---|---|---|---|
| DOX  | - | + | + | - | + | + |
| AP39 | - | - | + | - | - | + |
| CC   | - | - | - | + | + | + |

GAPDH

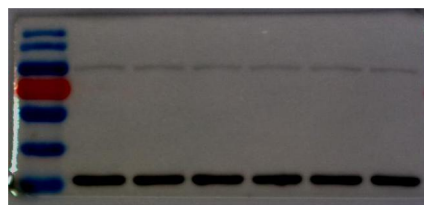

|      |   |   |   |   |   |   |
|------|---|---|---|---|---|---|
| DOX  | - | + | + | - | + | + |
| AP39 | - | - | + | - | - | + |
| CC   | - | - | - | + | + | + |

Bax+GAPDH

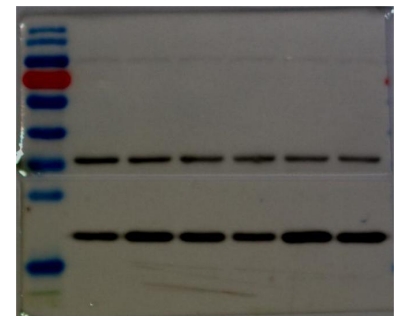

|      |   |   |   |   |   |   |
|------|---|---|---|---|---|---|
| DOX  | - | + | + | - | + | + |
| AP39 | - | - | + | - | - | + |
| CC   | - | - | - | + | + | + |

### Bax Repeat3

Bax

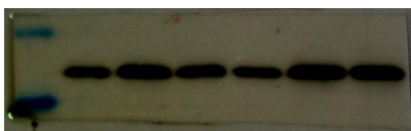

|      |   |   |   |   |   |   |
|------|---|---|---|---|---|---|
| DOX  | - | + | + | - | + | + |
| AP39 | - | - | + | - | - | + |
| CC   | - | - | - | + | + | + |

GAPDH

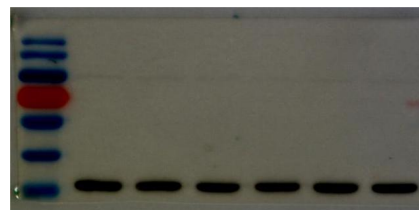

|      |   |   |   |   |   |   |
|------|---|---|---|---|---|---|
| DOX  | - | + | + | - | + | + |
| AP39 | - | - | + | - | - | + |
| CC   | - | - | - | + | + | + |

Bax+GAPDH

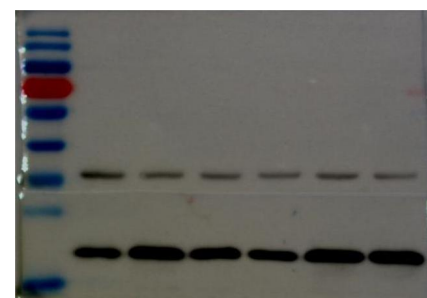

|      |   |   |   |   |   |   |
|------|---|---|---|---|---|---|
| DOX  | - | + | + | - | + | + |
| AP39 | - | - | + | - | - | + |
| CC   | - | - | - | + | + | + |

### Bcl-2 Repeat1

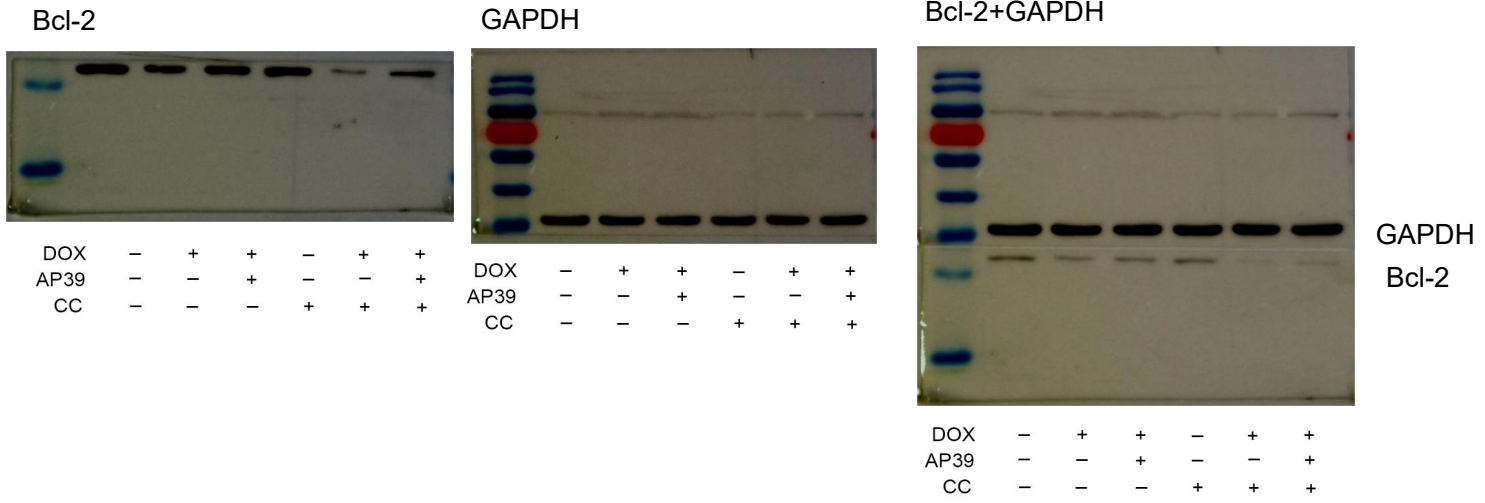

### Bcl-2 Repeat 2

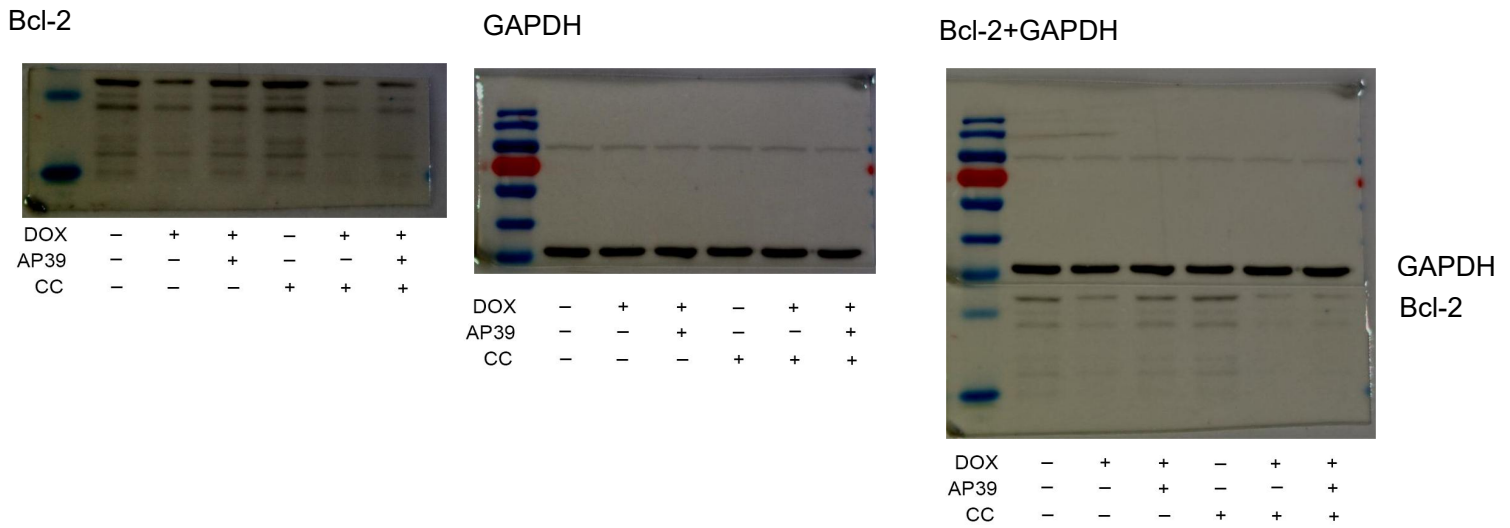

### Bcl-2 Repeat 3

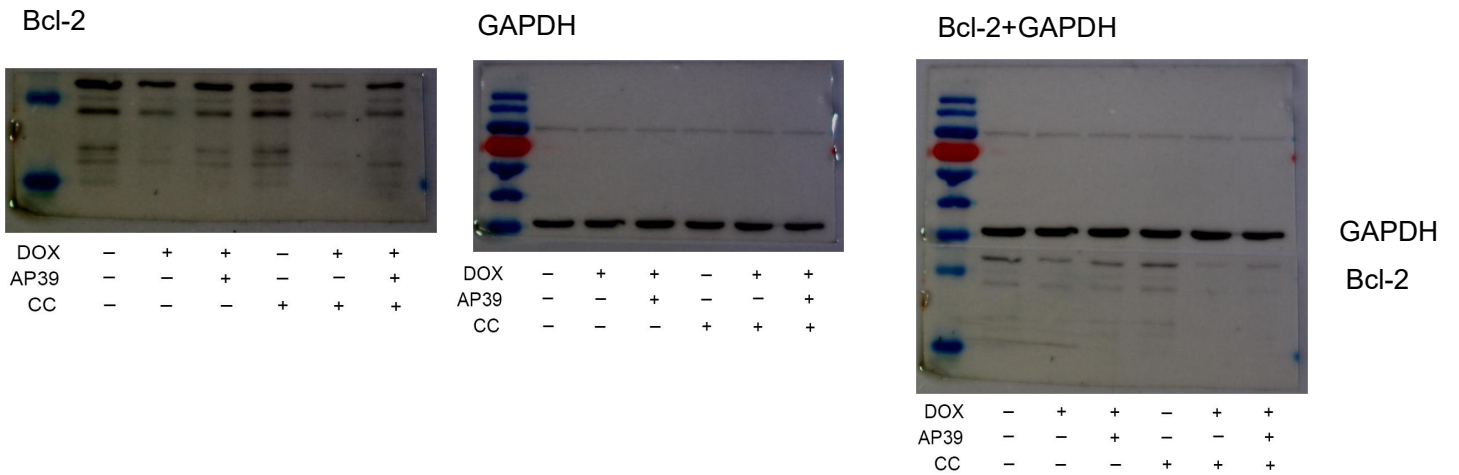

### Bcl-2 Repeat 4

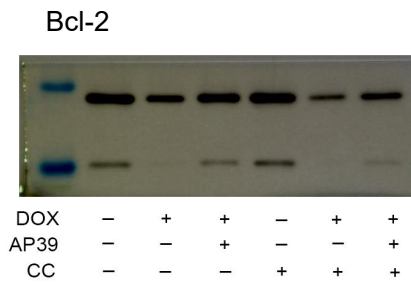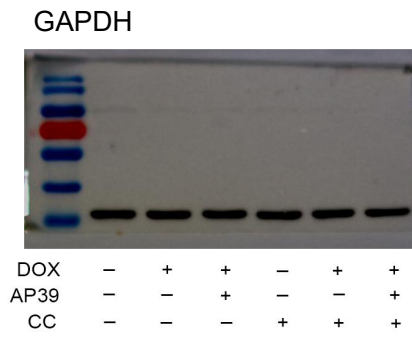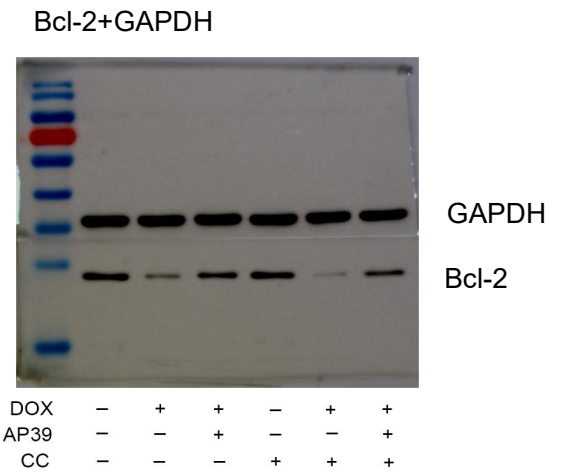

### Cleaved Caspase-3 and Caspase-3 Repeat1

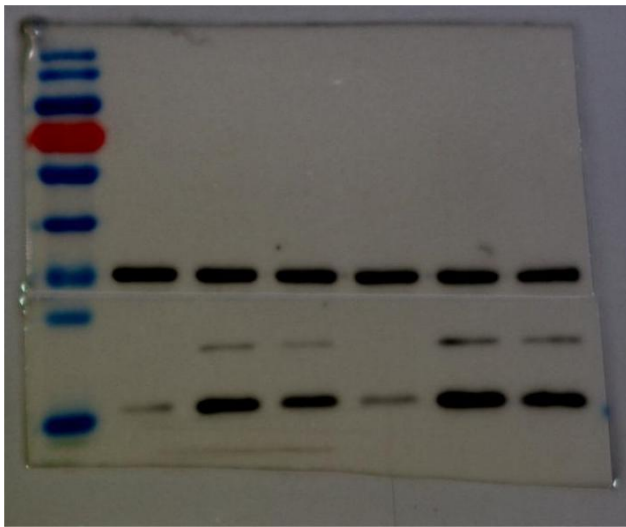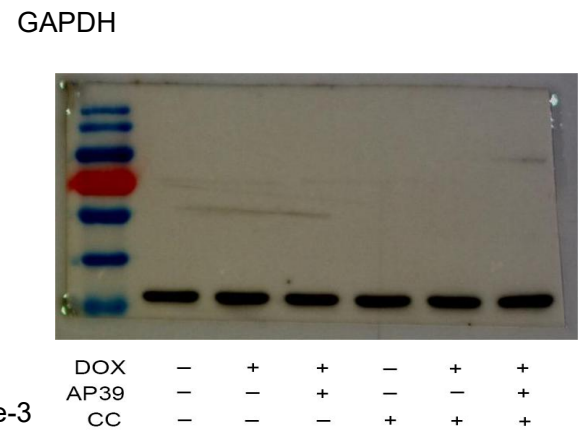

|      |   |   |   |   |   |   |
|------|---|---|---|---|---|---|
| DOX  | - | + | + | - | + | + |
| AP39 | - | - | + | - | - | + |
| CC   | - | - | - | + | + | + |

### Cleaved Caspase-3 and Caspase-3 Repeat 2

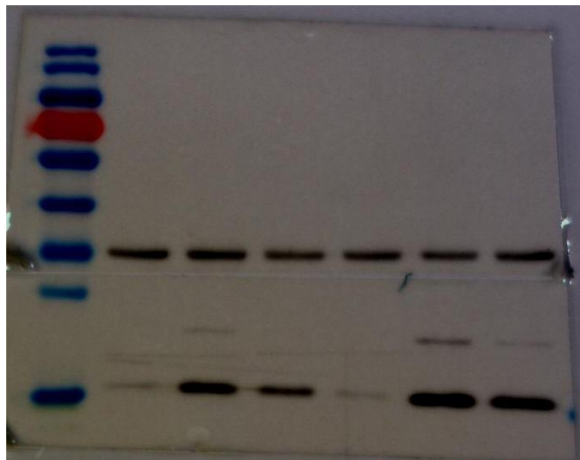

|      |   |   |   |   |   |   |
|------|---|---|---|---|---|---|
| DOX  | - | + | + | - | + | + |
| AP39 | - | - | + | - | - | + |
| CC   | - | - | - | + | + | + |

### GAPDH

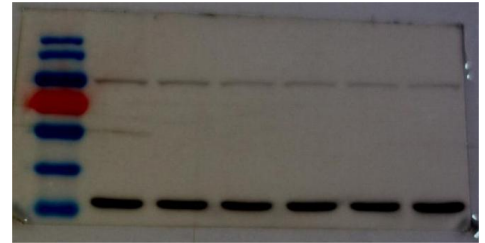

|      |   |   |   |   |   |   |
|------|---|---|---|---|---|---|
| DOX  | - | + | + | - | + | + |
| AP39 | - | - | + | - | - | + |
| CC   | - | - | - | + | + | + |

### Cleaved Caspase-3 and Caspase-3 Repeat 3

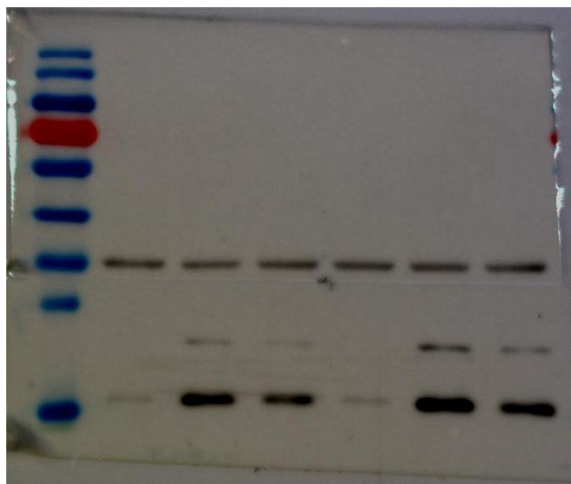

|      |   |   |   |   |   |   |
|------|---|---|---|---|---|---|
| DOX  | - | + | + | - | + | + |
| AP39 | - | - | + | - | - | + |
| CC   | - | - | - | + | + | + |

### GAPDH

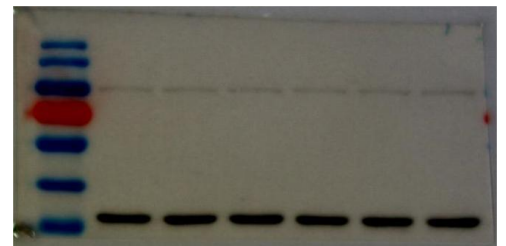

|      |   |   |   |   |   |   |
|------|---|---|---|---|---|---|
| DOX  | - | + | + | - | + | + |
| AP39 | - | - | + | - | - | + |
| CC   | - | - | - | + | + | + |

### UCP2 Repeat1

UCP2

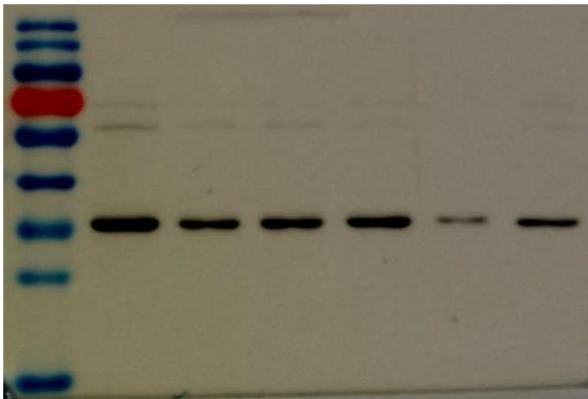

|      |   |   |   |   |   |   |
|------|---|---|---|---|---|---|
| DOX  | - | + | + | - | + | + |
| AP39 | - | - | + | - | - | + |
| CC   | - | - | - | + | + | + |

GAPDH

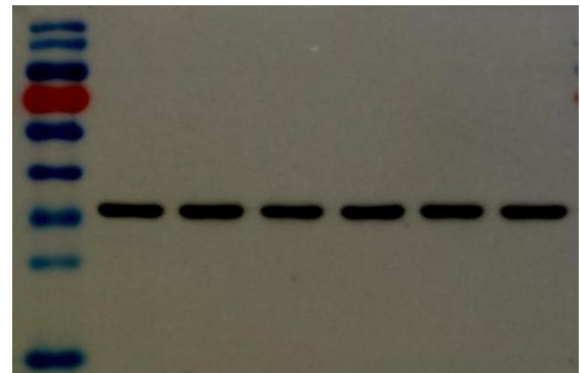

|      |   |   |   |   |   |   |
|------|---|---|---|---|---|---|
| DOX  | - | + | + | - | + | + |
| AP39 | - | - | + | - | - | + |
| CC   | - | - | - | + | + | + |

### UCP2 Repeat 2

UCP2

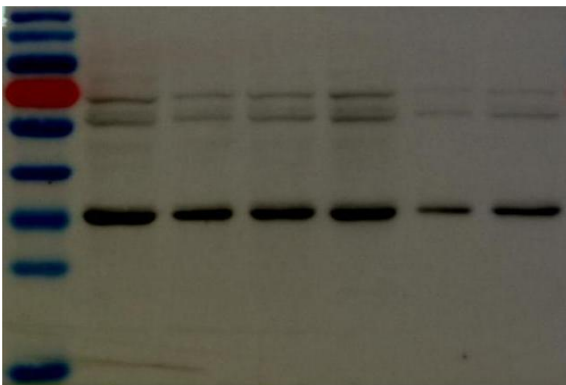

|      |   |   |   |   |   |   |
|------|---|---|---|---|---|---|
| DOX  | - | + | + | - | + | + |
| AP39 | - | - | + | - | - | + |
| CC   | - | - | - | + | + | + |

GAPDH

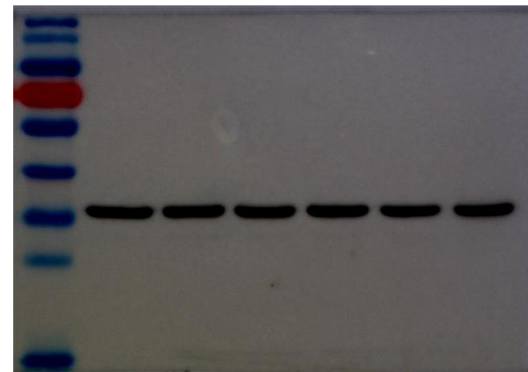

|      |   |   |   |   |   |   |
|------|---|---|---|---|---|---|
| DOX  | - | + | + | - | + | + |
| AP39 | - | - | + | - | - | + |
| CC   | - | - | - | + | + | + |

### UCP2 Repeat 3

UCP2

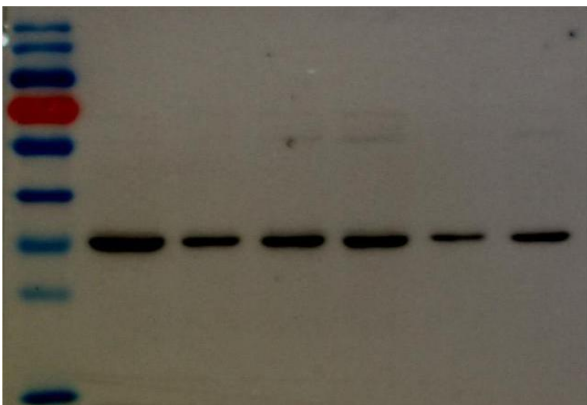

|      |   |   |   |   |   |   |
|------|---|---|---|---|---|---|
| DOX  | - | + | + | - | + | + |
| AP39 | - | - | + | - | - | + |
| CC   | - | - | - | + | + | + |

GAPDH

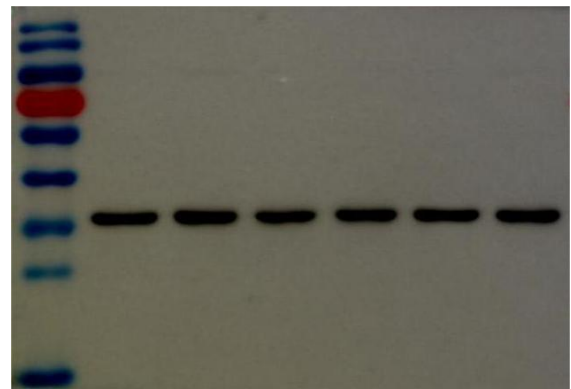

|      |   |   |   |   |   |   |
|------|---|---|---|---|---|---|
| DOX  | - | + | + | - | + | + |
| AP39 | - | - | + | - | - | + |
| CC   | - | - | - | + | + | + |



FIG.6

UCP2 Repeat1+Repeat2

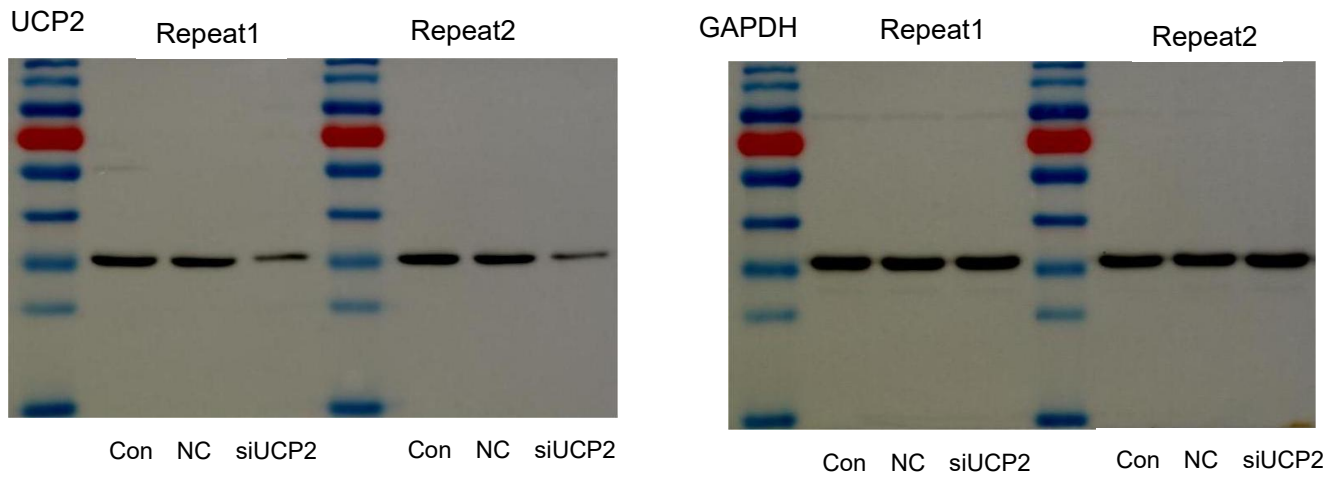

UCP2 Repeat3

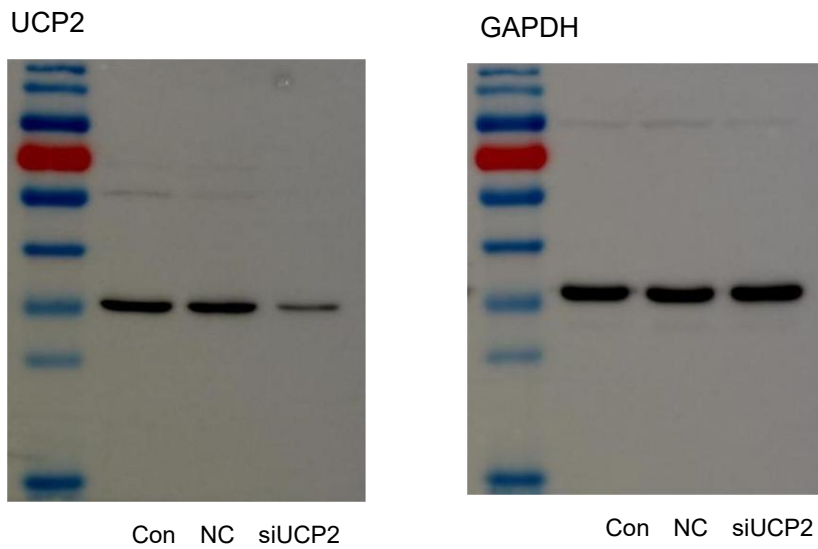

Bax Repeat1

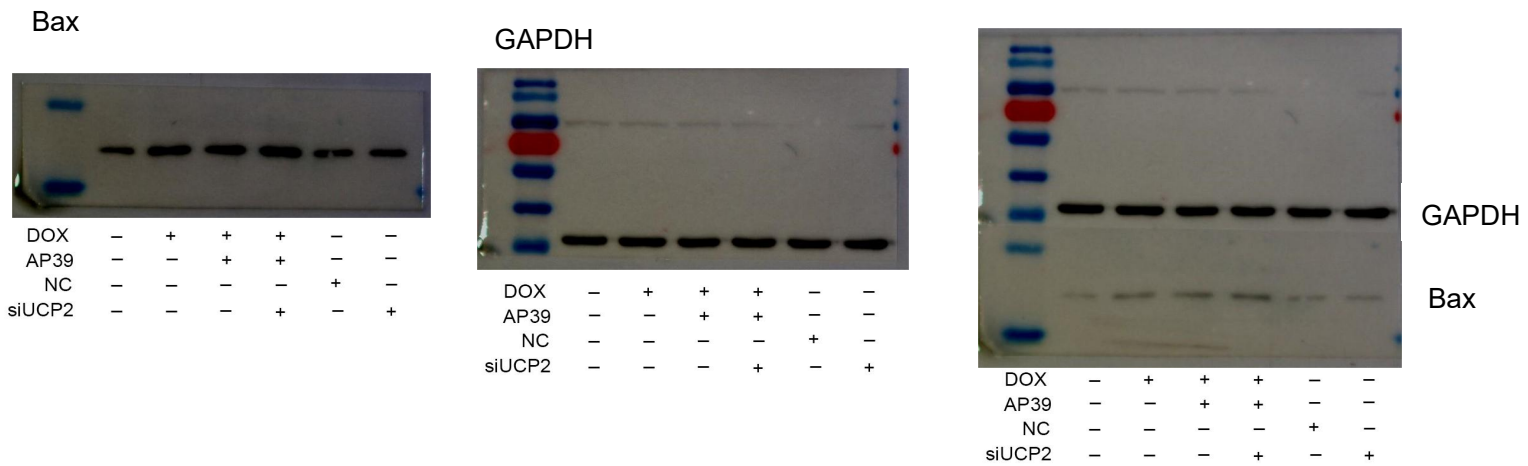

### Bax Repeat2

Bax

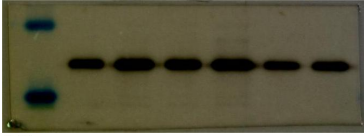

|        |   |   |   |   |   |   |
|--------|---|---|---|---|---|---|
| DOX    | - | + | + | + | - | - |
| AP39   | - | - | + | + | - | - |
| NC     | - | - | - | - | + | - |
| siUCP2 | - | - | - | + | - | + |

GAPDH

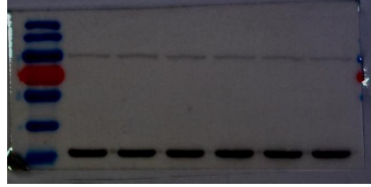

|        |   |   |   |   |   |   |
|--------|---|---|---|---|---|---|
| DOX    | - | + | + | + | - | - |
| AP39   | - | - | + | + | - | - |
| NC     | - | - | - | - | + | - |
| siUCP2 | - | - | - | + | - | + |

Bax+GAPDH

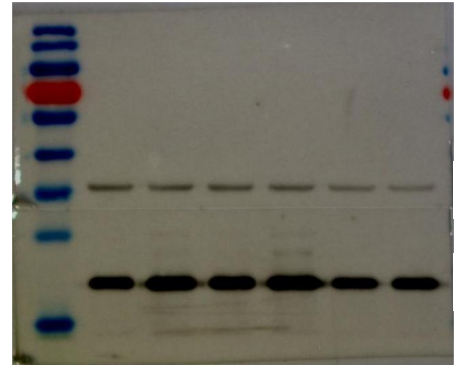

|        |   |   |   |   |   |   |
|--------|---|---|---|---|---|---|
| DOX    | - | + | + | + | - | - |
| AP39   | - | - | + | + | - | - |
| NC     | - | - | - | - | + | - |
| siUCP2 | - | - | - | + | - | + |

GAPDH

Bax

### Bax Repeat3

Bax

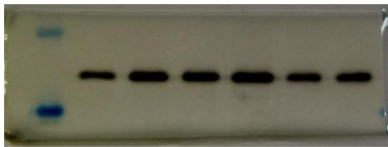

|        |   |   |   |   |   |   |
|--------|---|---|---|---|---|---|
| DOX    | - | + | + | + | - | - |
| AP39   | - | - | + | + | - | - |
| NC     | - | - | - | - | + | - |
| siUCP2 | - | - | - | + | - | + |

GAPDH

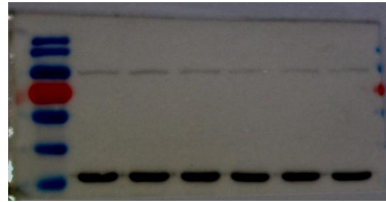

|        |   |   |   |   |   |   |
|--------|---|---|---|---|---|---|
| DOX    | - | + | + | + | - | - |
| AP39   | - | - | + | + | - | - |
| NC     | - | - | - | - | + | - |
| siUCP2 | - | - | - | + | - | + |

Bax+GAPDH

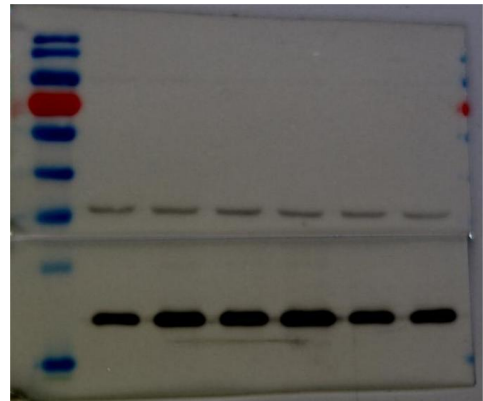

|        |   |   |   |   |   |   |
|--------|---|---|---|---|---|---|
| DOX    | - | + | + | + | - | - |
| AP39   | - | - | + | + | - | - |
| NC     | - | - | - | - | + | - |
| siUCP2 | - | - | - | + | - | + |

GAPDH

Bax

### Bax Repeat4

Bax

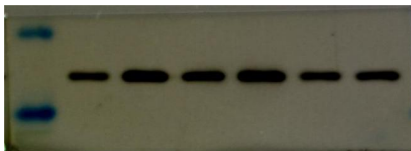

|        |   |   |   |   |   |   |
|--------|---|---|---|---|---|---|
| DOX    | - | + | + | + | - | - |
| AP39   | - | - | + | + | - | - |
| NC     | - | - | - | - | + | - |
| siUCP2 | - | - | - | + | - | + |

GAPDH

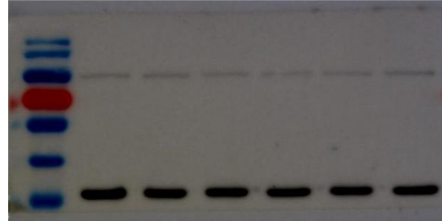

|        |   |   |   |   |   |   |
|--------|---|---|---|---|---|---|
| DOX    | - | + | + | + | - | - |
| AP39   | - | - | + | + | - | - |
| NC     | - | - | - | - | + | - |
| siUCP2 | - | - | - | + | - | + |

Bax+GAPDH

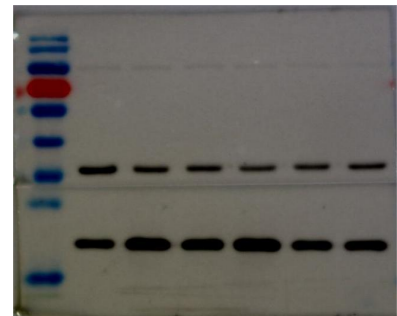

|        |   |   |   |   |   |   |
|--------|---|---|---|---|---|---|
| DOX    | - | + | + | + | - | - |
| AP39   | - | - | + | + | - | - |
| NC     | - | - | - | - | + | - |
| siUCP2 | - | - | - | + | - | + |

GAPDH

Bax

### Bcl-2 Repeat1

Bcl-2

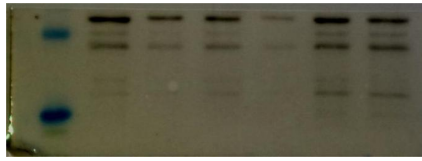

|        |   |   |   |   |   |   |
|--------|---|---|---|---|---|---|
| DOX    | - | + | + | + | - | - |
| AP39   | - | - | + | + | - | - |
| NC     | - | - | - | - | + | - |
| siUCP2 | - | - | - | + | - | + |

GAPDH

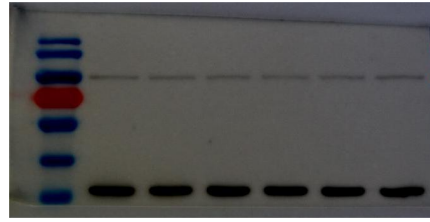

|        |   |   |   |   |   |   |
|--------|---|---|---|---|---|---|
| DOX    | - | + | + | + | - | - |
| AP39   | - | - | + | + | - | - |
| NC     | - | - | - | - | + | - |
| siUCP2 | - | - | - | + | - | + |

Bcl-2+GAPDH

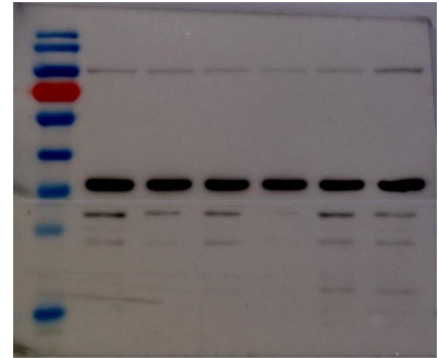

|        |   |   |   |   |   |   |
|--------|---|---|---|---|---|---|
| DOX    | - | + | + | + | - | - |
| AP39   | - | - | + | + | - | - |
| NC     | - | - | - | - | + | - |
| siUCP2 | - | - | - | + | - | + |

GAPDH  
Bcl-2

### Bcl-2 Repeat2

Bcl-2

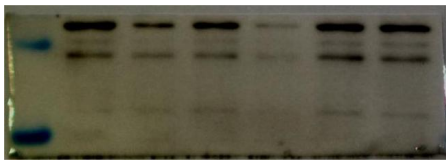

|        |   |   |   |   |   |   |
|--------|---|---|---|---|---|---|
| DOX    | - | + | + | + | - | - |
| AP39   | - | - | + | + | - | - |
| NC     | - | - | - | - | + | - |
| siUCP2 | - | - | - | + | - | + |

GAPDH

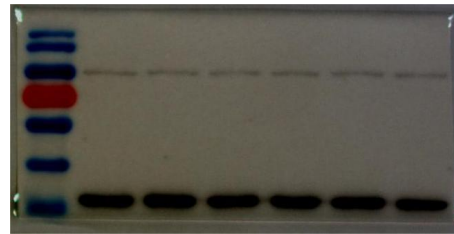

|        |   |   |   |   |   |   |
|--------|---|---|---|---|---|---|
| DOX    | - | + | + | + | - | - |
| AP39   | - | - | + | + | - | - |
| NC     | - | - | - | - | + | - |
| siUCP2 | - | - | - | + | - | + |

Bcl-2+GAPDH

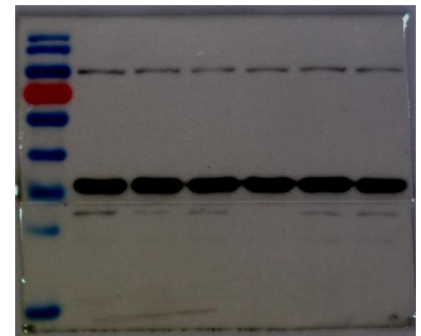

|        |   |   |   |   |   |   |
|--------|---|---|---|---|---|---|
| DOX    | - | + | + | + | - | - |
| AP39   | - | - | + | + | - | - |
| NC     | - | - | - | - | + | - |
| siUCP2 | - | - | - | + | - | + |

GAPDH  
Bcl-2

### Bcl-2 Repeat3

Bcl-2

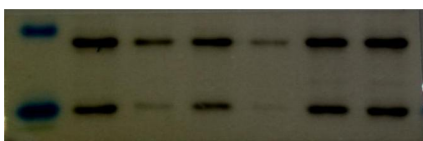

|        |   |   |   |   |   |   |
|--------|---|---|---|---|---|---|
| DOX    | - | + | + | + | - | - |
| AP39   | - | - | + | + | - | - |
| NC     | - | - | - | - | + | - |
| siUCP2 | - | - | - | + | - | + |

GAPDH

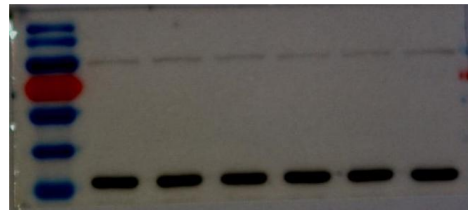

|        |   |   |   |   |   |   |
|--------|---|---|---|---|---|---|
| DOX    | - | + | + | + | - | - |
| AP39   | - | - | + | + | - | - |
| NC     | - | - | - | - | + | - |
| siUCP2 | - | - | - | + | - | + |

Bcl-2+GAPDH

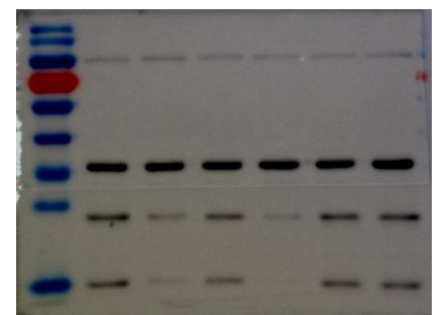

|        |   |   |   |   |   |   |
|--------|---|---|---|---|---|---|
| DOX    | - | + | + | + | - | - |
| AP39   | - | - | + | + | - | - |
| NC     | - | - | - | - | + | - |
| siUCP2 | - | - | - | + | - | + |

GAPDH  
Bcl-2

### Cleaved Caspase-3 and Caspase-3 Repeat 1

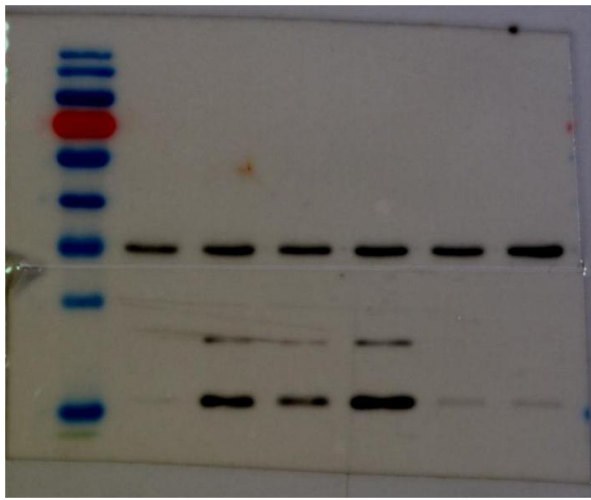

|        |   |   |   |   |   |   |
|--------|---|---|---|---|---|---|
| DOX    | - | + | + | + | - | - |
| AP39   | - | - | + | + | - | - |
| NC     | - | - | - | - | + | - |
| siUCP2 | - | - | - | + | - | + |

### GAPDH

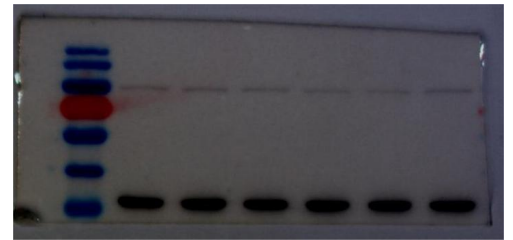

|        |   |   |   |   |   |   |
|--------|---|---|---|---|---|---|
| DOX    | - | + | + | + | - | - |
| AP39   | - | - | + | + | - | - |
| NC     | - | - | - | - | + | - |
| siUCP2 | - | - | - | + | - | + |

### Cleaved Caspase-3 and Caspase-3 Repeat 2

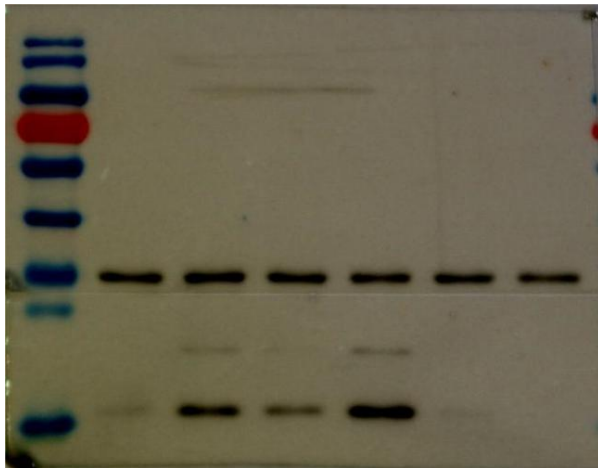

|        |   |   |   |   |   |   |
|--------|---|---|---|---|---|---|
| DOX    | - | + | + | + | - | - |
| AP39   | - | - | + | + | - | - |
| NC     | - | - | - | - | + | - |
| siUCP2 | - | - | - | + | - | + |

### GAPDH

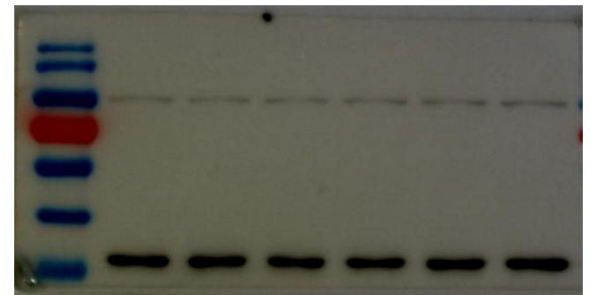

|        |   |   |   |   |   |   |
|--------|---|---|---|---|---|---|
| DOX    | - | + | + | + | - | - |
| AP39   | - | - | + | + | - | - |
| NC     | - | - | - | - | + | - |
| siUCP2 | - | - | - | + | - | + |

### Cleaved Caspase-3 and Caspase-3 Repeat 3

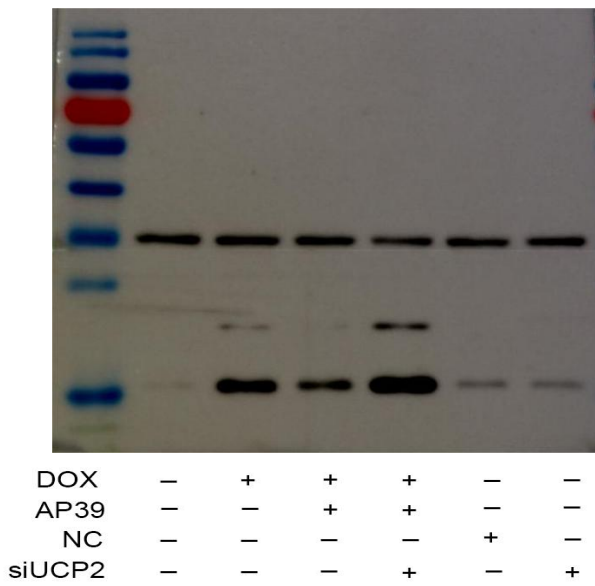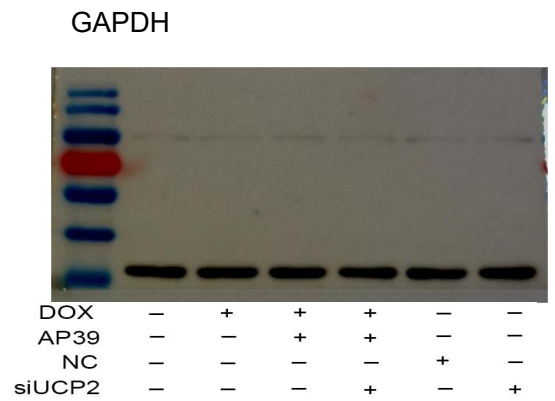

### p-AMPK and AMPK Repeat1

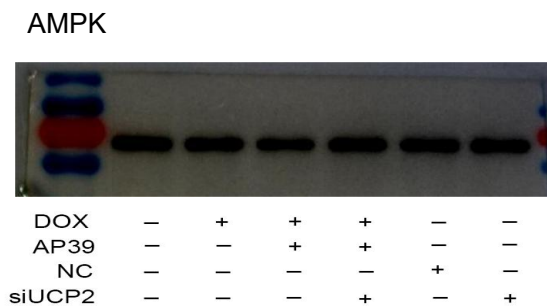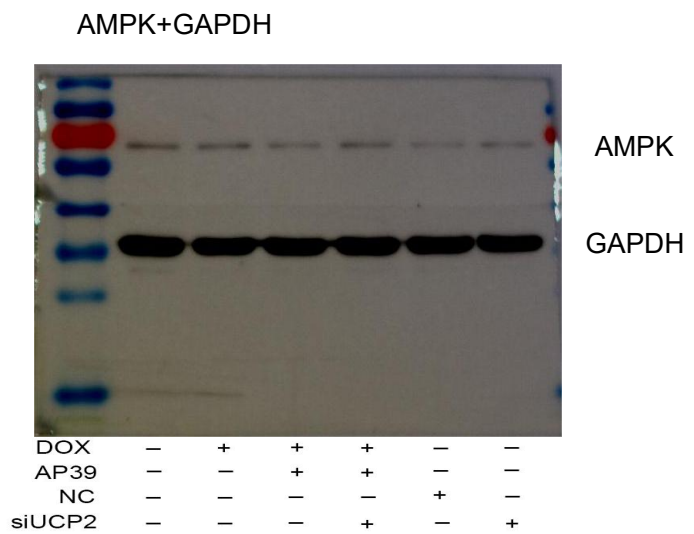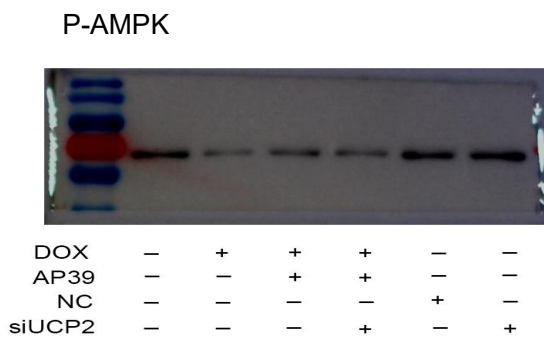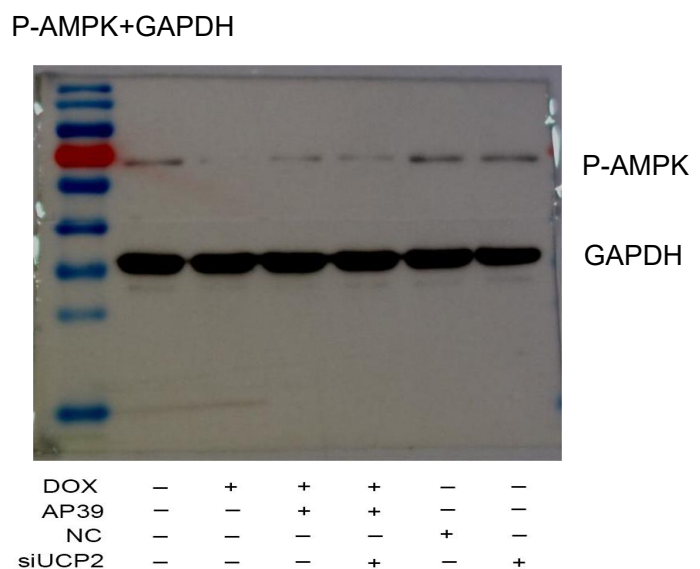



p-AMPK and AMPK Repeat2

AMPK

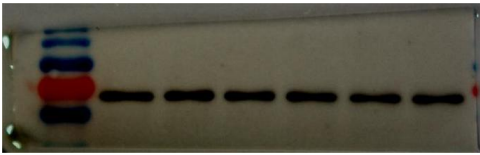

|        |   |   |   |   |   |   |
|--------|---|---|---|---|---|---|
| DOX    | - | + | + | + | - | - |
| AP39   | - | - | + | + | - | - |
| NC     | - | - | - | - | + | - |
| siUCP2 | - | - | - | + | - | + |

AMPK+GAPDH

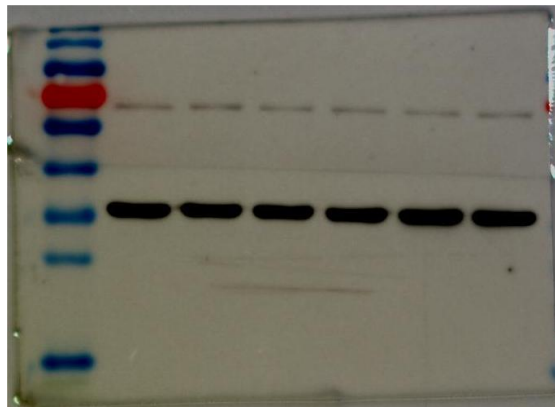

AMPK

GAPDH

|        |   |   |   |   |   |   |
|--------|---|---|---|---|---|---|
| DOX    | - | + | + | + | - | - |
| AP39   | - | - | + | + | - | - |
| NC     | - | - | - | - | + | - |
| siUCP2 | - | - | - | + | - | + |

P-AMPK

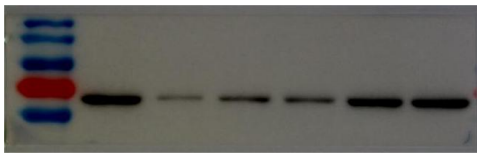

|        |   |   |   |   |   |   |
|--------|---|---|---|---|---|---|
| DOX    | - | + | + | + | - | - |
| AP39   | - | - | + | + | - | - |
| NC     | - | - | - | - | + | - |
| siUCP2 | - | - | - | + | - | + |

P-AMPK+GAPDH

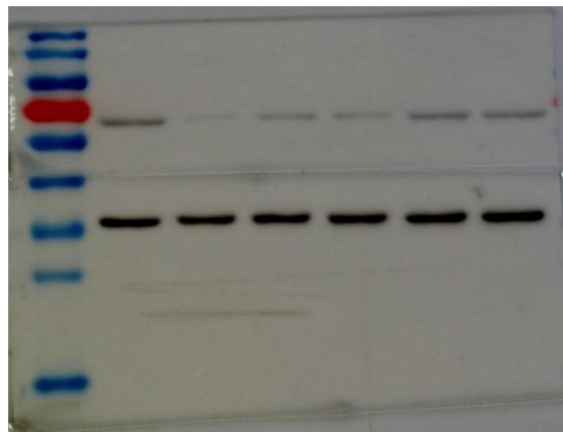

P-AMPK

GAPDH

|        |   |   |   |   |   |   |
|--------|---|---|---|---|---|---|
| DOX    | - | + | + | + | - | - |
| AP39   | - | - | + | + | - | - |
| NC     | - | - | - | - | + | - |
| siUCP2 | - | - | - | + | - | + |

p-AMPK and AMPK Repeat3

AMPK

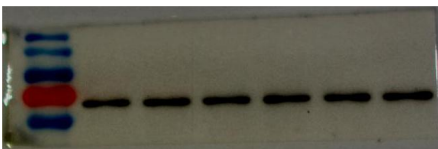

|        |   |   |   |   |   |   |
|--------|---|---|---|---|---|---|
| DOX    | - | + | + | + | - | - |
| AP39   | - | - | + | + | - | - |
| NC     | - | - | - | - | + | - |
| siUCP2 | - | - | - | + | - | + |

AMPK+GAPDH

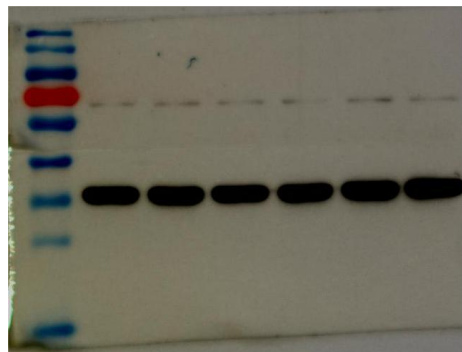

AMPK

GAPDH

|        |   |   |   |   |   |   |
|--------|---|---|---|---|---|---|
| DOX    | - | + | + | + | - | - |
| AP39   | - | - | + | + | - | - |
| NC     | - | - | - | - | + | - |
| siUCP2 | - | - | - | + | - | + |

P-AMPK

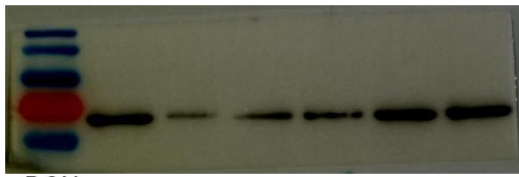

|        |   |   |   |   |   |   |
|--------|---|---|---|---|---|---|
| DOX    | - | + | + | + | - | - |
| AP39   | - | - | + | + | - | - |
| NC     | - | - | - | - | + | - |
| siUCP2 | - | - | - | + | - | + |

P-AMPK+GAPDH

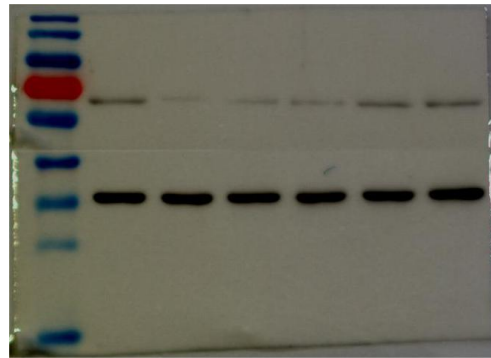

|        |   |   |   |   |   |   |
|--------|---|---|---|---|---|---|
| DOX    | - | + | + | + | - | - |
| AP39   | - | - | + | + | - | - |
| NC     | - | - | - | - | + | - |
| siUCP2 | - | - | - | + | - | + |

P-AMPK

GAPDH

FIG.7

p-AMPK and AMPK Repeat1+Repeat2

AMPK

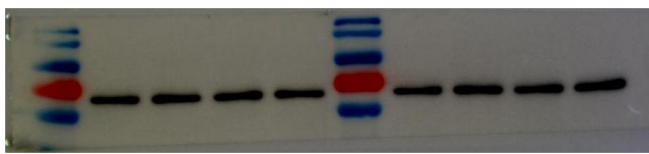

Con DOX AP39 DOX+AP39 Con DOX AP39 DOX+AP39

AMPK+GAPDH

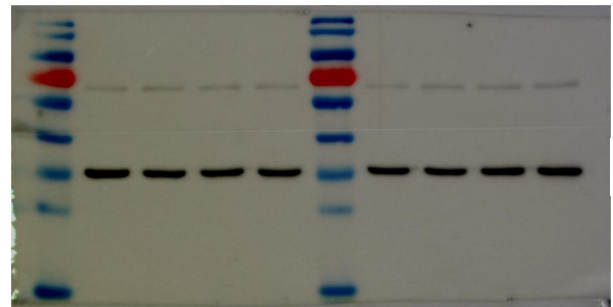

Con DOX AP39 DOX+AP39 Con DOX AP39 DOX+AP39

AMPK

GAPDH

P-AMPK

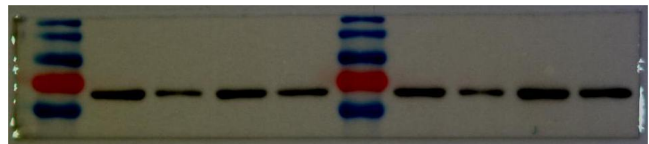

Con DOX AP39 DOX+AP39 Con DOX AP39 DOX+AP39

P-AMPK+GAPDH

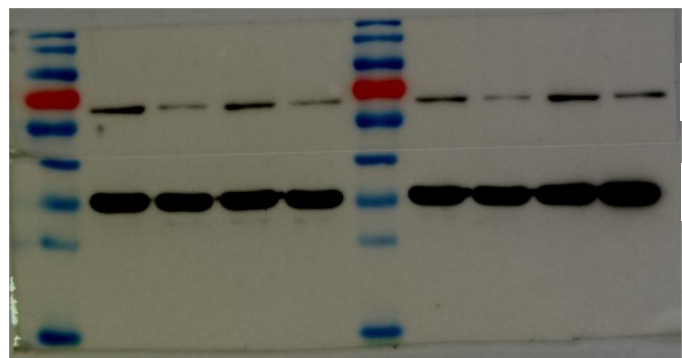

Con DOX AP39 DOX+AP39 Con DOX AP39 DOX+AP39

P-AMPK

GAPDH

p-AMPK and AMPK Repeat3+Repeat4

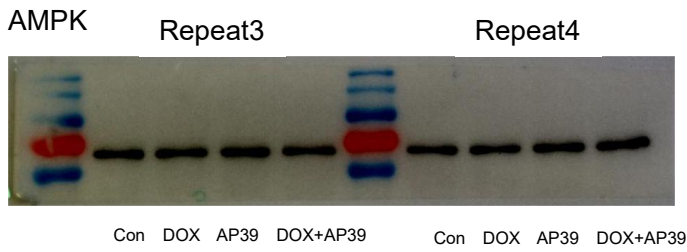

AMPK+GAPDH

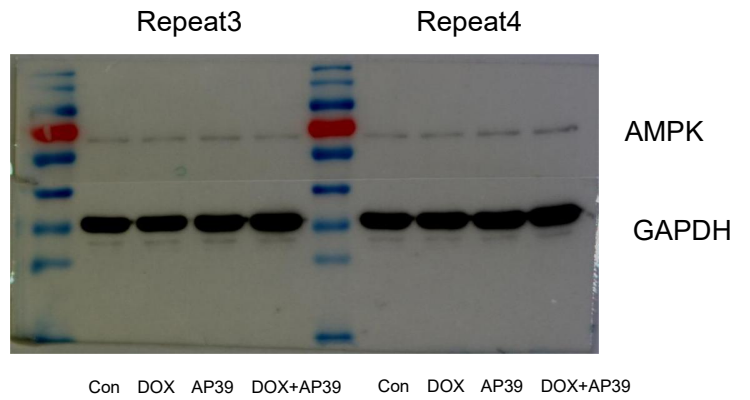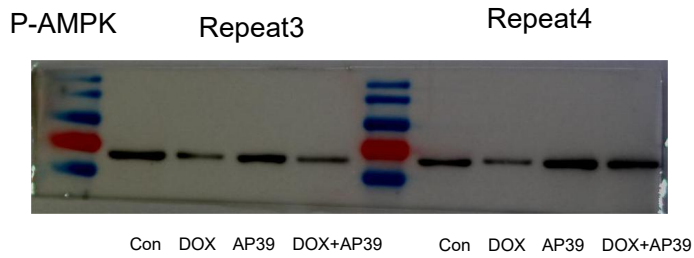

P-AMPK+GAPDH

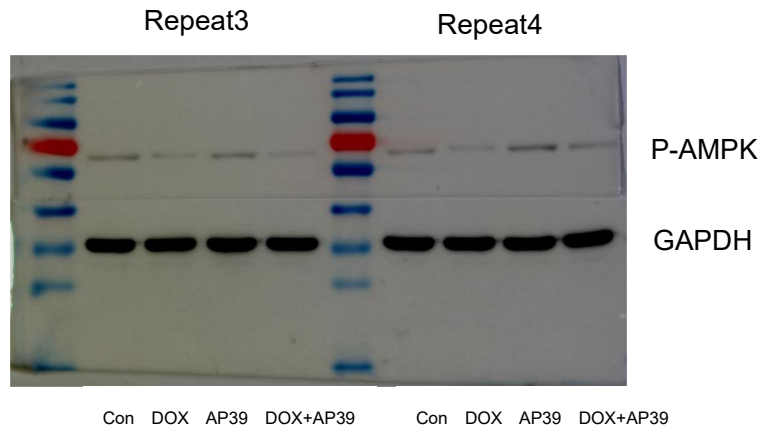

UCP2 Repeat1+Repeat2

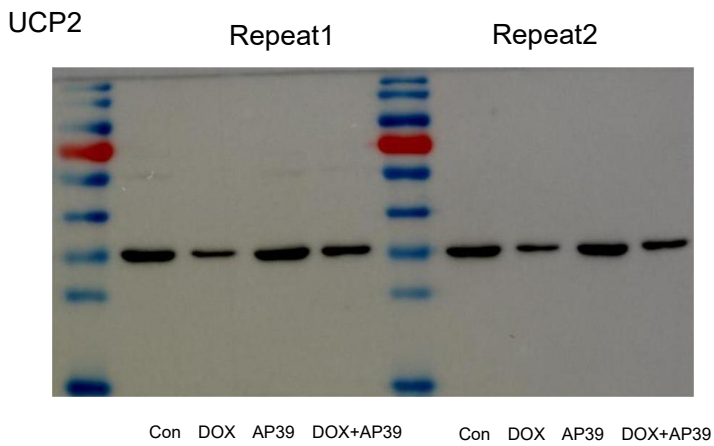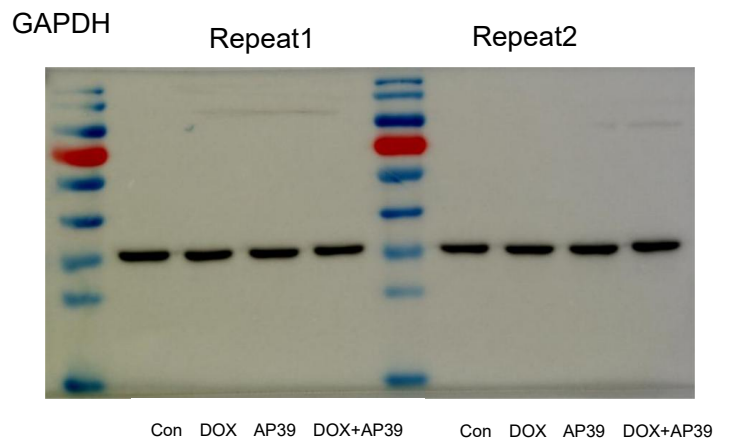

### UCP2 Repeat3+Repeat4

UCP2

Repeat3

Repeat4

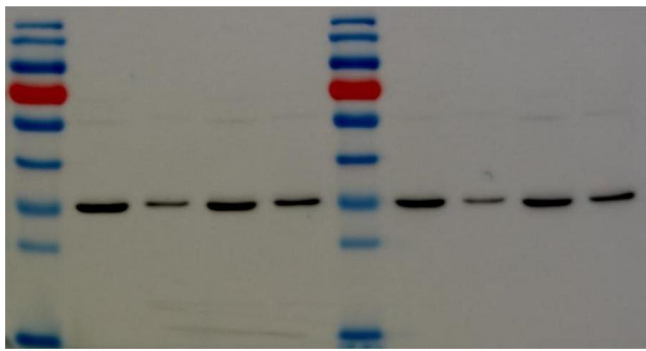

Con DOX AP39 DOX+AP39      Con DOX AP39 DOX+AP39

GAPDH

Repeat3

Repeat4

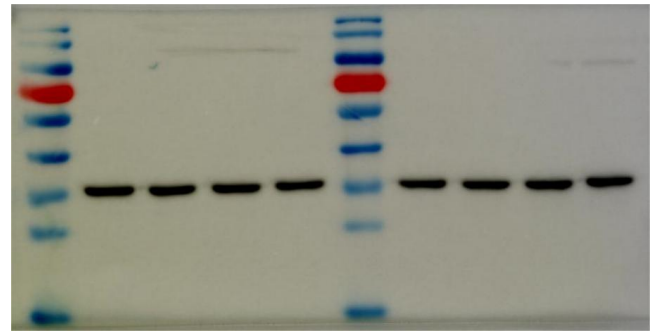

Con DOX AP39 DOX+AP39      Con DOX AP39 DOX+AP39

### Bax Repeat1

Bax

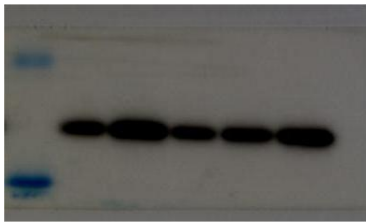

|      |   |   |   |   |   |
|------|---|---|---|---|---|
| DOX  | - | + | - | + | + |
| AP39 | - | - | + | + | + |
| CC   | - | - | - | - | + |

GAPDH

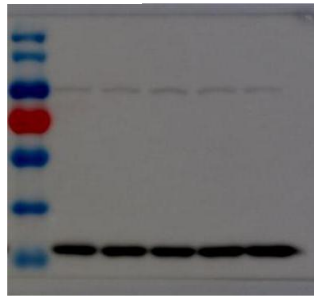

|      |   |   |   |   |   |
|------|---|---|---|---|---|
| DOX  | - | + | - | + | + |
| AP39 | - | - | + | + | + |
| CC   | - | - | - | - | + |

Bax+GAPDH

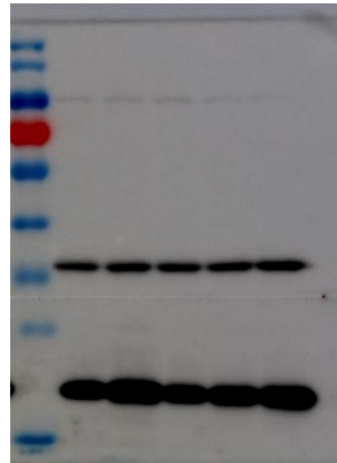

GAPDH

Bax

|      |   |   |   |   |   |
|------|---|---|---|---|---|
| DOX  | - | + | - | + | + |
| AP39 | - | - | + | + | + |
| CC   | - | - | - | - | + |

### Bax Repeat2

Bax

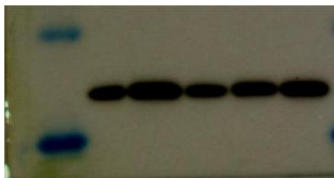

|      |   |   |   |   |   |
|------|---|---|---|---|---|
| DOX  | - | + | - | + | + |
| AP39 | - | - | + | + | + |
| CC   | - | - | - | - | + |

GAPDH

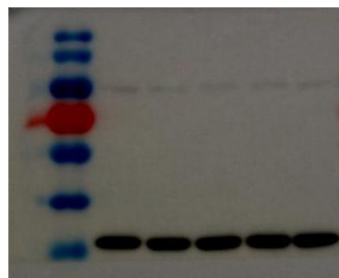

|      |   |   |   |   |   |
|------|---|---|---|---|---|
| DOX  | - | + | - | + | + |
| AP39 | - | - | + | + | + |
| CC   | - | - | - | - | + |

Bax+GAPDH

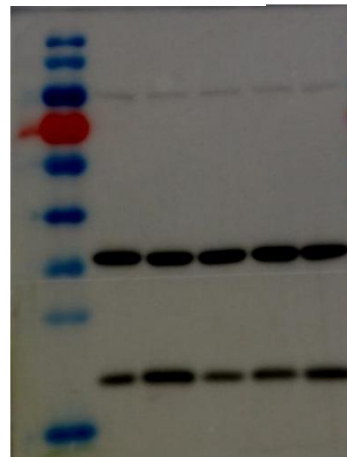

GAPDH

Bax

|      |   |   |   |   |   |
|------|---|---|---|---|---|
| DOX  | - | + | - | + | + |
| AP39 | - | - | + | + | + |
| CC   | - | - | - | - | + |

### Bax Repeat3

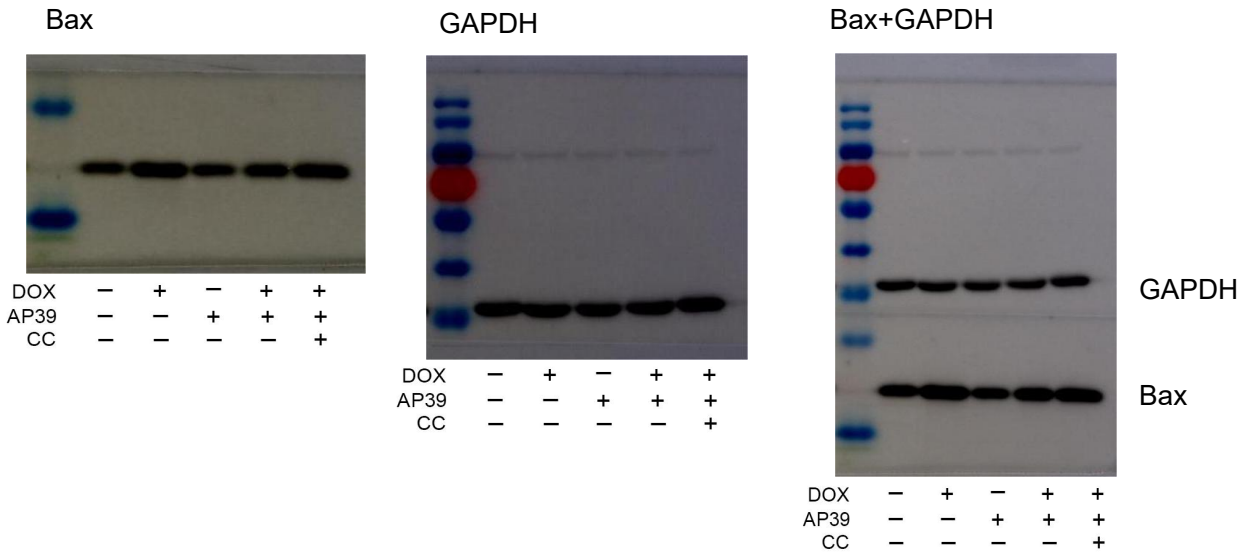

### Bcl-2 Repeat1+Repeat2

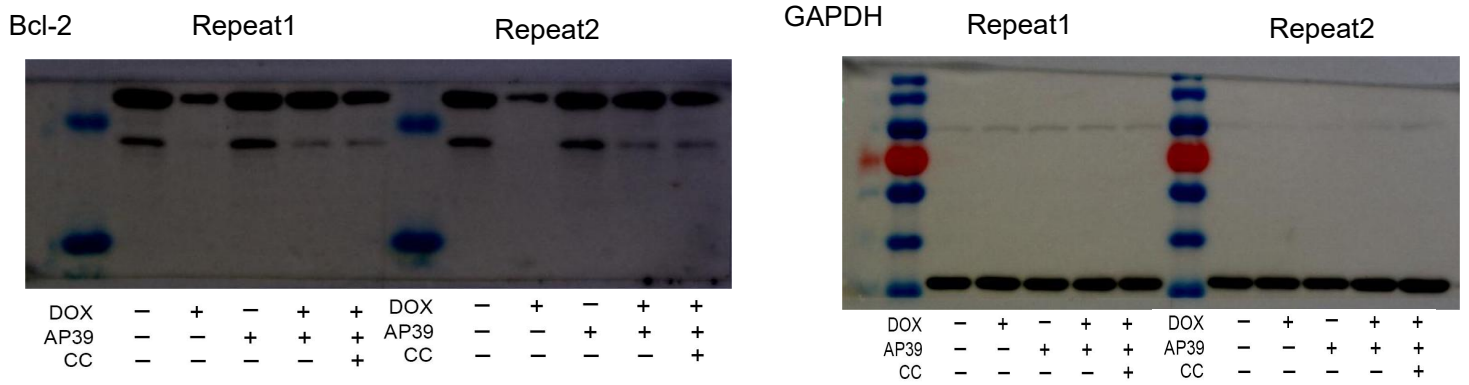

### Bcl-2+GAPDH

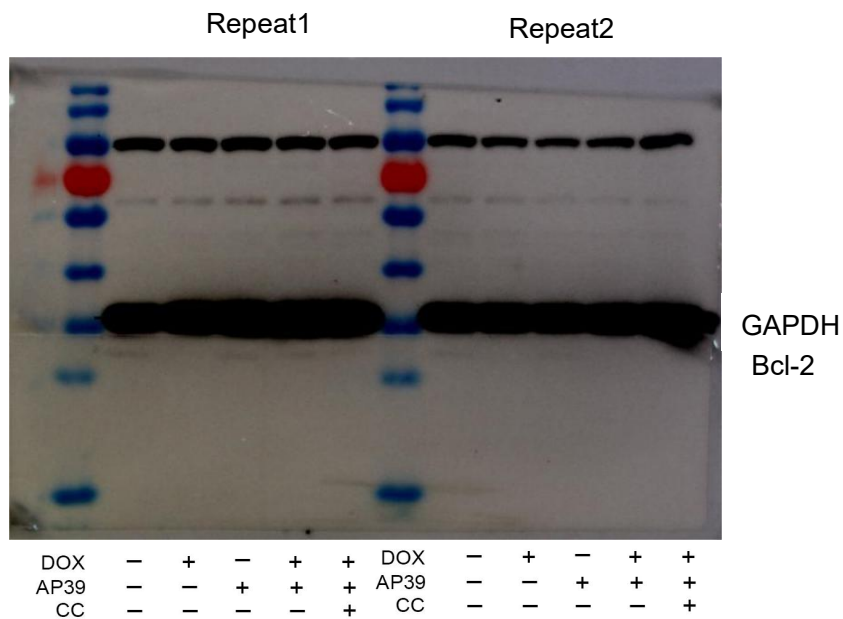



### Bcl-2 Repeat3

Bcl-2

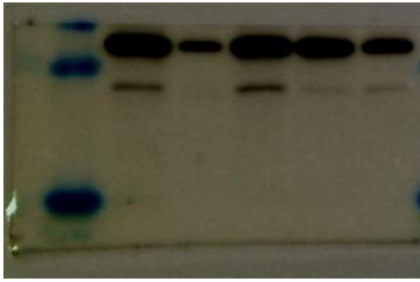

|      |   |   |   |   |   |
|------|---|---|---|---|---|
| DOX  | - | + | - | + | + |
| AP39 | - | - | + | + | + |
| CC   | - | - | - | - | + |

GAPDH

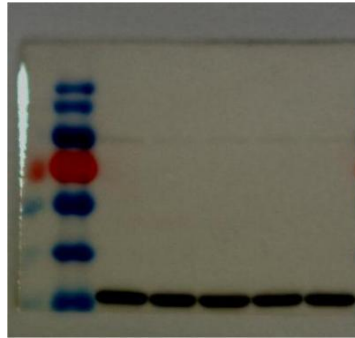

|      |   |   |   |   |   |
|------|---|---|---|---|---|
| DOX  | - | + | - | + | + |
| AP39 | - | - | + | + | + |
| CC   | - | - | - | - | + |

Bcl-2+GAPDH

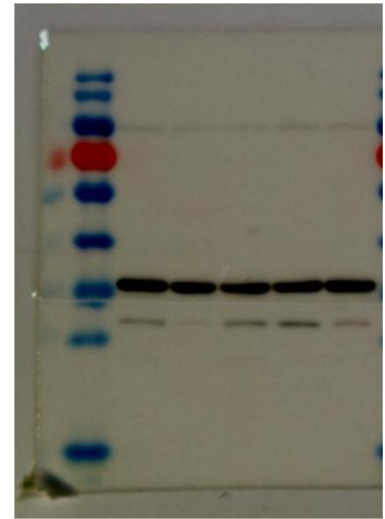

GAPDH  
Bcl-2

|      |   |   |   |   |   |
|------|---|---|---|---|---|
| DOX  | - | + | - | + | + |
| AP39 | - | - | + | + | + |
| CC   | - | - | - | - | + |

### Bcl-2 Repeat4

Bcl-2

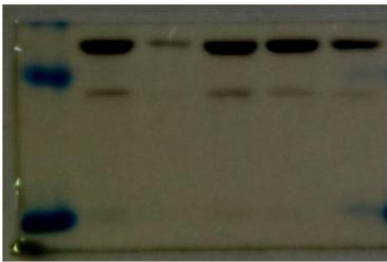

|      |   |   |   |   |   |
|------|---|---|---|---|---|
| DOX  | - | + | - | + | + |
| AP39 | - | - | + | + | + |
| CC   | - | - | - | - | + |

GAPDH

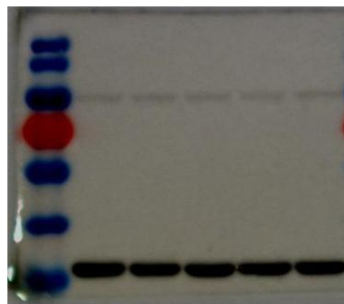

|      |   |   |   |   |   |
|------|---|---|---|---|---|
| DOX  | - | + | - | + | + |
| AP39 | - | - | + | + | + |
| CC   | - | - | - | - | + |

Bcl-2+GAPDH

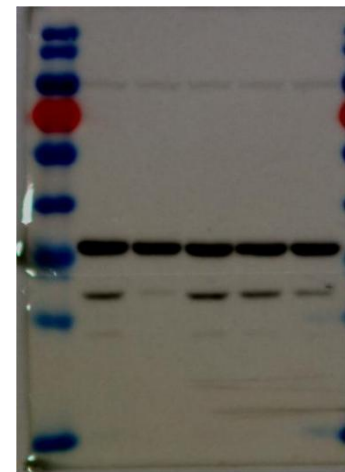

GAPDH  
Bcl-2

|      |   |   |   |   |   |
|------|---|---|---|---|---|
| DOX  | - | + | - | + | + |
| AP39 | - | - | + | + | + |
| CC   | - | - | - | - | + |

### Cleaved Caspase-3 and Caspase-3 Repeat1+Repeat2

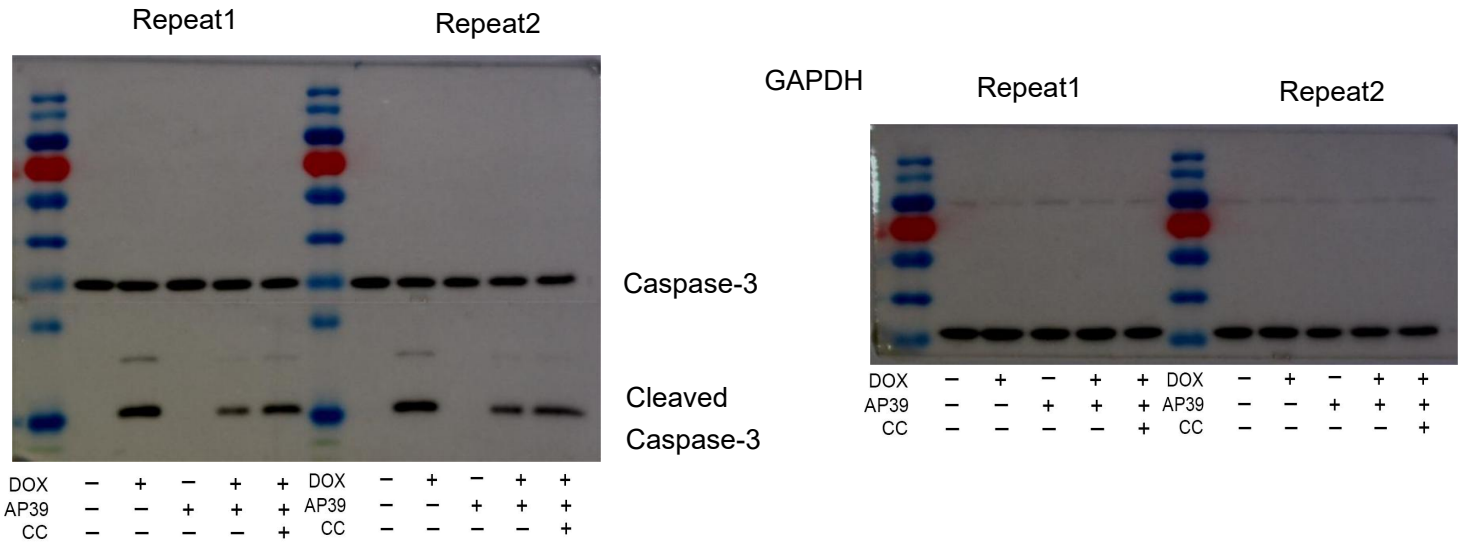

### Cleaved Caspase-3 and Caspase-3 Repeat3

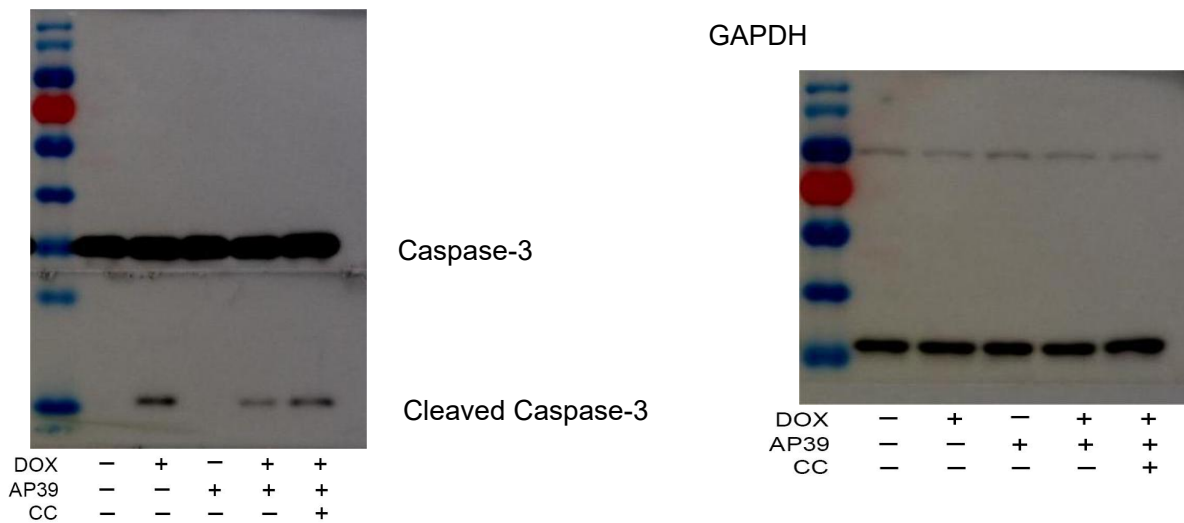

### Cleaved Caspase-3 and Caspase-3 Repeat4

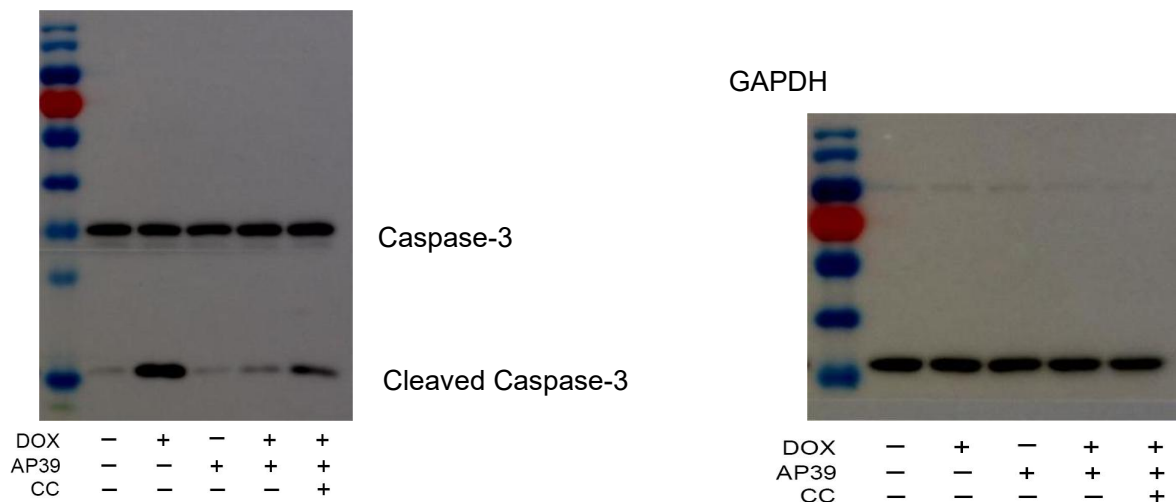

### Bax Repeat1

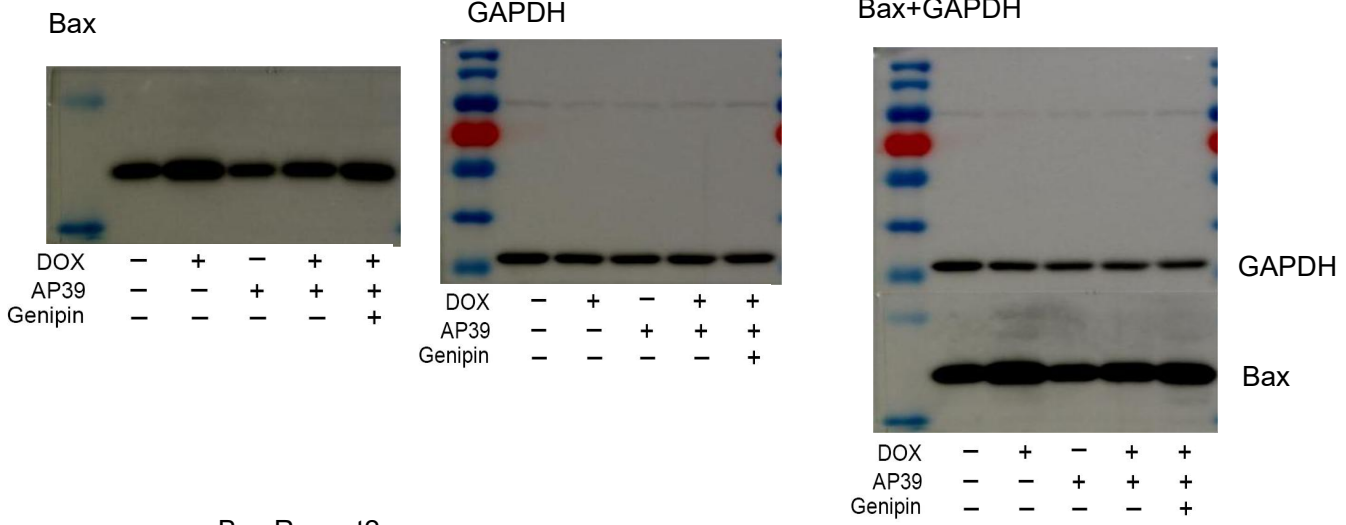

### Bax Repeat2

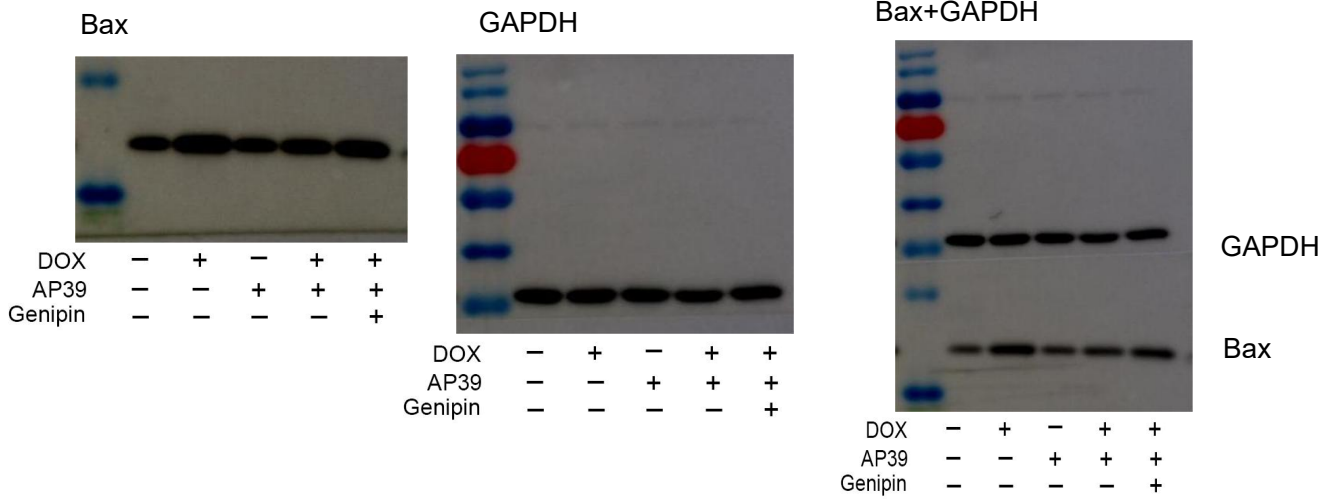

### Bax Repeat3

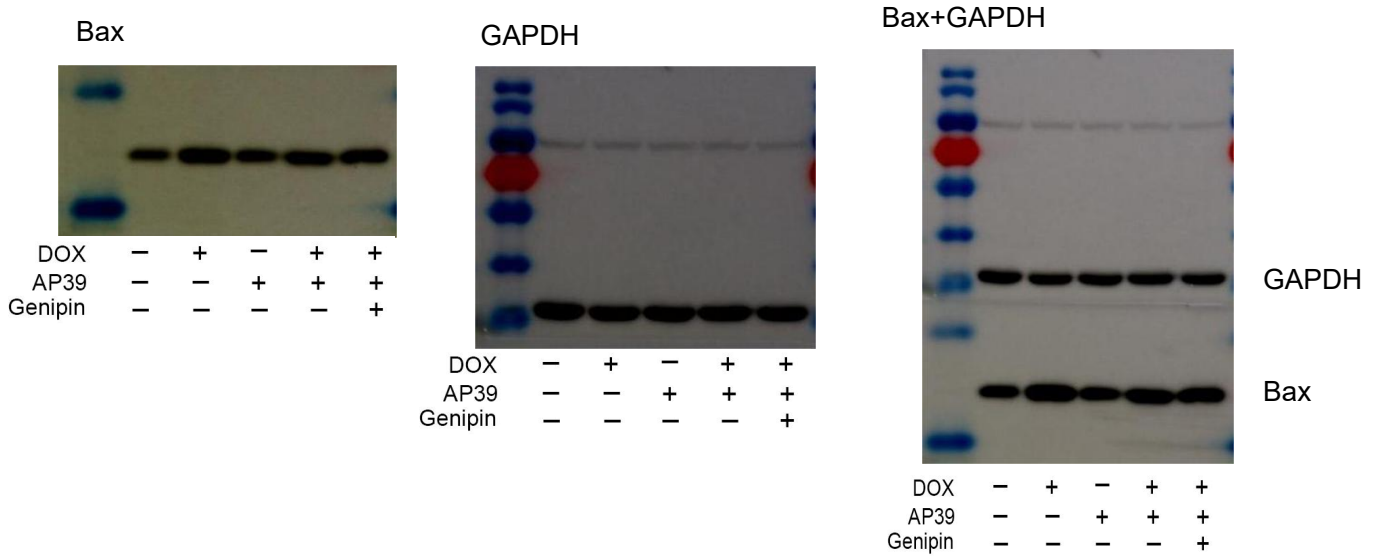

Bcl-2 Repeat1+Repeat2

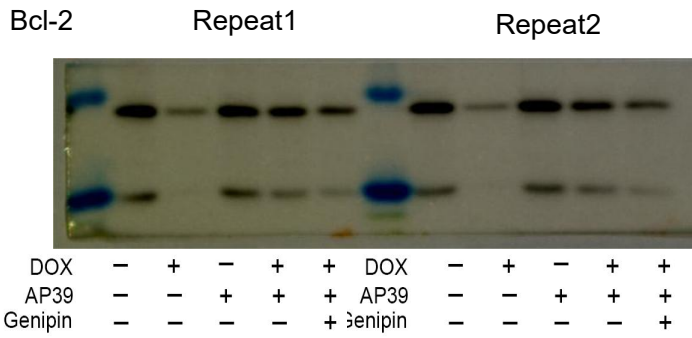

|         | Repeat1 |   |   |   |   | Repeat2 |   |   |   |   |   |
|---------|---------|---|---|---|---|---------|---|---|---|---|---|
| DOX     | -       | + | - | + | + | DOX     | - | + | - | + | + |
| AP39    | -       | - | + | + | + | AP39    | - | - | + | + | + |
| Genipin | -       | - | - | - | + | Genipin | - | - | - | - | + |

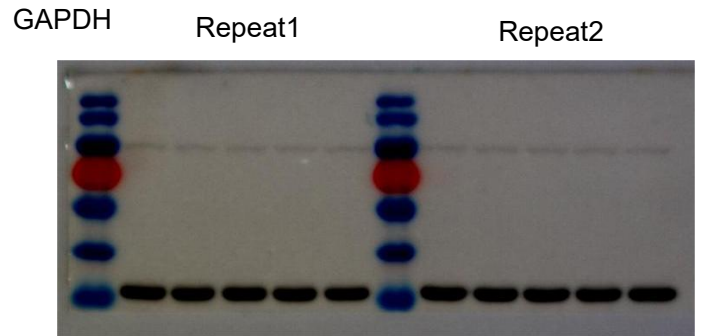

|         | Repeat1 |   |   |   |   | Repeat2 |   |   |   |   |   |
|---------|---------|---|---|---|---|---------|---|---|---|---|---|
| DOX     | -       | + | - | + | + | DOX     | - | + | - | + | + |
| AP39    | -       | - | + | + | + | AP39    | - | - | + | + | + |
| Genipin | -       | - | - | - | + | Genipin | - | - | - | - | + |

Bcl-2+GAPDH Repeat1 Repeat2

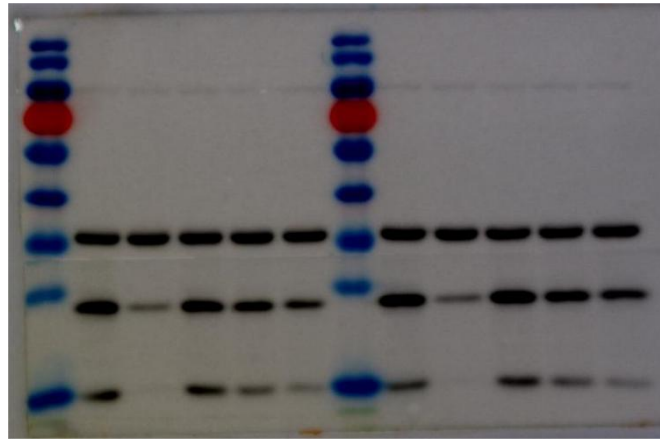

|         | Repeat1 |   |   |   |   | Repeat2 |   |   |   |   |   |
|---------|---------|---|---|---|---|---------|---|---|---|---|---|
| DOX     | -       | + | - | + | + | DOX     | - | + | - | + | + |
| AP39    | -       | - | + | + | + | AP39    | - | - | + | + | + |
| Genipin | -       | - | - | - | + | Genipin | - | - | - | - | + |

GAPDH  
Bcl-2

Bcl-2 Repeat3

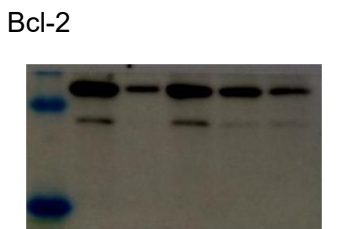

|         |   |   |   |   |   |
|---------|---|---|---|---|---|
| DOX     | - | + | - | + | + |
| AP39    | - | - | + | + | + |
| Genipin | - | - | - | - | + |

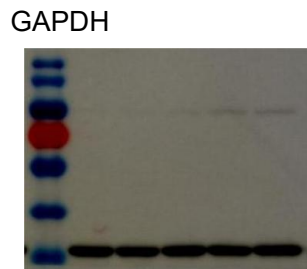

|         |   |   |   |   |   |
|---------|---|---|---|---|---|
| DOX     | - | + | - | + | + |
| AP39    | - | - | + | + | + |
| Genipin | - | - | - | - | + |

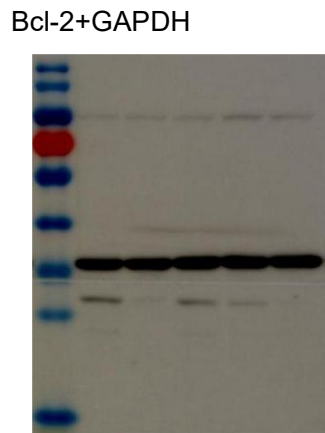

|         |   |   |   |   |   |
|---------|---|---|---|---|---|
| DOX     | - | + | - | + | + |
| AP39    | - | - | + | + | + |
| Genipin | - | - | - | - | + |

GAPDH  
Bcl-2

### Bcl-2 Repeat4

Bcl-2

GAPDH

Bcl-2+GAPDH

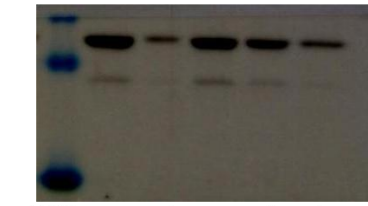

|         |   |   |   |   |   |
|---------|---|---|---|---|---|
| DOX     | - | + | - | + | + |
| AP39    | - | - | + | + | + |
| Genipin | - | - | - | - | + |

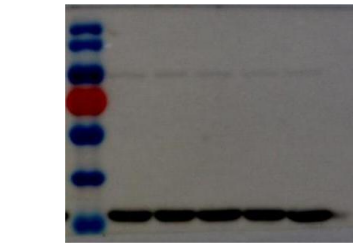

|         |   |   |   |   |   |
|---------|---|---|---|---|---|
| DOX     | - | + | - | + | + |
| AP39    | - | - | + | + | + |
| Genipin | - | - | - | - | + |

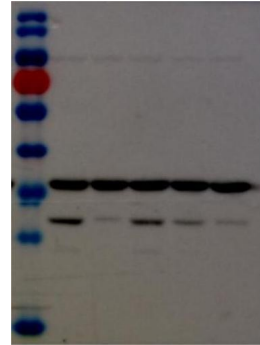

GAPDH  
Bcl-2

|         |   |   |   |   |   |
|---------|---|---|---|---|---|
| DOX     | - | + | - | + | + |
| AP39    | - | - | + | + | + |
| Genipin | - | - | - | - | + |

### Cleaved Caspase-3 and Caspase-3 Repeat 1+Repeat2

Repeat1

Repeat2

GAPDH

Repeat1

Repeat2

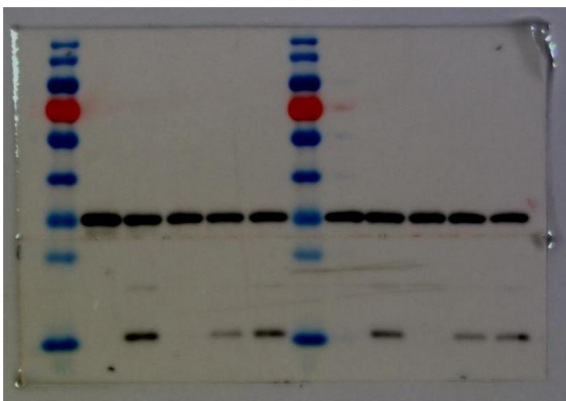

|         |   |   |   |   |   |
|---------|---|---|---|---|---|
| DOX     | - | + | - | + | + |
| AP39    | - | - | + | + | + |
| Genipin | - | - | - | - | + |

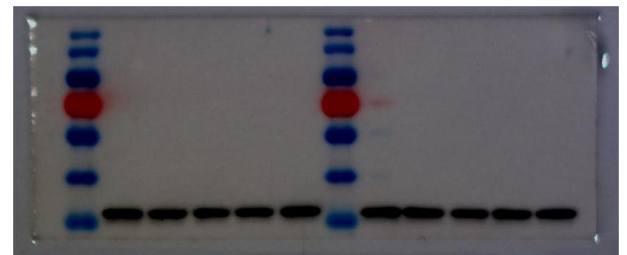

|         |   |   |   |   |   |
|---------|---|---|---|---|---|
| DOX     | - | + | - | + | + |
| AP39    | - | - | + | + | + |
| Genipin | - | - | - | - | + |

### Cleaved Caspase-3 and Caspase-3 Repeat 3

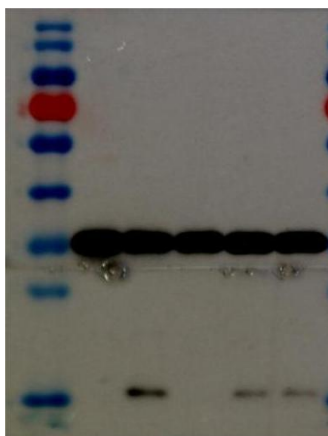

|         |   |   |   |   |   |
|---------|---|---|---|---|---|
| DOX     | - | + | - | + | + |
| AP39    | - | - | + | + | + |
| Genipin | - | - | - | - | + |

GAPDH

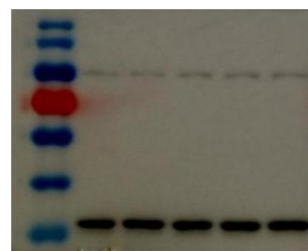

|         |   |   |   |   |   |
|---------|---|---|---|---|---|
| DOX     | - | + | - | + | + |
| AP39    | - | - | + | + | + |
| Genipin | - | - | - | - | + |



### Cleaved Caspase-3 and Caspase-3 Repeat 4

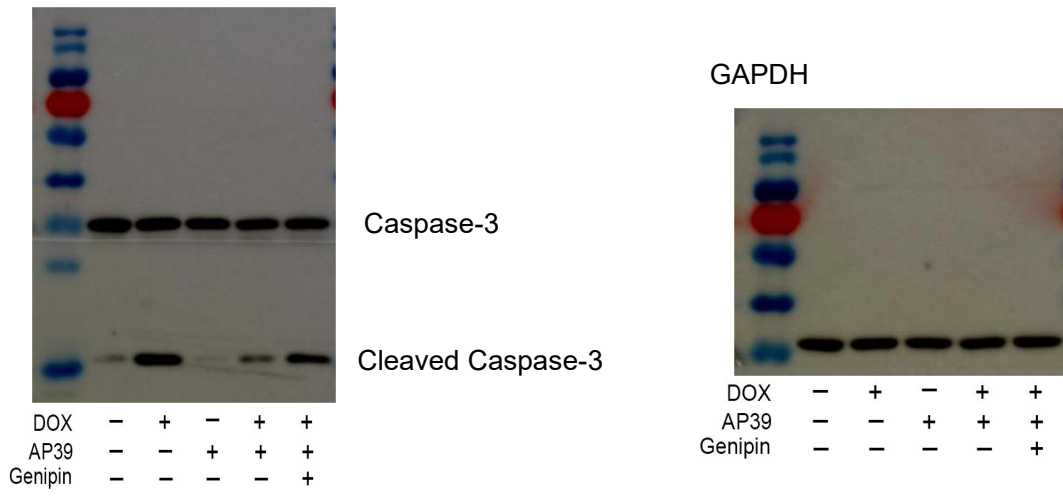

Supplement: pone.0300261.s001.pdf [file pone.0300261.s001.pdf]
