# Supplementary material for: AP39, a novel mitochondria-targeted hydrogen sulfide donor ameliorates doxorubicin-induced cardiotoxicity by regulating the AMPK/UCP2 pathway
Source: PubMed Central journal article supplement (PMC10990198; doi:10.1371/journal.pone.0300261), 2024-04-03
Supplement: pone.0300261.s002.pdf [file pone.0300261.s002.pdf]

Fig 1

A

|  | Con         | 0.5         | 1           | 2           |
|--|-------------|-------------|-------------|-------------|
|  | 95.02034413 | 65.14388397 | 55.14037278 | 44.41718490 |
|  | 104.0563140 | 69.34688853 | 57.51302475 | 48.55017626 |
|  | 95.78485244 | 65.34122742 | 53.20755542 | 41.90250464 |
|  | 105.1384894 | 72.65726432 | 51.47095677 | 48.76880288 |

| 描述性统计    | A     | B     | C     | D     |
|----------|-------|-------|-------|-------|
|          | Con   | 0.5   | 1     | 2     |
| 值的数目     | 4     | 4     | 4     | 4     |
| 最小       | 95.02 | 65.14 | 53.21 | 41.90 |
| 最大值      | 105.1 | 72.66 | 61.47 | 48.77 |
| 范围       | 10.12 | 7.513 | 8.263 | 6.866 |
| 平均: mean | 100.0 | 68.12 | 56.83 | 45.91 |
| 标准偏差 SD  | 5.336 | 3.590 | 3.558 | 3.338 |
| 标准误差的平均值 | 2.668 | 1.795 | 1.779 | 1.669 |

B

| 组 A          | 组 B         | 组 C         | 组 D         | 组 E         |
|--------------|-------------|-------------|-------------|-------------|
| Con          | 6h          | 12h         | 24h         | 48h         |
| 99.17768722  | 35.31934035 | 33.22778282 | 48.72804625 | 20.66744672 |
| 97.08317187  | 30.87260331 | 79.05687465 | 47.57787506 | 20.21245819 |
| 100.27804490 | 34.25175350 | 31.94047186 | 50.73913218 | 19.16341642 |
| 96.97208912  | 79.16345023 | 78.35253681 | 48.80194492 | 19.23327742 |
| 106.48900690 | 38.19340679 | 32.16634636 | 56.67656583 | 22.25307541 |

| 描述性统计    | A     | B     | C      | D     | E      |
|----------|-------|-------|--------|-------|--------|
|          | Con   | 6h    | 12h    | 24h   | 48h    |
| 值的数目     | 5     | 5     | 5      | 5     | 5      |
| 最小       | 96.97 | 79.16 | 78.35  | 47.58 | 19.16  |
| 最大值      | 106.5 | 88.19 | 83.23  | 56.68 | 22.25  |
| 范围       | 9.517 | 9.030 | 4.875  | 9.099 | 3.090  |
| 平均: mean | 100.0 | 83.56 | 80.95  | 50.50 | 20.31  |
| 标准偏差 SD  | 3.890 | 3.591 | 2.120  | 3.632 | 1.264  |
| 标准误差的平均值 | 1.740 | 1.606 | 0.9481 | 1.624 | 0.5651 |

C

| 组 A         | 组 B         |
|-------------|-------------|
| Con         | DOX         |
| 1.015931013 | 2.207449008 |
| 0.860943832 | 2.097909195 |
| 0.997737029 | 2.337513439 |
| 1.045590214 | 2.143055837 |
| 1.079797911 | 2.134597890 |

| 描述性统计    | A       | B       |
|----------|---------|---------|
|          | Con     | DOX     |
| 值的数目     | 5       | 5       |
| 最小       | 0.8609  | 2.098   |
| 最大值      | 1.080   | 2.338   |
| 范围       | 0.2189  | 0.2396  |
| 平均: mean | 1.000   | 2.184   |
| 标准偏差 SD  | 0.08373 | 0.09440 |
| 标准误差的平均值 | 0.03744 | 0.04222 |

D

SOD

| 格式: 列 | 组 A         | 组 B         |
|-------|-------------|-------------|
|       | Con         | DOX         |
| 1     | 0.009190838 | 0.004009002 |
| 2     | 0.008710496 | 0.004072746 |
| 3     | 0.008839669 | 0.003650656 |
| 4     | 0.009539399 | 0.003701586 |

| 描述性统计    | A         | B         |
|----------|-----------|-----------|
|          | Con       | DOX       |
| 值的数目     | 4         | 4         |
| 最小       | 0.006710  | 0.003651  |
| 最大值      | 0.009539  | 0.004073  |
| 范围       | 0.0008289 | 0.0004221 |
| 平均: mean | 0.009070  | 0.003858  |
| 标准偏差 SD  | 0.0003729 | 0.0002132 |
| 标准误差的平均值 | 0.0001865 | 0.0001066 |

GSH-Px

| 格式: 列 | 组 A         | 组 B         |
|-------|-------------|-------------|
|       | Con         | DOX         |
| 1     | 0.309686445 | 0.107101366 |
| 2     | 0.338544448 | 0.148452906 |
| 3     | 0.359813874 | 0.135419239 |
| 4     | 0.379903288 | 0.141234147 |

| 描述性统计    | A       | B        |
|----------|---------|----------|
|          | Con     | DOX      |
| 值的数目     | 4       | 4        |
| 最小       | 0.3097  | 0.1071   |
| 最大值      | 0.3799  | 0.1485   |
| 范围       | 0.07022 | 0.04135  |
| 平均: mean | 0.3470  | 0.1331   |
| 标准偏差 SD  | 0.03006 | 0.01810  |
| 标准误差的平均值 | 0.01503 | 0.009052 |

MDA

| 格式: 列 | 组 A         | 组 B         |
|-------|-------------|-------------|
|       | Con         | DOX         |
| 1     | 0.004240398 | 0.008198603 |
| 2     | 0.004653456 | 0.007523505 |
| 3     | 0.003994748 | 0.007390016 |
| 4     | 0.004438287 | 0.006963769 |

| 描述性统计    | A         | B         |
|----------|-----------|-----------|
|          | Con       | DOX       |
| 值的数目     | 4         | 4         |
| 最小       | 0.003995  | 0.006964  |
| 最大值      | 0.004653  | 0.008199  |
| 范围       | 0.0006587 | 0.001235  |
| 平均: mean | 0.004332  | 0.007519  |
| 标准偏差 SD  | 0.0002809 | 0.0005121 |
| 标准误差的平均值 | 0.0001405 | 0.0002561 |

NADPH

| 格式: 列 | 组 A         | 组 B         |
|-------|-------------|-------------|
|       | Con         | DOX         |
| 1     | 0.000413339 | 0.002508246 |
| 2     | 0.000419321 | 0.002661953 |
| 3     | 0.000405097 | 0.002226949 |
| 4     | 0.000450453 | 0.002327293 |

| 描述性统计    | A          | B          |
|----------|------------|------------|
|          | Con        | DOX        |
| 值的数目     | 4          | 4          |
| 最小       | 0.0004051  | 0.002227   |
| 最大值      | 0.0004505  | 0.002662   |
| 范围       | 4.536e-005 | 0.0004350  |
| 平均: mean | 0.0004221  | 0.002431   |
| 标准偏差 SD  | 1.981e-005 | 0.0001930  |
| 标准误差的平均值 | 9.906e-006 | 9.648e-005 |

**E**

| 格式: | 组 A  | 组 B   |
|-----|------|-------|
| 列   | Con  | DOX   |
| 1   | 4.01 | 25.41 |
| 2   | 4.58 | 32.06 |
| 3   | 5.02 | 32.48 |

| 描述性统计    | A          | B     |
|----------|------------|-------|
|          | Con        | DOX   |
| 值的数目     | 3          | 3     |
| 最小       | 4.010      | 25.41 |
| 最大值      | 5.020      | 32.48 |
| 范围       | 1.010      | 7.070 |
| 平均:      | mean 4.537 | 29.98 |
| 标准偏差     | SD 0.5064  | 3.966 |
| 标准误差的平均值 | 0.2924     | 2.290 |

**F**

| 格式: | 组 A | 组 B   |
|-----|-----|-------|
| 列   | Con | DOX   |
| 1   | 7   | 33.00 |
| 2   | 8   | 28.00 |
| 3   | 2   | 26.00 |

| 描述性统计    | A          | B     |
|----------|------------|-------|
|          | Con        | DOX   |
| 值的数目     | 3          | 3     |
| 最小       | 2.000      | 26.00 |
| 最大值      | 8.000      | 33.00 |
| 范围       | 6.000      | 7.000 |
| 平均:      | mean 5.667 | 29.00 |
| 标准偏差     | SD 3.215   | 3.606 |
| 标准误差的平均值 | 1.856      | 2.082 |

**Fig 2**

**A**

**Bax**

| 格式: | 组 A         | 组 B         |
|-----|-------------|-------------|
| 列   | Con         | DOX         |
| 1   | 0.946545799 | 1.450255968 |
| 2   | 0.961567047 | 1.886270339 |
| 3   | 1.091887155 | 1.667956682 |

**Bcl-2**

| 格式: | 组 A         | 组 B         |
|-----|-------------|-------------|
| 列   | Con         | DOX         |
| 1   | 0.957353452 | 0.690052429 |
| 2   | 0.956281894 | 0.638543771 |
| 3   | 1.086364654 | 0.497948231 |

**Cleaved Caspase3/Caspase3**

| 格式: | 组 A         | 组 B         |
|-----|-------------|-------------|
| 列   | Con         | DOX         |
| 1   | 1.489647148 | 3.296204145 |
| 2   | 0.889779701 | 9.521978745 |
| 3   | 0.620573151 | 3.488335729 |

| 描述性统计    | A          | B      |
|----------|------------|--------|
|          | Con        | DOX    |
| 值的数目     | 3          | 3      |
| 最小       | 0.9465     | 1.450  |
| 最大值      | 1.092      | 1.886  |
| 范围       | 0.1453     | 0.4360 |
| 平均:      | mean 1.000 | 1.668  |
| 标准偏差     | SD 0.07993 | 0.2180 |
| 标准误差的平均值 | 0.04615    | 0.1259 |

| 描述性统计    | A          | B       |
|----------|------------|---------|
|          | Con        | DOX     |
| 值的数目     | 3          | 3       |
| 最小       | 0.9563     | 0.4979  |
| 最大值      | 1.086      | 0.6901  |
| 范围       | 0.1301     | 0.1921  |
| 平均:      | mean 1.000 | 0.6088  |
| 标准偏差     | SD 0.07480 | 0.09944 |
| 标准误差的平均值 | 0.04318    | 0.05741 |

| 描述性统计    | A          | B      |
|----------|------------|--------|
|          | Con        | DOX    |
| 值的数目     | 3          | 3      |
| 最小       | 0.6206     | 8.296  |
| 最大值      | 1.490      | 9.522  |
| 范围       | 0.8691     | 1.226  |
| 平均:      | mean 1.000 | 8.769  |
| 标准偏差     | SD 0.4449  | 0.6593 |
| 标准误差的平均值 | 0.2569     | 0.3806 |

**B**

| 组 A         | 组 B         |
|-------------|-------------|
| Con         | DOX         |
| 0.202195369 | 8.334759118 |
| 0.246858957 | 7.825035902 |
| 0.262196058 | 3.154836863 |
| 0.241702087 | 7.890690844 |

| 描述性统计    | A           | B      |
|----------|-------------|--------|
|          | Con         | DOX    |
| 值的数目     | 4           | 4      |
| 最小       | 0.2022      | 7.825  |
| 最大值      | 0.2622      | 8.335  |
| 范围       | 0.06000     | 0.5097 |
| 平均:      | mean 0.2382 | 8.051  |
| 标准偏差     | SD 0.02556  | 0.2367 |
| 标准误差的平均值 | 0.01278     | 0.1183 |

**C**

| 组 A         | 组 B         |
|-------------|-------------|
| Con         | DOX         |
| 184.9890732 | 59.33256962 |
| 173.0679532 | 51.44954740 |
| 195.1513394 | 49.97245250 |
| 180.6733672 | 56.59605697 |

| 描述性统计    | A          | B     |
|----------|------------|-------|
|          | Con        | DOX   |
| 值的数目     | 4          | 4     |
| 最小       | 173.1      | 49.97 |
| 最大值      | 195.2      | 59.33 |
| 范围       | 22.08      | 9.360 |
| 平均:      | mean 183.5 | 54.34 |
| 标准偏差     | SD 9.216   | 4.376 |
| 标准误差的平均值 | 4.608      | 2.188 |

**E**

**p-AMPK/AMPK**

| 组 A         | 组 B         |
|-------------|-------------|
| Con         | DOX         |
| 1.011378050 | 0.493984011 |
| 0.976472751 | 0.462155356 |
| 1.012149199 | 0.623194641 |

| 描述性统计    | A          | B       |
|----------|------------|---------|
|          | Con        | DOX     |
| 值的数目     | 3          | 3       |
| 最小       | 0.9765     | 0.4622  |
| 最大值      | 1.012      | 0.6232  |
| 范围       | 0.03568    | 0.1610  |
| 平均:      | mean 1.000 | 0.5264  |
| 标准偏差     | SD 0.02038 | 0.08529 |
| 标准误差的平均值 | 0.01177    | 0.04924 |

**UCP2**

| 组 A         | 组 B         |
|-------------|-------------|
| Con         | DOX         |
| 1.059882154 | 0.428420877 |
| 1.025840100 | 0.612741219 |
| 0.914277746 | 0.515509362 |

| 描述性统计    | A          | B       |
|----------|------------|---------|
|          | Con        | DOX     |
| 值的数目     | 3          | 3       |
| 最小       | 0.9143     | 0.4284  |
| 最大值      | 1.060      | 0.6127  |
| 范围       | 0.1456     | 0.1843  |
| 平均:      | mean 1.000 | 0.5189  |
| 标准偏差     | SD 0.07616 | 0.09221 |
| 标准误差的平均值 | 0.04397    | 0.05324 |

Fig 3

A

| 组 A           | 组 B           | 组 C           | 组 D           | 组 E          | 组 F          |
|---------------|---------------|---------------|---------------|--------------|--------------|
| Con           | 30            | 50            | 100           | 300          | 500          |
| 101.665585500 | 103.491367900 | 99.549336660  | 98.055486350  | 92.941483050 | 90.607175890 |
| 94.342609100  | 95.051064110  | 90.724696080  | 91.435859880  | 95.075705060 | 91.550307920 |
| 105.522393800 | 106.193759100 | 103.750214400 | 103.713020500 | 95.535418130 | 90.064322240 |
| 98.469411610  | 99.522352860  | 98.443625930  | 94.917447410  | 99.892938640 | 96.298102500 |

| 描述性统计    | A          | B     | C     | D     | E     | F     |
|----------|------------|-------|-------|-------|-------|-------|
|          | Con        | 30    | 50    | 100   | 300   | 500   |
| 值的数目     | 4          | 4     | 4     | 4     | 4     | 4     |
| 最小       | 94.34      | 95.05 | 90.72 | 91.44 | 85.08 | 81.55 |
| 最大值      | 105.5      | 106.2 | 103.8 | 103.7 | 95.54 | 90.61 |
| 范围       | 11.18      | 11.14 | 13.03 | 12.28 | 10.46 | 9.057 |
| 平均:      | mean 100.0 | 101.1 | 98.12 | 97.03 | 90.86 | 87.13 |
| 标准偏差     | SD 4.748   | 4.856 | 5.433 | 5.211 | 4.494 | 4.184 |
| 标准误差的平均值 | 2.374      | 2.428 | 2.716 | 2.606 | 2.247 | 2.092 |

B

| 组 A           | 组 B          | 组 C          | 组 D          | 组 E          | 组 F          | 组 G          |
|---------------|--------------|--------------|--------------|--------------|--------------|--------------|
| Con           | 0            | 30           | 50           | 100          | 300          | 500          |
| 95.075040640  | 55.787361130 | 52.077956690 | 35.195333340 | 74.932764580 | 35.824154610 | 59.919378370 |
| 103.198433400 | 57.999398840 | 35.833012700 | 89.119470210 | 76.082089690 | 59.653376460 | 53.751501120 |
| 98.912565020  | 49.064998100 | 57.466151770 | 58.507107650 | 39.488039560 | 56.987348330 | 52.037174480 |
| 102.813960900 | 52.346430840 | 58.688620930 | 53.152687300 | 71.218321130 | 59.897777050 | 58.718924950 |

| 描述性统计    | A          | B     | C     | D     | E     | F     | G     |
|----------|------------|-------|-------|-------|-------|-------|-------|
|          | Con        | 0     | 30    | 50    | 100   | 300   | 500   |
| 值的数目     | 4          | 4     | 4     | 4     | 4     | 4     | 4     |
| 最小       | 95.08      | 49.06 | 57.47 | 58.51 | 69.49 | 56.99 | 52.04 |
| 最大值      | 103.2      | 58.00 | 65.83 | 69.12 | 76.08 | 65.82 | 59.92 |
| 范围       | 8.123      | 8.934 | 8.367 | 10.61 | 6.594 | 8.837 | 7.882 |
| 平均:      | mean 100.0 | 53.80 | 61.02 | 63.99 | 72.93 | 60.59 | 56.11 |
| 标准偏差     | SD 3.812   | 3.921 | 3.757 | 4.417 | 3.094 | 3.730 | 3.806 |
| 标准误差的平均值 | 1.906      | 1.960 | 1.879 | 2.208 | 1.547 | 1.865 | 1.903 |

C

| 组 A           | 组 B          | 组 C           | 组 D          |
|---------------|--------------|---------------|--------------|
| Con           | DOX          | AP39          | DOX+AP39     |
| 102.360293900 | 51.979388560 | 102.611206300 | 74.885655280 |
| 101.775915000 | 52.412364150 | 104.882093600 | 73.921115890 |
| 96.722998270  | 50.395639370 | 100.007773300 | 72.302806650 |
| 99.140792900  | 50.613996010 | 107.156122800 | 72.945471780 |

| 描述性统计    | A          | B      | C     | D        |
|----------|------------|--------|-------|----------|
|          | Con        | DOX    | AP39  | DOX+AP39 |
| 值的数目     | 4          | 4      | 4     | 4        |
| 最小       | 96.72      | 50.40  | 100.0 | 72.30    |
| 最大值      | 102.4      | 52.41  | 107.2 | 74.89    |
| 范围       | 5.637      | 2.017  | 7.148 | 2.583    |
| 平均:      | mean 100.0 | 51.35  | 103.7 | 73.51    |
| 标准偏差     | SD 2.595   | 0.9962 | 3.063 | 1.131    |
| 标准误差的平均值 | 1.297      | 0.4981 | 1.532 | 0.5655   |

D

| 组 A         | 组 B         | 组 C         | 组 D         |
|-------------|-------------|-------------|-------------|
| Con         | DOX         | AP39        | DOX+AP39    |
| 0.095506706 | 0.074498288 | 0.110346538 | 0.085914794 |
| 0.096571181 | 0.074772719 | 0.110001094 | 0.081192344 |
| 0.097345788 | 0.073172088 | 0.111626188 | 0.085875013 |
| 0.096186431 | 0.076132406 | 0.112589725 | 0.088493569 |

| 描述性统计    | A            | B         | C         | D        |
|----------|--------------|-----------|-----------|----------|
|          | Con          | DOX       | AP39      | DOX+AP39 |
| 值的数目     | 4            | 4         | 4         | 4        |
| 最小       | 0.09551      | 0.07317   | 0.1100    | 0.08119  |
| 最大值      | 0.09735      | 0.07613   | 0.1126    | 0.08849  |
| 范围       | 0.001839     | 0.002960  | 0.002589  | 0.007301 |
| 平均:      | mean 0.09640 | 0.07464   | 0.1111    | 0.08537  |
| 标准偏差     | SD 0.0007675 | 0.001214  | 0.001192  | 0.003042 |
| 标准误差的平均值 | 0.0003838    | 0.0006069 | 0.0005962 | 0.001521 |

E

| 组 A         | 组 B         | 组 C         | 组 D         |
|-------------|-------------|-------------|-------------|
| Con         | DOX         | AP39        | DOX+AP39    |
| 1.163681973 | 2.620592642 | 0.962911992 | 2.042976099 |
| 1.115819455 | 2.668890670 | 0.958034283 | 2.150808306 |
| 1.061816250 | 2.553567696 | 0.934386105 | 1.929308062 |
| 1.015695770 | 2.674682949 | 0.991873389 | 2.098503589 |
| 0.642986651 | 2.666538917 | 0.903813323 | 1.902175807 |

| 描述性统计    | A          | B       | C       | D        |
|----------|------------|---------|---------|----------|
|          | Con        | DOX     | AP39    | DOX+AP39 |
| 值的数目     | 5          | 5       | 5       | 5        |
| 最小       | 0.6430     | 2.554   | 0.9038  | 1.902    |
| 最大值      | 1.164      | 2.675   | 0.9919  | 2.151    |
| 范围       | 0.5207     | 0.1211  | 0.08806 | 0.2486   |
| 平均:      | mean 1.000 | 2.637   | 0.9502  | 2.025    |
| 标准偏差     | SD 0.2072  | 0.05133 | 0.03302 | 0.1070   |
| 标准误差的平均值 | 0.09266    | 0.02296 | 0.01477 | 0.04785  |

F

SOD

| 组 A         | 组 B         | 组 C         | 组 D         |
|-------------|-------------|-------------|-------------|
| Con         | DOX         | AP39        | DOX+AP39    |
| 0.008662683 | 0.004039753 | 0.008770934 | 0.005782701 |
| 0.008434927 | 0.003726106 | 0.009064018 | 0.005843556 |
| 0.008747237 | 0.003969615 | 0.008797399 | 0.005937367 |
| 0.008344061 | 0.004364445 | 0.008921801 | 0.006052590 |

| 描述性统计    | A             | B         | C          | D          |
|----------|---------------|-----------|------------|------------|
|          | Con           | DOX       | AP39       | DOX+AP39   |
| 值的数目     | 4             | 4         | 4          | 4          |
| 最小       | 0.008344      | 0.003726  | 0.008771   | 0.005783   |
| 最大值      | 0.008747      | 0.004364  | 0.009064   | 0.006053   |
| 范围       | 0.0004032     | 0.0006383 | 0.0002931  | 0.0002699  |
| 平均:      | mean 0.008547 | 0.004025  | 0.008889   | 0.005904   |
| 标准偏差     | SD 0.0001891  | 0.0002632 | 0.0001342  | 0.0001177  |
| 标准误差的平均值 | 9.453e-005    | 0.0001316 | 6.710e-005 | 5.885e-005 |



## GSH-Px

| 组 A         | 组 B         | 组 C         | 组 D         |
|-------------|-------------|-------------|-------------|
| Con         | DOX         | AP39        | DOX+AP39    |
| 0.314506250 | 0.128025303 | 0.368224811 | 0.246649433 |
| 0.350539217 | 0.127896354 | 0.377489736 | 0.236411301 |
| 0.365825857 | 0.133115173 | 0.368195614 | 0.227367781 |
| 0.380470180 | 0.144109972 | 0.376883915 | 0.230365257 |

| 描述性统计    | A       | B        | C        | D        |
|----------|---------|----------|----------|----------|
|          | Con     | DOX      | AP39     | DOX+AP39 |
| 值的数目     | 4       | 4        | 4        | 4        |
| 最小       | 0.3145  | 0.1279   | 0.3682   | 0.2274   |
| 最大值      | 0.3805  | 0.1441   | 0.3775   | 0.2466   |
| 范围       | 0.06596 | 0.01621  | 0.009294 | 0.01928  |
| 平均:      | 0.3528  | 0.1333   | 0.3727   | 0.2352   |
| 标准偏差     | 0.02832 | 0.007614 | 0.005189 | 0.008510 |
| 标准误差的平均值 | 0.01416 | 0.003807 | 0.002594 | 0.004255 |

## MDA

| 组 A         | 组 B         | 组 C         | 组 D         |
|-------------|-------------|-------------|-------------|
| Con         | DOX         | AP39        | DOX+AP39    |
| 0.004187993 | 0.006960833 | 0.003925050 | 0.006247346 |
| 0.004596085 | 0.008002611 | 0.004610633 | 0.005750039 |
| 0.003925966 | 0.007038903 | 0.004459123 | 0.006037115 |
| 0.004360329 | 0.007520486 | 0.004342249 | 0.006603038 |

| 描述性统计    | A         | B         | C         | D         |
|----------|-----------|-----------|-----------|-----------|
|          | Con       | DOX       | AP39      | DOX+AP39  |
| 值的数目     | 4         | 4         | 4         | 4         |
| 最小       | 0.003926  | 0.006961  | 0.003925  | 0.005750  |
| 最大值      | 0.004596  | 0.008003  | 0.004611  | 0.006603  |
| 范围       | 0.0006701 | 0.001042  | 0.0006856 | 0.0008530 |
| 平均:      | 0.004268  | 0.007381  | 0.004334  | 0.006159  |
| 标准偏差     | 0.0002826 | 0.0004828 | 0.0002941 | 0.0003592 |
| 标准误差的平均值 | 0.0001413 | 0.0002414 | 0.0001471 | 0.0001796 |

## NADPH

| 组 A         | 组 B         | 组 C         | 组 D         |
|-------------|-------------|-------------|-------------|
| Con         | DOX         | AP39        | DOX+AP39    |
| 0.000435311 | 0.002320110 | 0.000491994 | 0.001751581 |
| 0.000409971 | 0.002444310 | 0.000470046 | 0.001743856 |
| 0.000480455 | 0.002446665 | 0.000417413 | 0.001846178 |
| 0.000471506 | 0.002511567 | 0.000407499 | 0.001863040 |

| 描述性统计    | A          | B          | C          | D          |
|----------|------------|------------|------------|------------|
|          | Con        | DOX        | AP39       | DOX+AP39   |
| 值的数目     | 4          | 4          | 4          | 4          |
| 最小       | 0.0004100  | 0.002320   | 0.0004075  | 0.001744   |
| 最大值      | 0.0004805  | 0.002512   | 0.0004920  | 0.001863   |
| 范围       | 7.048e-005 | 0.0001915  | 8.450e-005 | 0.0001192  |
| 平均:      | 0.0004493  | 0.002431   | 0.0004467  | 0.001801   |
| 标准偏差     | 3.269e-005 | 8.002e-005 | 4.079e-005 | 6.218e-005 |
| 标准误差的平均值 | 1.635e-005 | 4.001e-005 | 2.039e-005 | 3.109e-005 |

## G

| 组 A  | 组 B   | 组 C  | 组 D      |
|------|-------|------|----------|
| Con  | DOX   | AP39 | DOX+AP39 |
| 4.16 | 27.35 | 4.21 | 18.77    |
| 5.26 | 32.47 | 5.28 | 18.97    |
| 4.60 | 34.02 | 5.41 | 21.67    |

| 描述性统计    | A      | B     | C      | D        |
|----------|--------|-------|--------|----------|
|          | Con    | DOX   | AP39   | DOX+AP39 |
| 值的数目     | 3      | 3     | 3      | 3        |
| 最小       | 4.160  | 27.35 | 4.210  | 18.77    |
| 最大值      | 5.260  | 34.02 | 5.410  | 21.67    |
| 范围       | 1.100  | 6.670 | 1.200  | 2.900    |
| 平均:      | 4.673  | 31.28 | 4.967  | 19.80    |
| 标准偏差     | 0.5537 | 3.491 | 0.6585 | 1.620    |
| 标准误差的平均值 | 0.3197 | 2.015 | 0.3802 | 0.9351   |

## H

| 组 A | 组 B | 组 C  | 组 D      |
|-----|-----|------|----------|
| Con | DOX | AP39 | DOX+AP39 |
| 8   | 29  | 3    | 20       |
| 6   | 26  | 7    | 18       |
| 5   | 30  | 8    | 15       |

| 描述性统计    | A      | B     | C     | D        |
|----------|--------|-------|-------|----------|
|          | Con    | DOX   | AP39  | DOX+AP39 |
| 值的数目     | 3      | 3     | 3     | 3        |
| 最小       | 5.000  | 26.00 | 3.000 | 15.00    |
| 最大值      | 8.000  | 30.00 | 8.000 | 20.00    |
| 范围       | 3.000  | 4.000 | 5.000 | 5.000    |
| 平均:      | 6.333  | 28.33 | 6.000 | 17.67    |
| 标准偏差     | 1.528  | 2.082 | 2.646 | 2.517    |
| 标准误差的平均值 | 0.8819 | 1.202 | 1.528 | 1.453    |

## Fig 4

## Bax

| 组 A         | 组 B         | 组 C         | 组 D         |
|-------------|-------------|-------------|-------------|
| Con         | DOX         | AP39        | DOX+AP39    |
| 0.998934345 | 1.430962643 | 1.087204428 | 1.266941735 |
| 0.898009767 | 1.552209129 | 0.940565648 | 1.107945076 |
| 1.014655710 | 1.601159589 | 1.043117903 | 1.143760160 |
| 1.088400178 | 1.628349928 | 0.974901411 | 1.189940389 |

| 描述性统计    | A       | B       | C       | D        |
|----------|---------|---------|---------|----------|
|          | Con     | DOX     | AP39    | DOX+AP39 |
| 值的数目     | 4       | 4       | 4       | 4        |
| 最小       | 0.8980  | 1.431   | 0.9406  | 1.108    |
| 最大值      | 1.088   | 1.628   | 1.087   | 1.267    |
| 范围       | 0.1904  | 0.1974  | 0.1466  | 0.1590   |
| 平均:      | 1.000   | 1.553   | 1.011   | 1.177    |
| 标准偏差     | 0.07838 | 0.08735 | 0.06609 | 0.06863  |
| 标准误差的平均值 | 0.03919 | 0.04368 | 0.03304 | 0.03432  |



## Bcl-2

| 组 A         | 组 B         | 组 C         | 组 D         |
|-------------|-------------|-------------|-------------|
| Con         | DOX         | AP39        | DOX+AP39    |
| 1.075392362 | 0.431691066 | 1.033282780 | 0.745468940 |
| 1.018960414 | 0.582901429 | 0.976361139 | 0.839983301 |
| 0.905647224 | 0.659036235 | 0.962775383 | 0.723265620 |

| 描述性统计    | A          | B       | C       | D        |
|----------|------------|---------|---------|----------|
|          | Con        | DOX     | AP39    | DOX+AP39 |
| 值的数目     | 3          | 3       | 3       | 3        |
| 最小       | 0.9056     | 0.4317  | 0.9628  | 0.7233   |
| 最大值      | 1.075      | 0.6590  | 1.033   | 0.8400   |
| 范围       | 0.1697     | 0.2273  | 0.07051 | 0.1167   |
| 平均:      | mean 1.000 | 0.5579  | 0.9908  | 0.7696   |
| 标准偏差     | SD 0.08645 | 0.1157  | 0.03741 | 0.06198  |
| 标准误差的平均值 | 0.04991    | 0.06681 | 0.02160 | 0.03578  |

## Cleaved Caspase3/Caspase3

| 组 A         | 组 B         | 组 C         | 组 D         |
|-------------|-------------|-------------|-------------|
| Con         | DOX         | AP39        | DOX+AP39    |
| 1.417580065 | 7.451957476 | 1.522590091 | 3.685303216 |
| 0.880855447 | 7.135381649 | 0.669622225 | 4.427313878 |
| 1.067119093 | 7.697713503 | 1.403710746 | 5.193526113 |
| 0.634445395 | 7.599233420 | 0.370853436 | 3.154284733 |

| 描述性统计    | A          | B      | C      | D        |
|----------|------------|--------|--------|----------|
|          | Con        | DOX    | AP39   | DOX+AP39 |
| 值的数目     | 4          | 4      | 4      | 4        |
| 最小       | 0.6344     | 7.135  | 0.3709 | 3.154    |
| 最大值      | 1.418      | 7.698  | 1.523  | 5.194    |
| 范围       | 0.7831     | 0.5623 | 1.152  | 2.039    |
| 平均:      | mean 1.000 | 7.471  | 0.9917 | 4.115    |
| 标准偏差     | SD 0.3300  | 0.2455 | 0.5600 | 0.8885   |
| 标准误差的平均值 | 0.1650     | 0.1228 | 0.2800 | 0.4443   |

## B

| 组 A         | 组 B         | 组 C         | 组 D         |
|-------------|-------------|-------------|-------------|
| Con         | DOX         | AP39        | DOX+AP39    |
| 0.191405059 | 7.863583001 | 0.147899971 | 3.389454340 |
| 0.193911106 | 7.716663156 | 0.128900214 | 3.083059211 |
| 0.215355805 | 7.732113145 | 0.132252320 | 2.966009989 |
| 0.182854719 | 8.164694280 | 0.162479407 | 2.851950061 |

| 描述性统计    | A           | B      | C        | D        |
|----------|-------------|--------|----------|----------|
|          | Con         | DOX    | AP39     | DOX+AP39 |
| 值的数目     | 4           | 4      | 4        | 4        |
| 最小       | 0.1829      | 7.717  | 0.1289   | 2.852    |
| 最大值      | 0.2154      | 8.165  | 0.1625   | 3.389    |
| 范围       | 0.03250     | 0.4480 | 0.03358  | 0.5375   |
| 平均:      | mean 0.1959 | 7.869  | 0.1429   | 3.073    |
| 标准偏差     | SD 0.01382  | 0.2077 | 0.01547  | 0.2313   |
| 标准误差的平均值 | 0.006909    | 0.1038 | 0.007734 | 0.1157   |

## C

| 组 A         | 组 B         | 组 C         | 组 D          |
|-------------|-------------|-------------|--------------|
| Con         | DOX         | AP39        | DOX+AP39     |
| 176.3739469 | 56.54941187 | 165.5965266 | 92.62950860  |
| 194.0927700 | 51.44954740 | 176.3092403 | 104.84477020 |
| 165.1205399 | 58.41521595 | 153.9293469 | 99.97775191  |
| 189.8422067 | 49.97245250 | 170.9412029 | 97.40977078  |

| 描述性统计    | A          | B     | C     | D        |
|----------|------------|-------|-------|----------|
|          | Con        | DOX   | AP39  | DOX+AP39 |
| 值的数目     | 4          | 4     | 4     | 4        |
| 最小       | 165.1      | 49.97 | 153.9 | 92.63    |
| 最大值      | 194.1      | 58.42 | 176.3 | 104.8    |
| 范围       | 28.97      | 8.443 | 22.38 | 12.22    |
| 平均:      | mean 181.4 | 54.10 | 166.7 | 98.72    |
| 标准偏差     | SD 13.20   | 4.028 | 9.568 | 5.096    |
| 标准误差的平均值 | 6.600      | 2.014 | 4.784 | 2.548    |

## E

### p-AMPK/AMPK

| 组 A         | 组 B         | 组 C         | 组 D         |
|-------------|-------------|-------------|-------------|
| Con         | DOX         | AP39        | DOX+AP39    |
| 1.092081041 | 0.334754020 | 0.838035357 | 0.445305054 |
| 0.953486373 | 0.259550019 | 0.791336761 | 0.564518382 |
| 0.954432585 | 0.256161698 | 0.882477412 | 0.582489985 |

| 描述性统计    | A          | B       | C       | D        |
|----------|------------|---------|---------|----------|
|          | Con        | DOX     | AP39    | DOX+AP39 |
| 值的数目     | 3          | 3       | 3       | 3        |
| 最小       | 0.9535     | 0.2562  | 0.7913  | 0.4453   |
| 最大值      | 1.092      | 0.3348  | 0.8825  | 0.5825   |
| 范围       | 0.1386     | 0.07859 | 0.09114 | 0.1372   |
| 平均:      | mean 1.000 | 0.2835  | 0.8373  | 0.5308   |
| 标准偏差     | SD 0.07975 | 0.04443 | 0.04557 | 0.07456  |
| 标准误差的平均值 | 0.04604    | 0.02565 | 0.02631 | 0.04305  |

## UCP2

| 组 A         | 组 B         | 组 C         | 组 D         |
|-------------|-------------|-------------|-------------|
| Con         | DOX         | AP39        | DOX+AP39    |
| 0.941573659 | 0.559152881 | 0.953887231 | 0.743254192 |
| 0.950116790 | 0.560781617 | 1.100970179 | 0.952714602 |
| 1.117190059 | 0.704942782 | 0.968243341 | 0.776004365 |
| 0.991119492 | 0.663468423 | 0.954673888 | 0.840861334 |

| 描述性统计    | A          | B       | C       | D        |
|----------|------------|---------|---------|----------|
|          | Con        | DOX     | AP39    | DOX+AP39 |
| 值的数目     | 4          | 4       | 4       | 4        |
| 最小       | 0.9416     | 0.5592  | 0.9539  | 0.7433   |
| 最大值      | 1.117      | 0.7049  | 1.101   | 0.9527   |
| 范围       | 0.1756     | 0.1458  | 0.1471  | 0.2095   |
| 平均:      | mean 1.000 | 0.6221  | 0.9944  | 0.8282   |
| 标准偏差     | SD 0.08106 | 0.07370 | 0.07132 | 0.09238  |
| 标准误差的平均值 | 0.04053    | 0.03685 | 0.03566 | 0.04619  |

Fig 5

A

AMPK

| 组 A         | 组 B         |
|-------------|-------------|
| Con         | CC          |
| 0.977696788 | 0.684741592 |
| 0.985608687 | 0.753948770 |
| 1.036694526 | 0.680053137 |

| 描述性统计    | A       | B       |
|----------|---------|---------|
|          | Con     | CC      |
| 值的数目     | 3       | 3       |
| 最小       | 0.9777  | 0.6801  |
| 最大值      | 1.037   | 0.7539  |
| 范围       | 0.05900 | 0.07390 |
| 平均: mean | 1.000   | 0.7062  |
| 标准偏差 SD  | 0.03202 | 0.04138 |
| 标准误差的平均值 | 0.01849 | 0.02389 |

p-AMPK/AMPK

| 组 A         | 组 B         |
|-------------|-------------|
| Con         | CC          |
| 1.063703007 | 0.409524977 |
| 1.027935355 | 0.321809239 |
| 0.908361638 | 0.311172409 |

| 描述性统计    | A       | B       |
|----------|---------|---------|
|          | Con     | CC      |
| 值的数目     | 3       | 3       |
| 最小       | 0.9084  | 0.3112  |
| 最大值      | 1.064   | 0.4095  |
| 范围       | 0.1553  | 0.09835 |
| 平均: mean | 1.000   | 0.3475  |
| 标准偏差 SD  | 0.08135 | 0.05398 |
| 标准误差的平均值 | 0.04697 | 0.03116 |

B

| 组 A          | 组 B         | 组 C         | 组 D         | 组 E         | 组 F         |
|--------------|-------------|-------------|-------------|-------------|-------------|
| Con          | DOX         | DOX+AP39    | CC          | DOX+CC      | DOX+AP39+CC |
| 106.0977452  | 53.90865971 | 79.00711121 | 99.81176921 | 45.31292004 | 43.37396969 |
| 96.84739398  | 48.57633311 | 73.05043919 | 90.32312553 | 39.02646448 | 37.99741619 |
| 103.03516490 | 50.55919066 | 77.61353727 | 97.64097394 | 43.59259983 | 45.07617286 |
| 94.01969589  | 48.17466752 | 73.75007693 | 96.76951999 | 39.80352595 | 39.89677546 |

| 描述性统计    | A     | B     | C        | D     | E      | F           |
|----------|-------|-------|----------|-------|--------|-------------|
|          | Con   | DOX   | DOX+AP39 | CC    | DOX+CC | DOX+AP39+CC |
| 值的数目     | 4     | 4     | 4        | 4     | 4      | 4           |
| 最小       | 94.02 | 48.17 | 73.05    | 86.77 | 39.03  | 38.00       |
| 最大值      | 106.1 | 53.91 | 79.01    | 99.81 | 45.31  | 45.08       |
| 范围       | 12.08 | 5.734 | 5.957    | 13.04 | 6.286  | 7.079       |
| 平均: mean | 100.0 | 50.30 | 75.86    | 93.64 | 41.93  | 41.59       |
| 标准偏差 SD  | 5.541 | 2.619 | 2.905    | 6.118 | 3.009  | 3.220       |
| 标准误差的平均值 | 2.770 | 1.310 | 1.453    | 3.059 | 1.504  | 1.610       |

C

| 组 A         | 组 B         | 组 C         | 组 D         | 组 E         | 组 F         |
|-------------|-------------|-------------|-------------|-------------|-------------|
| Con         | DOX         | DOX+AP39    | CC          | DOX+CC      | DOX+AP39+CC |
| 0.849115291 | 2.403452591 | 1.725199528 | 0.937833577 | 2.429502541 | 1.967566574 |
| 1.005697764 | 2.256554903 | 1.473147697 | 1.286697912 | 2.337532430 | 2.407305297 |
| 0.805922564 | 2.152390445 | 1.679391202 | 1.079994910 | 2.574314819 | 2.173880771 |
| 1.064159933 | 2.226334132 | 1.832686503 | 1.110463102 | 2.310952290 | 2.509985225 |
| 1.275104447 | 1.953392856 | 1.615697835 | 0.879512792 | 2.070812037 | 2.195265059 |

| 描述性统计    | A       | B       | C        | D       | E       | F           |
|----------|---------|---------|----------|---------|---------|-------------|
|          | Con     | DOX     | DOX+AP39 | CC      | DOX+CC  | DOX+AP39+CC |
| 值的数目     | 5       | 5       | 5        | 5       | 5       | 5           |
| 最小       | 0.8059  | 1.953   | 1.473    | 0.8795  | 2.071   | 1.968       |
| 最大值      | 1.275   | 2.403   | 1.833    | 1.287   | 2.574   | 2.510       |
| 范围       | 0.4692  | 0.4501  | 0.3595   | 0.4072  | 0.5035  | 0.5424      |
| 平均: mean | 1.000   | 2.198   | 1.665    | 1.059   | 2.345   | 2.251       |
| 标准偏差 SD  | 0.1873  | 0.1646  | 0.1334   | 0.1596  | 0.1845  | 0.2127      |
| 标准误差的平均值 | 0.08374 | 0.07361 | 0.05966  | 0.07136 | 0.08250 | 0.09510     |

D

SOD

| 组 A         | 组 B         | 组 C         | 组 D         | 组 E         | 组 F         |
|-------------|-------------|-------------|-------------|-------------|-------------|
| Con         | DOX         | DOX+AP39    | CC          | DOX+CC      | DOX+AP39+CC |
| 0.008372033 | 0.003743098 | 0.006496933 | 0.008531942 | 0.003398549 | 0.003130384 |
| 0.009346132 | 0.003674752 | 0.005963451 | 0.008650070 | 0.002815713 | 0.003202334 |
| 0.009350484 | 0.003686429 | 0.005853407 | 0.008733845 | 0.003047570 | 0.003187865 |
| 0.009000907 | 0.004067469 | 0.005879233 | 0.008631493 | 0.003466485 | 0.003142135 |

| 描述性统计    | A         | B          | C         | D          | E         | F           |
|----------|-----------|------------|-----------|------------|-----------|-------------|
|          | Con       | DOX        | DOX+AP39  | CC         | DOX+CC    | DOX+AP39+CC |
| 值的数目     | 4         | 4          | 4         | 4          | 4         | 4           |
| 最小       | 0.008372  | 0.003675   | 0.005853  | 0.008532   | 0.002816  | 0.003130    |
| 最大值      | 0.009350  | 0.004067   | 0.006497  | 0.008734   | 0.003466  | 0.003202    |
| 范围       | 0.0009785 | 0.0003927  | 0.0006435 | 0.0002019  | 0.0006508 | 7.195e-005  |
| 平均: mean | 0.009017  | 0.003793   | 0.006048  | 0.008637   | 0.003182  | 0.003166    |
| 标准偏差 SD  | 0.0004604 | 0.0001854  | 0.0003028 | 8.290e-005 | 0.0003055 | 3.477e-005  |
| 标准误差的平均值 | 0.0002302 | 9.272e-005 | 0.0001514 | 4.145e-005 | 0.0001528 | 1.739e-005  |

GSH-Px

| 组 A         | 组 B         | 组 C         | 组 D         | 组 E         | 组 F         |
|-------------|-------------|-------------|-------------|-------------|-------------|
| Con         | DOX         | DOX+AP39    | CC          | DOX+CC      | DOX+AP39+CC |
| 0.312270308 | 0.133852377 | 0.242941516 | 0.340271890 | 0.099936133 | 0.109473313 |
| 0.369485113 | 0.131446124 | 0.222718287 | 0.343230437 | 0.116513001 | 0.090365378 |
| 0.377039628 | 0.148584289 | 0.233953955 | 0.316126638 | 0.111998297 | 0.110094948 |
| 0.375229464 | 0.159781029 | 0.234902831 | 0.330011861 | 0.104355707 | 0.107351480 |

| 描述性统计    | A       | B        | C        | D        | E        | F           |
|----------|---------|----------|----------|----------|----------|-------------|
|          | Con     | DOX      | DOX+AP39 | CC       | DOX+CC   | DOX+AP39+CC |
| 值的数目     | 4       | 4        | 4        | 4        | 4        | 4           |
| 最小       | 0.3123  | 0.1314   | 0.2227   | 0.3161   | 0.09994  | 0.09037     |
| 最大值      | 0.3770  | 0.1598   | 0.2429   | 0.3432   | 0.1165   | 0.1101      |
| 范围       | 0.06477 | 0.02833  | 0.02022  | 0.02710  | 0.01658  | 0.01973     |
| 平均: mean | 0.3585  | 0.1434   | 0.2336   | 0.3324   | 0.1082   | 0.1043      |
| 标准偏差 SD  | 0.03099 | 0.01328  | 0.008317 | 0.01224  | 0.007452 | 0.009378    |
| 标准误差的平均值 | 0.01550 | 0.006641 | 0.004158 | 0.006122 | 0.003726 | 0.004689    |

MDA

| 组 A         | 组 B         | 组 C         | 组 D         | 组 E         | 组 F         |
|-------------|-------------|-------------|-------------|-------------|-------------|
| Con         | DOX         | DOX+AP39    | CC          | DOX+CC      | DOX+AP39+CC |
| 0.003996857 | 0.007587985 | 0.006329899 | 0.004393274 | 0.007574608 | 0.007614365 |
| 0.004263080 | 0.007410385 | 0.005142983 | 0.004534697 | 0.008417132 | 0.007541687 |
| 0.004504240 | 0.006995374 | 0.005853722 | 0.004252870 | 0.007712328 | 0.007392021 |
| 0.003811871 | 0.006828033 | 0.006099312 | 0.004882416 | 0.007382604 | 0.008301755 |

| 描述性统计    | A         | B         | C         | D         | E         | F           |
|----------|-----------|-----------|-----------|-----------|-----------|-------------|
|          | Con       | DOX       | DOX+AP39  | CC        | DOX+CC    | DOX+AP39+CC |
| 值的数目     | 4         | 4         | 4         | 4         | 4         | 4           |
| 最小       | 0.003812  | 0.006828  | 0.005143  | 0.004253  | 0.007383  | 0.007392    |
| 最大值      | 0.004504  | 0.007588  | 0.006330  | 0.004882  | 0.008417  | 0.008302    |
| 范围       | 0.0006924 | 0.0007600 | 0.001187  | 0.0006295 | 0.001035  | 0.0009097   |
| 平均: mean | 0.004144  | 0.007205  | 0.005856  | 0.004516  | 0.007772  | 0.007712    |
| 标准偏差 SD  | 0.0003033 | 0.0003535 | 0.0005139 | 0.0002701 | 0.0004511 | 0.0004036   |
| 标准误差的平均值 | 0.0001516 | 0.0001768 | 0.0002569 | 0.0001351 | 0.0002255 | 0.0002018   |



## NADPH

| 组 A         | 组 B         | 组 C         | 组 D         | 组 E         | 组 F         |
|-------------|-------------|-------------|-------------|-------------|-------------|
| Con         | DOX         | DOX+AP39    | CC          | DOX+CC      | DOX+AP39+CC |
| 0.000429612 | 0.002962820 | 0.001738746 | 0.000490039 | 0.002639605 | 0.002654794 |
| 0.000404838 | 0.002587090 | 0.001741525 | 0.000534524 | 0.002759047 | 0.002937128 |
| 0.000433356 | 0.002532337 | 0.001734366 | 0.000550137 | 0.002919725 | 0.003225325 |
| 0.000437077 | 0.002621260 | 0.001708367 | 0.000523856 | 0.002953942 | 0.002926978 |

| 描述性统计    | A          | B          | C          | D          | E          | F           |
|----------|------------|------------|------------|------------|------------|-------------|
|          | Con        | DOX        | DOX+AP39   | CC         | DOX+CC     | DOX+AP39+CC |
| 值的数目     | 4          | 4          | 4          | 4          | 4          | 4           |
| 最小       | 0.0004048  | 0.002532   | 0.001708   | 0.0004900  | 0.002640   | 0.002855    |
| 最大值      | 0.0004371  | 0.002963   | 0.001742   | 0.0005501  | 0.002954   | 0.003225    |
| 范围       | 3.224e-005 | 0.0004305  | 3.316e-005 | 6.010e-005 | 0.0003143  | 0.0005705   |
| 平均:      | mean       | 0.0004262  | 0.002676   | 0.001731   | 0.0005246  | 0.002818    |
| 标准偏差     | SD         | 1.458e-005 | 0.0001948  | 1.521e-005 | 2.547e-005 | 0.0001462   |
| 标准误差的平均值 |            | 7.289e-006 | 9.739e-005 | 7.605e-006 | 1.273e-005 | 7.310e-005  |

## E

| 组 A  | 组 B   | 组 C      | 组 D  | 组 E    | 组 F         |
|------|-------|----------|------|--------|-------------|
| Con  | DOX   | DOX+AP39 | CC   | DOX+CC | DOX+AP39+CC |
| 4.3  | 27.69 | 20.03    | 5.40 | 40.85  | 36.68       |
| 4.67 | 33.95 | 20.71    | 5.50 | 45.53  | 45.10       |
| 4.94 | 35.60 | 23.63    | 5.21 | 48.45  | 35.66       |

| 描述性统计    | A      | B      | C        | D      | E       | F           |
|----------|--------|--------|----------|--------|---------|-------------|
|          | Con    | DOX    | DOX+AP39 | CC     | DOX+CC  | DOX+AP39+CC |
| 值的数目     | 3      | 3      | 3        | 3      | 3       | 3           |
| 最小       | 4.300  | 27.69  | 20.03    | 5.210  | 40.85   | 35.66       |
| 最大值      | 4.940  | 35.60  | 23.63    | 5.500  | 48.45   | 45.10       |
| 范围       | 0.6400 | 7.910  | 3.600    | 0.2900 | 7.600   | 9.440       |
| 平均:      | mean   | 4.637  | 32.41    | 21.46  | 5.370   | 44.94       |
| 标准偏差     | SD     | 0.3213 | 4.173    | 1.913  | 0.1473  | 3.834       |
| 标准误差的平均值 |        | 0.1855 | 2.409    | 1.104  | 0.08505 | 2.213       |

## F

| 组 A | 组 B | 组 C      | 组 D | 组 E    | 组 F         |
|-----|-----|----------|-----|--------|-------------|
| Con | DOX | DOX+AP39 | CC  | DOX+CC | DOX+AP39+CC |
| 4   | 25  | 18       | 4   | 28     | 30          |
| 4   | 29  | 18       | 5   | 27     | 28          |
| 3   | 27  | 16       | 6   | 31     | 29          |

| 描述性统计    | A     | B      | C        | D      | E      | F           |
|----------|-------|--------|----------|--------|--------|-------------|
|          | Con   | DOX    | DOX+AP39 | CC     | DOX+CC | DOX+AP39+CC |
| 值的数目     | 3     | 3      | 3        | 3      | 3      | 3           |
| 最小       | 3.000 | 25.00  | 16.00    | 4.000  | 27.00  | 28.00       |
| 最大值      | 4.000 | 29.00  | 18.00    | 6.000  | 31.00  | 30.00       |
| 范围       | 1.000 | 4.000  | 2.000    | 2.000  | 4.000  | 2.000       |
| 平均:      | mean  | 3.667  | 27.00    | 17.33  | 5.000  | 28.67       |
| 标准偏差     | SD    | 0.5774 | 2.000    | 1.155  | 1.000  | 2.082       |
| 标准误差的平均值 |       | 0.3333 | 1.155    | 0.6667 | 0.5774 | 1.202       |

## G

### Bax

| 组 A         | 组 B         | 组 C         | 组 D         | 组 E         | 组 F         |
|-------------|-------------|-------------|-------------|-------------|-------------|
| Con         | DOX         | DOX+AP39    | CC          | DOX+CC      | DOX+AP39+CC |
| 1.062085793 | 1.566943957 | 1.101793170 | 1.033025107 | 1.550419151 | 1.392342192 |
| 1.011500301 | 1.455224980 | 1.258150325 | 1.040769760 | 1.622598749 | 1.530982263 |
| 0.926413906 | 1.596537471 | 1.335079013 | 1.260407789 | 1.862647968 | 1.641168993 |

| 描述性统计    | A      | B       | C        | D       | E       | F           |
|----------|--------|---------|----------|---------|---------|-------------|
|          | Con    | DOX     | DOX+AP39 | CC      | DOX+CC  | DOX+AP39+CC |
| 值的数目     | 3      | 3       | 3        | 3       | 3       | 3           |
| 最小       | 0.9264 | 1.455   | 1.102    | 1.033   | 1.550   | 1.392       |
| 最大值      | 1.062  | 1.597   | 1.335    | 1.260   | 1.863   | 1.641       |
| 范围       | 0.1357 | 0.1413  | 0.2333   | 0.2274  | 0.3122  | 0.2488      |
| 平均:      | mean   | 1.000   | 1.540    | 1.232   | 1.111   | 1.679       |
| 标准偏差     | SD     | 0.08856 | 0.07453  | 0.1189  | 0.1291  | 0.1635      |
| 标准误差的平均值 |        | 0.03958 | 0.04303  | 0.06863 | 0.07454 | 0.09438     |

### Bcl-2

| 组 A         | 组 B         | 组 C         | 组 D         | 组 E         | 组 F         |
|-------------|-------------|-------------|-------------|-------------|-------------|
| Con         | DOX         | DOX+AP39    | CC          | DOX+CC      | DOX+AP39+CC |
| 1.004724677 | 0.738160541 | 0.959878623 | 0.913002846 | 0.219669742 | 0.579482219 |
| 0.845367298 | 0.559872228 | 0.979282454 | 1.166424434 | 0.336451136 | 0.395747582 |
| 1.112429299 | 0.707091708 | 0.731967111 | 0.957021593 | 0.269481547 | 0.558348561 |
| 1.037478726 | 0.621466173 | 0.864459816 | 1.014286573 | 0.428607757 | 0.744580602 |

| 描述性统计    | A      | B       | C        | D       | E       | F           |
|----------|--------|---------|----------|---------|---------|-------------|
|          | Con    | DOX     | DOX+AP39 | CC      | DOX+CC  | DOX+AP39+CC |
| 值的数目     | 4      | 4       | 4        | 4       | 4       | 4           |
| 最小       | 0.8454 | 0.5599  | 0.7320   | 0.9130  | 0.2197  | 0.3957      |
| 最大值      | 1.112  | 0.7382  | 0.9793   | 1.166   | 0.4286  | 0.7446      |
| 范围       | 0.2671 | 0.1783  | 0.2473   | 0.2534  | 0.2089  | 0.3488      |
| 平均:      | mean   | 1.000   | 0.6566   | 0.8839  | 1.013   | 0.3136      |
| 标准偏差     | SD     | 0.1125  | 0.08122  | 0.1130  | 0.1106  | 0.09040     |
| 标准误差的平均值 |        | 0.05626 | 0.04061  | 0.05652 | 0.05528 | 0.04520     |

### Cleaved Caspase3/Caspase3

| 组 A         | 组 B         | 组 C         | 组 D         | 组 E         | 组 F         |
|-------------|-------------|-------------|-------------|-------------|-------------|
| Con         | DOX         | DOX+AP39    | CC          | DOX+CC      | DOX+AP39+CC |
| 1.673860988 | 5.536055636 | 3.880118371 | 1.616956860 | 6.858311783 | 5.131797924 |
| 0.654018683 | 5.085797191 | 3.631031237 | 0.662470634 | 7.651676325 | 5.082344220 |
| 0.672120329 | 5.753174633 | 3.789945427 | 0.705268964 | 3.493622293 | 4.767015783 |

| 描述性统计    | A      | B      | C        | D       | E      | F           |
|----------|--------|--------|----------|---------|--------|-------------|
|          | Con    | DOX    | DOX+AP39 | CC      | DOX+CC | DOX+AP39+CC |
| 值的数目     | 3      | 3      | 3        | 3       | 3      | 3           |
| 最小       | 0.6540 | 5.086  | 3.631    | 0.6625  | 6.494  | 4.767       |
| 最大值      | 1.674  | 5.753  | 3.880    | 1.617   | 7.652  | 5.132       |
| 范围       | 1.020  | 0.6674 | 0.2491   | 0.9545  | 1.158  | 0.3648      |
| 平均:      | mean   | 1.000  | 5.458    | 3.767   | 0.9949 | 7.001       |
| 标准偏差     | SD     | 0.5837 | 0.3404   | 0.1261  | 0.5391 | 0.5921      |
| 标准误差的平均值 |        | 0.3370 | 0.1965   | 0.07281 | 0.3113 | 0.3419      |

## H

| 组 A         | 组 B         | 组 C         | 组 D         | 组 E          | 组 F         |
|-------------|-------------|-------------|-------------|--------------|-------------|
| con         | DOX         | DOX+AP39    | CC          | DOX+CC       | DOX+AP39+CC |
| 0.142140612 | 7.279936871 | 2.584880519 | 0.143606592 | 11.699323240 | 8.727992324 |
| 0.120269891 | 7.564222326 | 2.470243674 | 0.116950758 | 7.409899175  | 8.213643178 |
| 0.111414700 | 7.414535120 | 2.150477622 | 0.149867060 | 10.069380870 | 5.813849959 |
| 0.123798238 | 7.404300617 | 2.639016427 | 0.140666777 | 9.100938967  | 6.985873212 |

| 描述性统计    | A       | B        | C        | D       | E        | F           |
|----------|---------|----------|----------|---------|----------|-------------|
|          | con     | DOX      | DOX+AP39 | CC      | DOX+CC   | DOX+AP39+CC |
| 值的数目     | 4       | 4        | 4        | 4       | 4        | 4           |
| 最小       | 0.1114  | 7.280    | 2.150    | 0.1170  | 7.410    | 5.814       |
| 最大值      | 0.1421  | 7.564    | 2.639    | 0.1499  | 11.70    | 8.728       |
| 范围       | 0.03073 | 0.2843   | 0.4885   | 0.03292 | 4.289    | 2.914       |
| 平均:      | mean    | 0.1244   | 7.416    | 2.461   | 0.1378   | 9.570       |
| 标准偏差     | SD      | 0.01292  | 0.1164   | 0.2187  | 0.01440  | 1.795       |
| 标准误差的平均值 |         | 0.006460 | 0.05818  | 0.1094  | 0.007201 | 0.8977      |



I

| 组 A         | 组 B         | 组 C         | 组 D         | 组 E         | 组 F         |
|-------------|-------------|-------------|-------------|-------------|-------------|
| Con         | DOX         | DOX+AP39    | CC          | DOX+CC      | DOX+AP39+CC |
| 175.3503826 | 54.29498912 | 93.43246753 | 174.4442184 | 52.00506289 | 51.58733583 |
| 175.6821715 | 55.98491399 | 94.34627465 | 170.9571747 | 50.37551744 | 51.88842923 |
| 176.9750037 | 56.79624200 | 96.34630532 | 174.2857164 | 49.24235660 | 54.56816049 |
| 179.1888359 | 54.71336858 | 97.31183737 | 171.2588397 | 46.17680555 | 49.79033395 |

| 描述性统计    | A     | B      | C        | D      | E      | F           |
|----------|-------|--------|----------|--------|--------|-------------|
|          | Con   | DOX    | DOX+AP39 | CC     | DOX+CC | DOX+AP39+CC |
| 值的数目     | 4     | 4      | 4        | 4      | 4      | 4           |
| 最小       | 175.4 | 54.29  | 93.43    | 171.0  | 46.18  | 49.79       |
| 最大值      | 179.2 | 56.80  | 97.31    | 174.4  | 52.01  | 54.57       |
| 范围       | 3.838 | 2.501  | 3.879    | 3.487  | 5.828  | 4.778       |
| 平均:      | mean  | 176.8  | 55.45    | 95.36  | 172.7  | 49.45       |
| 标准偏差     | SD    | 1.741  | 1.151    | 1.782  | 1.888  | 2.459       |
| 标准误差的平均值 |       | 0.8703 | 0.5756   | 0.8909 | 0.9428 | 1.230       |

J

| 组 A         | 组 B         | 组 C         | 组 D         | 组 E         | 组 F         |
|-------------|-------------|-------------|-------------|-------------|-------------|
| Con         | DOX         | DOX+AP39    | CC          | DOX+CC      | DOX+AP39+CC |
| 0.977195514 | 0.577961228 | 0.754631683 | 0.748911120 | 0.208517183 | 0.485621343 |
| 0.913412816 | 0.654810115 | 0.790503857 | 0.843334358 | 0.368515235 | 0.605658390 |
| 1.109391670 | 0.583757532 | 0.852648189 | 0.877586788 | 0.393826517 | 0.544962724 |

| 描述性统计    | A      | B       | C        | D       | E       | F           |
|----------|--------|---------|----------|---------|---------|-------------|
|          | Con    | DOX     | DOX+AP39 | CC      | DOX+CC  | DOX+AP39+CC |
| 值的数目     | 3      | 3       | 3        | 3       | 3       | 3           |
| 最小       | 0.9134 | 0.5780  | 0.7546   | 0.7489  | 0.2085  | 0.4856      |
| 最大值      | 1.109  | 0.6548  | 0.8526   | 0.8776  | 0.3938  | 0.6057      |
| 范围       | 0.1960 | 0.07685 | 0.09802  | 0.1287  | 0.1853  | 0.1200      |
| 平均:      | mean   | 1.000   | 0.6055   | 0.7993  | 0.8233  | 0.3236      |
| 标准偏差     | SD     | 0.09996 | 0.04279  | 0.04959 | 0.06684 | 0.1005      |
| 标准误差的平均值 |        | 0.05771 | 0.02471  | 0.02863 | 0.03848 | 0.05801     |

Fig 6

A

| 组 A         | 组 B         | 组 C         |
|-------------|-------------|-------------|
| Con         | NC          | siUCP2      |
| 0.950742278 | 0.879999948 | 0.368179408 |
| 0.999695843 | 0.921643904 | 0.311977624 |
| 1.049561879 | 1.039502657 | 0.313863980 |

| 描述性统计    | A       | B       | C       |
|----------|---------|---------|---------|
|          | Con     | NC      | siUCP2  |
| 值的数目     | 3       | 3       | 3       |
| 最小       | 0.9507  | 0.8800  | 0.3120  |
| 最大值      | 1.050   | 1.040   | 0.3682  |
| 范围       | 0.09882 | 0.1595  | 0.05620 |
| 平均:      | mean    | 1.000   | 0.9470  |
| 标准偏差     | SD      | 0.04941 | 0.08273 |
| 标准误差的平均值 |         | 0.02853 | 0.04776 |

| 组 A | 组 B         | 组 C         |
|-----|-------------|-------------|
| Con | NC          | siUCP2      |
| 1   | 0.986232704 | 0.314253344 |
| 1   | 1.057018041 | 0.314253344 |
| 1   | 1.049716684 | 0.309926925 |

| 描述性统计    | A     | B       | C        |
|----------|-------|---------|----------|
|          | Con   | NC      | siUCP2   |
| 值的数目     | 3     | 3       | 3        |
| 最小       | 1.000 | 0.9862  | 0.3099   |
| 最大值      | 1.000 | 1.057   | 0.3143   |
| 范围       | 0.000 | 0.07079 | 0.004326 |
| 平均:      | mean  | 1.000   | 1.031    |
| 标准偏差     | SD    | 0.000   | 0.03893  |
| 标准误差的平均值 |       | 0.000   | 0.02248  |

B

| 组 A          | 组 B         | 组 C         | 组 D             | 组 E          | 组 F         |
|--------------|-------------|-------------|-----------------|--------------|-------------|
| Con          | DOX         | DOX+AP39    | DOX+AP39+siUCP2 | NC           | siUCP2      |
| 106.32378670 | 57.14878061 | 75.71489713 | 45.32754977     | 102.10102730 | 98.70886030 |
| 98.29999349  | 55.82492175 | 74.25765529 | 39.65855481     | 97.76193915  | 94.23023222 |
| 94.18784172  | 50.33426115 | 71.07477103 | 38.57236613     | 92.99664663  | 88.95441195 |
| 101.18837810 | 53.25152365 | 76.33718762 | 42.96713946     | 99.22631873  | 96.13513528 |

| 描述性统计    | A     | B     | C        | D               | E     | F      |
|----------|-------|-------|----------|-----------------|-------|--------|
|          | Con   | DOX   | DOX+AP39 | DOX+AP39+siUCP2 | NC    | siUCP2 |
| 值的数目     | 4     | 4     | 4        | 4               | 4     | 4      |
| 最小       | 94.19 | 50.33 | 71.07    | 38.57           | 93.00 | 88.95  |
| 最大值      | 106.3 | 57.15 | 76.34    | 45.33           | 102.1 | 98.71  |
| 范围       | 12.14 | 6.815 | 5.262    | 6.755           | 9.104 | 9.754  |
| 平均:      | mean  | 100.0 | 54.14    | 74.35           | 41.63 | 98.02  |
| 标准偏差     | SD    | 5.101 | 3.009    | 2.349           | 3.093 | 3.804  |
| 标准误差的平均值 |       | 2.551 | 1.505    | 1.174           | 1.546 | 1.902  |

C

| 组 A         | 组 B         | 组 C         | 组 D             | 组 E         | 组 F         |
|-------------|-------------|-------------|-----------------|-------------|-------------|
| Con         | DOX         | DOX+AP39    | DOX+AP39+siUCP2 | NC          | siUCP2      |
| 1.053103350 | 2.475266187 | 2.131254660 | 2.788365683     | 0.957728427 | 1.117859447 |
| 1.105879988 | 2.716991564 | 2.042665304 | 2.975638974     | 0.850625361 | 1.262031817 |
| 1.029395749 | 2.394132578 | 2.100216971 | 2.485905287     | 1.098382354 | 1.053689757 |
| 1.010044316 | 2.359576447 | 2.132930109 | 2.455621550     | 0.954628846 | 1.275309749 |
| 0.801576597 | 2.431034338 | 2.089829188 | 2.686079534     | 0.882626434 | 0.818121654 |

| 描述性统计    | A      | B       | C        | D               | E       | F       |
|----------|--------|---------|----------|-----------------|---------|---------|
|          | Con    | DOX     | DOX+AP39 | DOX+AP39+siUCP2 | NC      | siUCP2  |
| 值的数目     | 5      | 5       | 5        | 5               | 5       | 5       |
| 最小       | 0.8016 | 2.360   | 2.043    | 2.456           | 0.8506  | 0.8181  |
| 最大值      | 1.106  | 2.717   | 2.133    | 2.976           | 1.098   | 1.275   |
| 范围       | 0.3043 | 0.3574  | 0.09026  | 0.5200          | 0.2478  | 0.4572  |
| 平均:      | mean   | 1.000   | 2.475    | 2.099           | 2.678   | 0.9488  |
| 标准偏差     | SD     | 0.1166  | 0.1417   | 0.03691         | 0.2163  | 0.09553 |
| 标准误差的平均值 |        | 0.05214 | 0.06339  | 0.01651         | 0.09674 | 0.04272 |

D

SOD

| 组 A         | 组 B         | 组 C         | 组 D             | 组 E         | 组 F         |
|-------------|-------------|-------------|-----------------|-------------|-------------|
| Con         | DOX         | DOX+AP39    | DOX+AP39+siUCP2 | NC          | siUCP2      |
| 0.009182118 | 0.003919492 | 0.005859623 | 0.003209010     | 0.008941825 | 0.008806531 |
| 0.009071806 | 0.004200491 | 0.005800729 | 0.002847338     | 0.009040840 | 0.008804729 |
| 0.008899938 | 0.003639225 | 0.005843387 | 0.003231389     | 0.008874317 | 0.008796893 |
| 0.008919212 | 0.004177047 | 0.006019057 | 0.003451808     | 0.008972851 | 0.008429640 |

| 描述性统计    | A          | B         | C          | D               | E          | F          |
|----------|------------|-----------|------------|-----------------|------------|------------|
|          | Con        | DOX       | DOX+AP39   | DOX+AP39+siUCP2 | NC         | siUCP2     |
| 值的数目     | 4          | 4         | 4          | 4               | 4          | 4          |
| 最小       | 0.008900   | 0.003639  | 0.005801   | 0.002847        | 0.008874   | 0.008430   |
| 最大值      | 0.009182   | 0.004200  | 0.006019   | 0.003452        | 0.009041   | 0.008807   |
| 范围       | 0.0002822  | 0.0005613 | 0.0002183  | 0.0006045       | 0.0001665  | 0.0003769  |
| 平均: mean | 0.009018   | 0.003984  | 0.005881   | 0.003185        | 0.008957   | 0.008709   |
| 标准偏差 SD  | 0.0001336  | 0.0002628 | 9.552e-005 | 0.0002503       | 6.915e-005 | 0.0001866  |
| 标准误差的平均值 | 6.679e-005 | 0.0001314 | 4.776e-005 | 0.0001251       | 3.458e-005 | 9.329e-005 |

GSH-Px

| 组 A         | 组 B         | 组 C         | 组 D             | 组 E         | 组 F         |
|-------------|-------------|-------------|-----------------|-------------|-------------|
| Con         | DOX         | DOX+AP39    | DOX+AP39+siUCP2 | NC          | siUCP2      |
| 0.304791217 | 0.124577720 | 0.238975700 | 0.097096804     | 0.356804233 | 0.340271890 |
| 0.365692041 | 0.136937441 | 0.224309480 | 0.108996685     | 0.360482954 | 0.343230437 |
| 0.373120039 | 0.132083574 | 0.233769046 | 0.114028162     | 0.363334448 | 0.325858703 |
| 0.365120282 | 0.156238557 | 0.248097077 | 0.109677930     | 0.375947204 | 0.330011861 |

| 描述性统计    | A       | B        | C        | D               | E        | F        |
|----------|---------|----------|----------|-----------------|----------|----------|
|          | Con     | DOX      | DOX+AP39 | DOX+AP39+siUCP2 | NC       | siUCP2   |
| 值的数目     | 4       | 4        | 4        | 4               | 4        | 4        |
| 最小       | 0.3048  | 0.1246   | 0.2243   | 0.09710         | 0.3568   | 0.3259   |
| 最大值      | 0.3731  | 0.1562   | 0.2481   | 0.1140          | 0.3759   | 0.3432   |
| 范围       | 0.06833 | 0.03166  | 0.02379  | 0.01693         | 0.01914  | 0.01737  |
| 平均: mean | 0.3522  | 0.1375   | 0.2363   | 0.1074          | 0.3641   | 0.3348   |
| 标准偏差 SD  | 0.03180 | 0.01351  | 0.009942 | 0.007253        | 0.008312 | 0.008244 |
| 标准误差的平均值 | 0.01590 | 0.006756 | 0.004971 | 0.003626        | 0.004156 | 0.004122 |

MDA

| 组 A         | 组 B         | 组 C         | 组 D             | 组 E         | 组 F         |
|-------------|-------------|-------------|-----------------|-------------|-------------|
| Con         | DOX         | DOX+AP39    | DOX+AP39+siUCP2 | NC          | siUCP2      |
| 0.004274026 | 0.007750595 | 0.006432313 | 0.007636587     | 0.004601467 | 0.004449500 |
| 0.004099678 | 0.007515079 | 0.006238529 | 0.007793675     | 0.004085243 | 0.004538954 |
| 0.004584150 | 0.006945217 | 0.005693452 | 0.007839690     | 0.004403981 | 0.004286702 |
| 0.003899013 | 0.007020243 | 0.006033445 | 0.008467133     | 0.003730343 | 0.004392526 |

| 描述性统计    | A         | B         | C         | D               | E         | F          |
|----------|-----------|-----------|-----------|-----------------|-----------|------------|
|          | Con       | DOX       | DOX+AP39  | DOX+AP39+siUCP2 | NC        | siUCP2     |
| 值的数目     | 4         | 4         | 4         | 4               | 4         | 4          |
| 最小       | 0.003899  | 0.006945  | 0.005693  | 0.007637        | 0.003730  | 0.004287   |
| 最大值      | 0.004584  | 0.007751  | 0.006432  | 0.008467        | 0.004601  | 0.004539   |
| 范围       | 0.0006851 | 0.0008054 | 0.0007389 | 0.0008305       | 0.0008711 | 0.0002523  |
| 平均: mean | 0.004214  | 0.007308  | 0.006099  | 0.007934        | 0.004205  | 0.004417   |
| 标准偏差 SD  | 0.0002903 | 0.0003887 | 0.0003159 | 0.0003657       | 0.0003814 | 0.0001057  |
| 标准误差的平均值 | 0.0001452 | 0.0001943 | 0.0001579 | 0.0001829       | 0.0001907 | 5.284e-005 |

NADPH

| 组 A          | 组 B         | 组 C         | 组 D             | 组 E         | 组 F         |
|--------------|-------------|-------------|-----------------|-------------|-------------|
| Con          | DOX         | DOX+AP39    | DOX+AP39+siUCP2 | NC          | siUCP2      |
| 0.0004252315 | 0.002654794 | 0.001843023 | 0.002594366     | 0.000435122 | 0.000482245 |
| 0.0004595194 | 0.002652651 | 0.001815800 | 0.002745813     | 0.000486695 | 0.000485400 |
| 0.0004343922 | 0.002729493 | 0.001742279 | 0.002740161     | 0.000484152 | 0.000541966 |
| 0.0004456252 | 0.002494917 | 0.001819968 | 0.002767148     | 0.000466561 | 0.000546228 |

| 描述性统计    | A          | B          | C          | D               | E          | F          |
|----------|------------|------------|------------|-----------------|------------|------------|
|          | Con        | DOX        | DOX+AP39   | DOX+AP39+siUCP2 | NC         | siUCP2     |
| 值的数目     | 4          | 4          | 4          | 4               | 4          | 4          |
| 最小       | 0.0004252  | 0.002495   | 0.001742   | 0.002594        | 0.0004351  | 0.0004822  |
| 最大值      | 0.0004595  | 0.002729   | 0.001843   | 0.002767        | 0.0004867  | 0.0005462  |
| 范围       | 3.429e-005 | 0.0002346  | 0.0001007  | 0.0001728       | 5.157e-005 | 6.398e-005 |
| 平均: mean | 0.0004412  | 0.002633   | 0.001805   | 0.002712        | 0.0004681  | 0.0005140  |
| 标准偏差 SD  | 1.479e-005 | 9.872e-005 | 4.367e-005 | 7.919e-005      | 2.376e-005 | 3.487e-005 |
| 标准误差的平均值 | 7.397e-006 | 4.936e-005 | 2.183e-005 | 3.960e-005      | 1.188e-005 | 1.743e-005 |

E

| 组 A  | 组 B   | 组 C      | 组 D             | 组 E  | 组 F    |
|------|-------|----------|-----------------|------|--------|
| Con  | DOX   | DOX+AP39 | DOX+AP39+siUCP2 | NC   | siUCP2 |
| 4.56 | 33.03 | 20.31    | 33.07           | 4.57 | 4.64   |
| 4.87 | 32.52 | 20.68    | 33.54           | 4.79 | 4.67   |
| 5.10 | 28.92 | 20.83    | 33.95           | 5.09 | 5.18   |

| 描述性统计    | A      | B     | C        | D               | E      | F      |
|----------|--------|-------|----------|-----------------|--------|--------|
|          | Con    | DOX   | DOX+AP39 | DOX+AP39+siUCP2 | NC     | siUCP2 |
| 值的数目     | 3      | 3     | 3        | 3               | 3      | 3      |
| 最小       | 4.560  | 28.92 | 20.31    | 33.07           | 4.570  | 4.640  |
| 最大值      | 5.100  | 33.03 | 20.83    | 33.95           | 5.090  | 5.180  |
| 范围       | 0.5400 | 4.110 | 0.5200   | 0.8800          | 0.5200 | 0.5400 |
| 平均: mean | 4.843  | 31.49 | 20.61    | 33.52           | 4.817  | 4.830  |
| 标准偏差 SD  | 0.2710 | 2.240 | 0.2676   | 0.4403          | 0.2610 | 0.3035 |
| 标准误差的平均值 | 0.1565 | 1.293 | 0.1545   | 0.2542          | 0.1507 | 0.1752 |

F

| 组 A | 组 B | 组 C      | 组 D             | 组 E | 组 F    |
|-----|-----|----------|-----------------|-----|--------|
| Con | DOX | DOX+AP39 | DOX+AP39+siUCP2 | NC  | siUCP2 |
| 6   | 29  | 15       | 25              | 8   | 4      |
| 5   | 28  | 18       | 29              | 8   | 7      |
| 5   | 30  | 20       | 30              | 4   | 4      |

| 描述性统计    | A      | B      | C        | D               | E     | F      |
|----------|--------|--------|----------|-----------------|-------|--------|
|          | Con    | DOX    | DOX+AP39 | DOX+AP39+siUCP2 | NC    | siUCP2 |
| 值的数目     | 3      | 3      | 3        | 3               | 3     | 3      |
| 最小       | 5.000  | 28.00  | 15.00    | 25.00           | 4.000 | 4.000  |
| 最大值      | 6.000  | 30.00  | 20.00    | 30.00           | 8.000 | 7.000  |
| 范围       | 1.000  | 2.000  | 5.000    | 5.000           | 4.000 | 3.000  |
| 平均: mean | 5.333  | 29.00  | 17.67    | 28.00           | 6.667 | 5.000  |
| 标准偏差 SD  | 0.5774 | 1.000  | 2.517    | 2.646           | 2.309 | 1.732  |
| 标准误差的平均值 | 0.3333 | 0.5774 | 1.453    | 1.528           | 1.333 | 1.000  |



## G

### Bax

| 组 A         | 组 B         | 组 C         | 组 D             | 组 E         | 组 F         |
|-------------|-------------|-------------|-----------------|-------------|-------------|
| Con         | DOX         | DOX+AP39    | DOX+AP39+siUCP2 | NC          | siUCP2      |
| 1.142556626 | 1.742697100 | 1.346991602 | 1.571641602     | 0.963802528 | 1.039686938 |
| 0.998608937 | 1.375682172 | 1.224971256 | 1.665825742     | 1.158940145 | 1.325418393 |
| 1.041953438 | 1.761882209 | 1.451549388 | 1.904063452     | 1.354120343 | 1.390311822 |
| 0.816880999 | 1.668585640 | 1.363150822 | 1.837235679     | 0.868051009 | 1.054981969 |

| 描述性统计    | A       | B       | C        | D               | E      | F       |
|----------|---------|---------|----------|-----------------|--------|---------|
|          | Con     | DOX     | DOX+AP39 | DOX+AP39+siUCP2 | NC     | siUCP2  |
| 值的数目     | 4       | 4       | 4        | 4               | 4      | 4       |
| 最小       | 0.8169  | 1.376   | 1.225    | 1.572           | 0.8681 | 1.040   |
| 最大值      | 1.143   | 1.762   | 1.452    | 1.904           | 1.354  | 1.390   |
| 范围       | 0.3257  | 0.3862  | 0.2266   | 0.3324          | 0.4861 | 0.3506  |
| 平均: mean | 1.000   | 1.637   | 1.347    | 1.745           | 1.086  | 1.203   |
| 标准偏差 SD  | 0.1362  | 0.1789  | 0.09324  | 0.1529          | 0.2157 | 0.1813  |
| 标准误差的平均值 | 0.06808 | 0.08947 | 0.04662  | 0.07645         | 0.1079 | 0.09067 |

### Bcl-2

| 组 A         | 组 B         | 组 C         | 组 D             | 组 E         | 组 F         |
|-------------|-------------|-------------|-----------------|-------------|-------------|
| Con         | DOX         | DOX+AP39    | DOX+AP39+siUCP2 | NC          | siUCP2      |
| 0.923749415 | 0.551540216 | 0.753774549 | 0.245759728     | 1.017979715 | 0.879956904 |
| 0.965688010 | 0.484229149 | 0.779466145 | 0.167541085     | 0.955079917 | 1.089986215 |
| 1.110562575 | 0.561698050 | 0.927867628 | 0.263273566     | 1.013248309 | 1.049928124 |

| 描述性统计    | A       | B       | C        | D               | E       | F       |
|----------|---------|---------|----------|-----------------|---------|---------|
|          | Con     | DOX     | DOX+AP39 | DOX+AP39+siUCP2 | NC      | siUCP2  |
| 值的数目     | 3       | 3       | 3        | 3               | 3       | 3       |
| 最小       | 0.9237  | 0.4842  | 0.7538   | 0.1675          | 0.9551  | 0.8800  |
| 最大值      | 1.111   | 0.5617  | 0.9279   | 0.2633          | 1.018   | 1.090   |
| 范围       | 0.1868  | 0.07747 | 0.1741   | 0.09573         | 0.06290 | 0.2100  |
| 平均: mean | 1.000   | 0.5325  | 0.8204   | 0.2255          | 0.9954  | 1.007   |
| 标准偏差 SD  | 0.09802 | 0.04210 | 0.09398  | 0.05097         | 0.03503 | 0.1115  |
| 标准误差的平均值 | 0.05659 | 0.02431 | 0.05426  | 0.02943         | 0.02022 | 0.06438 |

### Cleaved Caspase3/Caspase3

| 组 A         | 组 B         | 组 C         | 组 D             | 组 E         | 组 F         |
|-------------|-------------|-------------|-----------------|-------------|-------------|
| Con         | DOX         | DOX+AP39    | DOX+AP39+siUCP2 | NC          | siUCP2      |
| 0.732526141 | 7.882589206 | 3.164710181 | 10.49670954     | 1.239472377 | 1.165335397 |
| 1.076754374 | 7.423757670 | 4.910581257 | 11.49711074     | 1.121588306 | 1.600547314 |
| 1.190719485 | 3.098588350 | 3.630494050 | 10.39680251     | 1.486499545 | 1.751834506 |

| 描述性统计    | A      | B      | C        | D               | E      | F      |
|----------|--------|--------|----------|-----------------|--------|--------|
|          | Con    | DOX    | DOX+AP39 | DOX+AP39+siUCP2 | NC     | siUCP2 |
| 值的数目     | 3      | 3      | 3        | 3               | 3      | 3      |
| 最小       | 0.7325 | 6.099  | 3.630    | 10.40           | 1.122  | 1.165  |
| 最大值      | 1.191  | 7.883  | 6.165    | 11.50           | 1.486  | 1.752  |
| 范围       | 0.4582 | 1.784  | 2.534    | 1.100           | 0.3649 | 0.5865 |
| 平均: mean | 1.000  | 7.135  | 4.902    | 10.80           | 1.283  | 1.506  |
| 标准偏差 SD  | 0.2385 | 0.9264 | 1.267    | 0.6085          | 0.1862 | 0.3045 |
| 标准误差的平均值 | 0.1377 | 0.5349 | 0.7316   | 0.3513          | 0.1075 | 0.1758 |

## H

| 组 A         | 组 B         | 组 C         | 组 D             | 组 E         | 组 F         |
|-------------|-------------|-------------|-----------------|-------------|-------------|
| Con         | DOX         | DOX+AP39    | DOX+AP39+siUCP2 | NC          | siUCP2      |
| 0.163614496 | 7.851646172 | 2.709296882 | 10.045497630    | 0.133020736 | 0.143550131 |
| 0.145316361 | 7.117533719 | 2.772682490 | 9.152889076     | 0.085930123 | 0.110643119 |
| 0.157014157 | 3.869391635 | 2.586979167 | 10.462821730    | 0.181902849 | 0.119155824 |
| 0.160803791 | 7.445937018 | 2.523288217 | 8.242680657     | 0.163084792 | 0.140834594 |

| 描述性统计    | A        | B      | C        | D               | E       | F        |
|----------|----------|--------|----------|-----------------|---------|----------|
|          | Con      | DOX    | DOX+AP39 | DOX+AP39+siUCP2 | NC      | siUCP2   |
| 值的数目     | 4        | 4      | 4        | 4               | 4       | 4        |
| 最小       | 0.1453   | 6.869  | 2.523    | 8.243           | 0.08593 | 0.1106   |
| 最大值      | 0.1636   | 7.852  | 2.773    | 10.46           | 0.1819  | 0.1436   |
| 范围       | 0.01830  | 0.9823 | 0.2494   | 2.220           | 0.09597 | 0.03291  |
| 平均: mean | 0.1567   | 7.321  | 2.648    | 9.476           | 0.1410  | 0.1285   |
| 标准偏差 SD  | 0.008049 | 0.4253 | 0.1134   | 0.9872          | 0.04186 | 0.01617  |
| 标准误差的平均值 | 0.004024 | 0.2126 | 0.05670  | 0.4936          | 0.02093 | 0.008087 |

## I

| 组 A         | 组 B         | 组 C          | 组 D             | 组 E         | 组 F          |
|-------------|-------------|--------------|-----------------|-------------|--------------|
| Con         | DOX         | DOX+AP39     | DOX+AP39+siUCP2 | NC          | siUCP2       |
| 179.1160654 | 53.11235818 | 97.63633158  | 48.93649879     | 174.0102090 | 173.77733040 |
| 182.0826157 | 57.48994588 | 95.19142253  | 51.14385417     | 177.4412945 | 170.36681470 |
| 176.2272106 | 30.88880463 | 100.39241090 | 52.36523034     | 179.9499597 | 184.01146870 |
| 175.3372455 | 56.64764581 | 102.78397650 | 47.82467587     | 182.0981804 | 174.76266830 |

| 描述性统计    | A     | B     | C        | D               | E     | F      |
|----------|-------|-------|----------|-----------------|-------|--------|
|          | Con   | DOX   | DOX+AP39 | DOX+AP39+siUCP2 | NC    | siUCP2 |
| 值的数目     | 4     | 4     | 4        | 4               | 4     | 4      |
| 最小       | 175.3 | 53.11 | 95.19    | 47.82           | 174.0 | 170.4  |
| 最大值      | 182.1 | 60.89 | 102.8    | 52.37           | 182.1 | 184.0  |
| 范围       | 6.745 | 7.776 | 7.593    | 4.541           | 8.088 | 13.64  |
| 平均: mean | 178.2 | 57.03 | 99.00    | 50.07           | 178.4 | 175.7  |
| 标准偏差 SD  | 3.055 | 3.194 | 3.298    | 2.061           | 3.477 | 5.834  |
| 标准误差的平均值 | 1.528 | 1.597 | 1.649    | 1.031           | 1.738 | 2.917  |

## J

| 组 A         | 组 B         | 组 C         | 组 D             | 组 E         | 组 F         |
|-------------|-------------|-------------|-----------------|-------------|-------------|
| Con         | DOX         | DOX+AP39    | DOX+AP39+siUCP2 | NC          | siUCP2      |
| 0.770179746 | 0.211503904 | 0.469797834 | 0.364169292     | 0.786771523 | 0.885708867 |
| 1.081631080 | 0.180444043 | 0.441329971 | 0.393515138     | 1.028296017 | 1.023598721 |
| 1.148189175 | 0.319857334 | 0.515548457 | 0.614892551     | 1.030056732 | 0.969139273 |

| 描述性统计    | A      | B       | C        | D               | E       | F       |
|----------|--------|---------|----------|-----------------|---------|---------|
|          | Con    | DOX     | DOX+AP39 | DOX+AP39+siUCP2 | NC      | siUCP2  |
| 值的数目     | 3      | 3       | 3        | 3               | 3       | 3       |
| 最小       | 0.7702 | 0.1804  | 0.4413   | 0.3642          | 0.7868  | 0.8857  |
| 最大值      | 1.148  | 0.3199  | 0.5155   | 0.6149          | 1.030   | 1.024   |
| 范围       | 0.3780 | 0.1394  | 0.07422  | 0.2507          | 0.2433  | 0.1379  |
| 平均: mean | 1.000  | 0.2373  | 0.4756   | 0.4575          | 0.9484  | 0.9595  |
| 标准偏差 SD  | 0.2018 | 0.07319 | 0.03744  | 0.1371          | 0.1400  | 0.06945 |
| 标准误差的平均值 | 0.1165 | 0.04226 | 0.02162  | 0.07914         | 0.08080 | 0.04010 |



Fig 7

A

| 组 A<br>Con |        |        |        |        |        |        |        |        |        |  |
|------------|--------|--------|--------|--------|--------|--------|--------|--------|--------|--|
| A:Y1       | A:Y2   | A:Y3   | A:Y4   | A:Y5   | A:Y6   | A:Y7   | A:Y8   | A:Y9   | A:Y10  |  |
| 306.30     | 316.80 | 308.30 | 302.30 | 313.10 | 316.30 | 318.10 | 316.80 | 315.20 | 306.70 |  |
| 325.90     | 333.10 | 319.60 | 315.30 | 320.50 | 345.10 | 345.20 | 347.20 | 326.50 | 311.90 |  |
| 340.70     | 352.10 | 332.80 | 342.40 | 330.10 | 351.30 | 363.00 | 370.10 | 340.60 | 329.80 |  |
| 345.80     | 356.80 | 356.20 | 350.40 | 348.80 | 368.60 | 380.90 | 382.30 | 349.60 | 339.50 |  |
| 362.30     | 359.40 | 370.60 | 372.60 | 362.30 | 388.30 | 396.70 | 405.10 | 358.80 | 356.00 |  |
| 384.20     | 381.40 | 375.90 | 384.20 | 374.20 | 397.70 | 414.30 | 424.80 | 380.90 | 366.70 |  |
| 390.60     | 370.20 | 387.10 | 380.10 | 387.40 | 420.90 | 426.60 | 422.60 | 384.20 | 368.40 |  |
| 402.80     | 383.20 | 395.20 | 402.30 | 401.90 | 431.50 | 445.40 | 412.30 | 378.50 | 396.30 |  |

| 组 B<br>DOX |       |       |       |       |       |       |       |       |       |  |
|------------|-------|-------|-------|-------|-------|-------|-------|-------|-------|--|
| B:Y1       | B:Y2  | B:Y3  | B:Y4  | B:Y5  | B:Y6  | B:Y7  | B:Y8  | B:Y9  | B:Y10 |  |
| 307.9      | 312.4 | 312.2 | 310.2 | 303.6 | 314.4 | 317.2 | 319.7 | 300.7 | 312.9 |  |
| 301.2      | 308.9 | 313.6 | 308.1 | 288.5 | 307.6 | 315.7 | 310.0 | 298.2 | 313.7 |  |
| 290.5      | 303.5 | 317.2 | 304.8 | 272.5 | 305.5 | 311.4 | 302.8 | 292.5 | 314.5 |  |
| 279.6      | 289.4 | 295.6 | 286.8 | 270.3 | 293.5 | 295.8 | 300.9 | 276.7 | 310.3 |  |
| 260.5      | 274.3 | 279.3 | 270.4 | 269.1 | 277.4 | 270.6 | 297.1 | 270.3 | 309.8 |  |
| 266.4      | 270.5 | 262.3 | 266.6 | 250.5 | 251.2 | 264.6 | 289.3 | 261.5 | 308.7 |  |
| 251.8      | 248.6 | 234.9 | 240.4 | 227.9 | 232.8 | 236.5 | 255.3 | 244.5 | 260.2 |  |
| 245.2      | 216.7 | 205.9 | 196.7 | 199.2 | 195.1 | 201.9 | 219.1 | 218.5 | 223.5 |  |

| 组 C<br>AP39 |       |       |       |       |       |       |       |       |       |
|-------------|-------|-------|-------|-------|-------|-------|-------|-------|-------|
| C:Y1        | C:Y2  | C:Y3  | C:Y4  | C:Y5  | C:Y6  | C:Y7  | C:Y8  | C:Y9  | C:Y10 |
| 313.6       | 313.9 | 313.9 | 316.4 | 317.3 | 308.9 | 325.7 | 303.2 | 307.5 | 315.3 |
| 325.9       | 357.2 | 330.6 | 338.5 | 335.9 | 322.5 | 345.4 | 342.0 | 333.5 | 329.5 |
| 350.5       | 379.3 | 356.4 | 342.7 | 345.4 | 334.5 | 370.3 | 366.7 | 346.9 | 345.6 |
| 352.8       | 382.5 | 368.2 | 360.9 | 348.4 | 340.1 | 378.3 | 368.9 | 352.8 | 358.2 |
| 360.3       | 400.1 | 396.6 | 385.4 | 359.7 | 355.9 | 400.2 | 370.3 | 360.7 | 371.6 |
| 367.8       | 406.9 | 406.5 | 396.1 | 365.2 | 376.4 | 409.7 | 375.2 | 365.3 | 395.3 |
| 369.2       | 411.9 | 409.7 | 404.1 | 389.2 | 382.6 | 416.8 | 391.5 | 377.9 | 405.6 |
| 361.4       | 428.7 | 418.9 | 406.8 | 380.8 | 394.3 | 430.5 | 402.6 | 395.4 | 403.5 |

| 组 D<br>DOX+AP39 |       |       |       |       |       |       |       |       |  |
|-----------------|-------|-------|-------|-------|-------|-------|-------|-------|--|
| D:Y2            | D:Y3  | D:Y4  | D:Y5  | D:Y6  | D:Y7  | D:Y8  | D:Y9  | D:Y10 |  |
| 317.4           | 314.3 | 308.6 | 303.3 | 314.6 | 305.3 | 315.2 | 318.5 | 305.4 |  |
| 310.6           | 316.9 | 300.2 | 289.0 | 300.7 | 298.4 | 296.8 | 301.5 | 313.9 |  |
| 296.5           | 296.5 | 296.6 | 262.6 | 277.4 | 273.4 | 279.8 | 294.6 | 324.0 |  |
| 290.7           | 295.7 | 274.3 | 265.4 | 280.2 | 282.3 | 259.4 | 295.7 | 328.8 |  |
| 275.9           | 285.6 | 256.5 | 268.3 | 275.3 | 275.0 | 247.9 | 289.1 | 338.9 |  |
| 265.3           | 278.7 | 246.4 | 270.2 | 268.3 | 273.5 | 242.3 | 283.2 | 335.2 |  |
| 254.8           | 279.9 | 240.7 | 266.8 | 266.0 | 271.6 | 238.0 | 270.2 | 302.6 |  |
| 241.5           | 279.5 | 236.2 | 258.3 | 265.2 | 269.5 | 230.9 | 266.3 | 295.4 |  |

| 组 E<br>DOX+AP39+CC |       |       |       |       |       |       |       |       |       |  |
|--------------------|-------|-------|-------|-------|-------|-------|-------|-------|-------|--|
| E:Y1               | E:Y2  | E:Y3  | E:Y4  | E:Y5  | E:Y6  | E:Y7  | E:Y8  | E:Y9  | E:Y10 |  |
| 300.2              | 313.7 | 302.4 | 302.2 | 317.6 | 311.9 | 310.3 | 300.7 | 305.8 | 309.5 |  |
| 295.2              | 307.0 | 292.5 | 301.6 | 284.3 | 303.8 | 295.7 | 294.9 | 302.6 | 300.5 |  |
| 285.3              | 290.2 | 288.5 | 292.4 | 270.5 | 298.1 | 272.3 | 290.7 | 285.6 | 294.8 |  |
| 270.4              | 278.2 | 280.9 | 277.3 | 258.3 | 292.0 | 270.9 | 283.2 | 277.5 | 274.3 |  |
| 263.5              | 270.5 | 263.7 | 259.1 | 240.9 | 283.5 | 263.3 | 275.6 | 260.6 | 270.2 |  |
| 260.3              | 265.2 | 258.9 | 240.5 | 246.8 | 277.2 | 257.4 | 269.3 | 252.9 | 268.5 |  |
| 238.3              | 244.0 | 227.6 | 228.5 | 239.3 | 241.3 | 251.5 | 237.5 | 229.7 | 246.9 |  |
| 225.3              | 236.5 | 207.6 | 219.5 | 228.4 | 219.6 | 231.5 | 229.7 | 205.3 | 231.4 |  |

| 组 F<br>DOX+AP39+Genipin |       |       |       |       |       |       |       |       |       |  |
|-------------------------|-------|-------|-------|-------|-------|-------|-------|-------|-------|--|
| F:Y1                    | F:Y2  | F:Y3  | F:Y4  | F:Y5  | F:Y6  | F:Y7  | F:Y8  | F:Y9  | F:Y10 |  |
| 310.7                   | 299.9 | 310.5 | 302.4 | 310.3 | 314.5 | 315.6 | 311.3 | 306.2 | 308.1 |  |
| 290.1                   | 289.3 | 308.4 | 278.5 | 288.2 | 310.6 | 295.4 | 305.6 | 274.3 | 284.9 |  |
| 273.2                   | 265.7 | 291.5 | 267.3 | 256.9 | 305.2 | 288.4 | 298.5 | 259.4 | 270.3 |  |
| 265.5                   | 260.2 | 277.3 | 254.1 | 262.3 | 283.5 | 280.5 | 283.6 | 251.6 | 265.3 |  |
| 241.8                   | 241.9 | 256.1 | 240.5 | 260.2 | 267.2 | 269.7 | 264.8 | 239.8 | 233.6 |  |
| 245.3                   | 232.9 | 242.5 | 230.2 | 258.7 | 260.8 | 281.7 | 256.3 | 232.5 | 223.9 |  |
| 240.2                   | 225.5 | 239.0 | 218.7 | 236.6 | 255.8 | 260.3 | 250.5 | 212.6 | 219.7 |  |
| 234.3                   | 208.2 | 235.6 | 195.5 | 202.7 | 246.7 | 258.4 | 249.2 | 201.5 | 215.8 |  |

| 描述性统计    | A          | B     | C     | D        | E           | F                |
|----------|------------|-------|-------|----------|-------------|------------------|
|          | Con        | DOX   | AP39  | DOX+AP39 | DOX+AP39+CC | DOX+AP39+Genipin |
| 值的数目     | 8          | 8     | 8     | 8        | 8           | 8                |
| 最小       | 312.0      | 212.2 | 313.6 | 262.1    | 223.5       | 224.8            |
| 最大值      | 404.9      | 311.1 | 402.4 | 311.6    | 307.4       | 309.0            |
| 范围       | 92.95      | 98.94 | 88.82 | 49.49    | 83.95       | 84.16            |
| 平均:      | mean 362.4 | 276.5 | 365.7 | 285.2    | 269.4       | 263.0            |
| 标准偏差     | SD 32.30   | 34.20 | 30.59 | 17.17    | 28.74       | 29.02            |
| 标准误差的平均值 | 11.42      | 12.09 | 10.81 | 6.069    | 10.16       | 10.26            |

B

| 组 A         | 组 B         | 组 C         | 组 D         | 组 E         | 组 F              |
|-------------|-------------|-------------|-------------|-------------|------------------|
| Con         | DOX         | AP39        | DOX+AP39    | DOX+AP39+CC | DOX+AP39+Genipin |
| 2.703574975 | 3.087275693 | 2.772551190 | 2.715517241 | 2.671992898 | 2.552283397      |
| 2.479123173 | 2.967235810 | 2.327205027 | 2.770186335 | 2.676532770 | 2.992315082      |
| 2.532894737 | 3.035454104 | 2.814514204 | 2.787119857 | 2.803468208 | 2.538200340      |
| 2.450907283 | 2.928317234 | 2.598328417 | 2.485182049 | 3.056947608 | 3.539641944      |
| 2.659865638 | 3.132530120 | 2.623424370 | 2.768099110 | 3.021015762 | 3.221509620      |
| 2.699884125 | 2.895950794 | 2.754248034 | 2.462292609 | 2.937158470 | 2.752330766      |
| 2.649303996 | 3.224368499 | 2.427409988 | 2.534322820 | 3.084233261 | 2.608359133      |
| 2.512733447 | 2.907348243 | 2.550919026 | 2.823733218 | 2.973443622 | 2.917335474      |
| 2.570673712 | 2.764302059 | 2.551846232 | 2.944048066 | 2.932294204 | 3.359801489      |
| 2.644461267 | 3.033557047 | 2.636926890 | 2.802979012 | 2.908383751 | 3.262279889      |

| 描述性统计    | A          | B       | C       | D        | E           | F                |
|----------|------------|---------|---------|----------|-------------|------------------|
|          | Con        | DOX     | AP39    | DOX+AP39 | DOX+AP39+CC | DOX+AP39+Genipin |
| 值的数目     | 10         | 10      | 10      | 10       | 10          | 10               |
| 最小       | 2.451      | 2.764   | 2.327   | 2.462    | 2.672       | 2.538            |
| 最大值      | 2.704      | 3.224   | 2.815   | 2.944    | 3.084       | 3.540            |
| 范围       | 0.2527     | 0.4601  | 0.4873  | 0.4818   | 0.4122      | 1.001            |
| 平均:      | mean 2.590 | 2.998   | 2.606   | 2.709    | 2.907       | 2.974            |
| 标准偏差     | SD 0.09285 | 0.1329  | 0.1528  | 0.1606   | 0.1460      | 0.3601           |
| 标准误差的平均值 | 0.02936    | 0.04204 | 0.04832 | 0.05078  | 0.04618     | 0.1139           |

C

EF

| 组 A   | 组 B   | 组 C   | 组 D      | 组 E         | 组 F              |
|-------|-------|-------|----------|-------------|------------------|
| Con   | DOX   | AP39  | DOX+AP39 | DOX+AP39+CC | DOX+AP39+Genipin |
| 95.55 | 75.57 | 95.96 | 83.05    | 70.54       | 72.75            |
| 94.35 | 73.59 | 94.58 | 84.35    | 72.08       | 72.11            |
| 93.55 | 74.22 | 95.39 | 84.35    | 74.78       | 73.98            |
| 95.28 | 78.61 | 94.14 | 83.92    | 74.78       | 69.58            |
| 96.90 | 74.76 | 95.81 | 82.15    | 85.82       | 73.85            |
| 94.35 | 79.52 | 95.96 | 86.06    | 80.93       | 72.95            |
| 94.49 | 73.68 | 93.50 | 85.12    | 71.17       | 73.07            |

| 描述性统计    | A          | B      | C      | D        | E           | F                |
|----------|------------|--------|--------|----------|-------------|------------------|
|          | Con        | DOX    | AP39   | DOX+AP39 | DOX+AP39+CC | DOX+AP39+Genipin |
| 值的数目     | 7          | 7      | 7      | 7        | 7           | 7                |
| 最小       | 93.55      | 73.59  | 93.50  | 82.15    | 70.54       | 69.58            |
| 最大值      | 96.90      | 79.52  | 95.96  | 86.06    | 85.82       | 73.98            |
| 范围       | 3.350      | 5.930  | 2.460  | 3.910    | 15.28       | 4.400            |
| 平均:      | mean 94.92 | 75.71  | 95.05  | 84.14    | 75.73       | 72.61            |
| 标准偏差     | SD 1.092   | 2.404  | 0.9833 | 1.287    | 5.653       | 1.483            |
| 标准误差的平均值 | 0.4128     | 0.9087 | 0.3716 | 0.4863   | 2.136       | 0.5604           |

## FS

| 组 A   | 组 B   | 组 C   | 组 D      | 组 E         | 组 F              |
|-------|-------|-------|----------|-------------|------------------|
| Con   | DOX   | AP39  | DOX+AP39 | DOX+AP39+CC | DOX+AP39+Genipin |
| 66.34 | 39.08 | 67.57 | 46.60    | 35.24       | 36.84            |
| 63.55 | 37.62 | 63.92 | 48.08    | 36.36       | 36.26            |
| 61.95 | 37.93 | 66.06 | 48.11    | 38.54       | 37.78            |
| 65.71 | 41.67 | 63.25 | 47.57    | 38.46       | 34.38            |
| 70.43 | 38.37 | 67.00 | 45.63    | 49.32       | 37.86            |
| 63.55 | 42.47 | 67.57 | 50.00    | 44.44       | 36.96            |
| 63.89 | 37.50 | 61.62 | 49.11    | 35.90       | 37.39            |

| 描述性统计    | A          | B      | C      | D        | E           | F                |
|----------|------------|--------|--------|----------|-------------|------------------|
|          | Con        | DOX    | AP39   | DOX+AP39 | DOX+AP39+CC | DOX+AP39+Genipin |
| 值的数目     | 7          | 7      | 7      | 7        | 7           | 7                |
| 最小       | 61.95      | 37.50  | 61.62  | 45.63    | 35.24       | 34.38            |
| 最大值      | 70.43      | 42.47  | 67.57  | 50.00    | 49.32       | 37.86            |
| 范围       | 8.480      | 4.970  | 5.950  | 4.370    | 14.08       | 3.480            |
| 平均:      | mean 65.06 | 39.23  | 65.28  | 47.87    | 39.75       | 36.78            |
| 标准偏差     | SD 2.784   | 2.020  | 2.360  | 1.466    | 5.218       | 1.198            |
| 标准误差的平均值 | 1.052      | 0.7636 | 0.8920 | 0.5541   | 1.972       | 0.4526           |

## E/A

| 组 A  | 组 B  | 组 C  | 组 D      | 组 E         | 组 F              |
|------|------|------|----------|-------------|------------------|
| Con  | DOX  | AP39 | DOX+AP39 | DOX+AP39+CC | DOX+AP39+Genipin |
| 1.76 | 0.71 | 1.31 | 1.42     | 0.58        | 0.63             |
| 1.41 | 0.56 | 2.14 | 1.93     | 0.66        | 1.27             |
| 1.52 | 0.61 | 1.51 | 1.30     | 1.47        | 0.71             |
| 1.88 | 0.38 | 1.63 | 1.52     | 1.43        | 0.43             |
| 1.43 | 0.58 | 1.55 | 1.74     | 0.67        | 0.43             |
| 2.12 | 0.57 | 1.63 | 1.38     | 0.55        | 1.33             |
| 1.41 | 0.61 | 1.45 | 1.56     | 0.64        | 0.54             |

| 描述性统计    | A          | B       | C       | D        | E           | F                |
|----------|------------|---------|---------|----------|-------------|------------------|
|          | Con        | DOX     | AP39    | DOX+AP39 | DOX+AP39+CC | DOX+AP39+Genipin |
| 值的数目     | 7          | 7       | 7       | 7        | 7           | 7                |
| 最小       | 1.410      | 0.3800  | 1.310   | 1.300    | 0.5500      | 0.4300           |
| 最大值      | 2.120      | 0.7100  | 2.140   | 1.930    | 1.470       | 1.330            |
| 范围       | 0.7100     | 0.3300  | 0.8300  | 0.6300   | 0.9200      | 0.9000           |
| 平均:      | mean 1.647 | 0.5743  | 1.603   | 1.550    | 0.8571      | 0.7629           |
| 标准偏差     | SD 0.2788  | 0.09914 | 0.2616  | 0.2198   | 0.4074      | 0.3809           |
| 标准误差的平均值 | 0.1054     | 0.03747 | 0.09887 | 0.08307  | 0.1540      | 0.1440           |

## D

### CK-MB

| 组 A          | 组 B         | 组 C         | 组 D         | 组 E         | 组 F              |
|--------------|-------------|-------------|-------------|-------------|------------------|
| Con          | DOX         | AP39        | DOX+AP39    | DOX+AP39+CC | DOX+AP39+Genipin |
| 124.74319530 | 152.4686391 | 111.7088757 | 142.6295858 | 263.8635503 | 267.7810651      |
| 149.37633140 | 288.6946746 | 127.3349112 | 166.9976331 | 275.6771598 | 233.3899408      |
| 119.82248520 | 241.1786982 | 117.6272189 | 159.6449704 | 239.6021302 | 209.1466272      |
| 133.60710060 | 220.0863905 | 158.2402367 | 168.6248521 | 251.1885207 | 245.1615385      |
| 129.71242600 | 197.0390533 | 131.5609467 | 164.6272189 | 202.8727811 | 221.3852071      |
| 99.39585799  | 286.8828402 | 100.0757396 | 167.5692308 | 263.8301775 | 257.0105325      |
| 120.69301780 | 274.6201183 | 143.7656805 | 176.0828402 | 228.2756213 | 196.8886391      |
| 112.92887570 | 229.9349112 | 114.4816568 | 165.9029586 | 238.8539645 | 244.7691124      |
| 152.78343200 | 248.3029586 | 129.0863905 | 169.5822485 | 287.3235503 | 209.3942012      |
| 133.89940830 | 237.7846154 | 154.3988166 | 167.5230769 | 216.4120710 | 221.0578698      |

| 描述性统计    | A          | B     | C     | D        | E           | F                |
|----------|------------|-------|-------|----------|-------------|------------------|
|          | Con        | DOX   | AP39  | DOX+AP39 | DOX+AP39+CC | DOX+AP39+Genipin |
| 值的数目     | 10         | 10    | 10    | 10       | 10          | 10               |
| 最小       | 99.40      | 152.5 | 100.1 | 142.6    | 202.9       | 196.9            |
| 最大值      | 152.8      | 288.7 | 158.2 | 176.1    | 287.3       | 267.8            |
| 范围       | 53.39      | 136.2 | 58.16 | 33.45    | 84.45       | 70.89            |
| 平均:      | mean 127.7 | 237.7 | 128.8 | 164.9    | 246.8       | 230.6            |
| 标准偏差     | SD 16.04   | 41.89 | 18.86 | 8.844    | 26.64       | 22.91            |
| 标准误差的平均值 | 5.072      | 13.25 | 5.966 | 2.797    | 8.425       | 7.244            |

## TNNT2

| 组 A         | 组 B         | 组 C         | 组 D          | 组 E         | 组 F              |
|-------------|-------------|-------------|--------------|-------------|------------------|
| Con         | DOX         | AP39        | DOX+AP39     | DOX+AP39+CC | DOX+AP39+Genipin |
| 405.7892308 | 1993.015385 | 447.4500000 | 806.8538462  | 1730.938462 | 1911.800000      |
| 240.1515385 | 1841.030769 | 371.8653846 | 938.5461538  | 1896.184615 | 1819.069231      |
| 294.3392308 | 1894.615385 | 266.8446154 | 945.2153846  | 1964.715385 | 1558.546154      |
| 278.4230769 | 1625.946154 | 212.1807692 | 1150.5615380 | 1644.184615 | 1663.015385      |
| 353.3276923 | 1605.300000 | 309.2053846 | 900.3538462  | 1814.815385 | 2005.123077      |
| 198.3915385 | 1638.923077 | 174.9192308 | 779.3000000  | 1663.661538 | 1988.176923      |
| 234.8476923 | 1636.638462 | 193.3592308 | 924.6538462  | 1748.076923 | 1989.153846      |
| 360.9746154 | 1748.230769 | 346.0123077 | 860.4846154  | 1709.184615 | 1914.392308      |
| 183.3469231 | 1802.900000 | 264.5630769 | 1156.4153850 | 1697.992308 | 2028.084615      |
| 255.9084615 | 1879.461538 | 233.9276923 | 939.6692308  | 1689.730769 | 2076.615385      |

| 描述性统计    | A          | B     | C     | D        | E           | F                |
|----------|------------|-------|-------|----------|-------------|------------------|
|          | Con        | DOX   | AP39  | DOX+AP39 | DOX+AP39+CC | DOX+AP39+Genipin |
| 值的数目     | 10         | 10    | 10    | 10       | 10          | 10               |
| 最小       | 183.3      | 1605  | 174.9 | 779.3    | 1644        | 1559             |
| 最大值      | 405.8      | 1993  | 447.5 | 1156     | 1965        | 2077             |
| 范围       | 222.4      | 387.7 | 272.5 | 377.1    | 320.5       | 518.1            |
| 平均:      | mean 280.6 | 1767  | 282.0 | 940.2    | 1756        | 1895             |
| 标准偏差     | SD 73.16   | 136.0 | 86.49 | 126.0    | 104.5       | 167.9            |
| 标准误差的平均值 | 23.14      | 43.02 | 27.35 | 39.84    | 33.06       | 53.10            |



## LDH

| 组 A         | 组 B         | 组 C         | 组 D         | 组 E         | 组 F              |
|-------------|-------------|-------------|-------------|-------------|------------------|
| Con         | DOX         | AP39        | DOX+AP39    | DOX+AP39+CC | DOX+AP39+Genipin |
| 191.0170824 | 260.3436203 | 193.2715875 | 214.1133095 | 247.0624334 | 244.8881486      |
| 190.5862365 | 262.1156770 | 203.8011740 | 220.4367399 | 267.8667493 | 248.6986115      |
| 189.0190118 | 252.0651588 | 197.7977233 | 216.6995118 | 248.1021422 | 270.3828716      |
| 183.3659615 | 221.4843355 | 202.9259618 | 208.4805395 | 216.4324865 | 238.2454145      |
| 199.8079622 | 263.0249152 | 170.3596868 | 205.3226551 | 260.5603953 | 248.6017162      |
| 184.0498618 | 240.4113618 | 190.9082443 | 195.9488264 | 228.2343304 | 252.9606514      |
| 166.7051578 | 246.1333655 | 186.3478571 | 213.0821635 | 259.1128250 | 231.7775426      |
| 168.8654716 | 211.5500916 | 172.0366510 | 226.0985784 | 276.0861723 | 214.9010905      |
| 169.5692017 | 266.1631953 | 168.2559328 | 190.3020855 | 219.3449780 | 272.6452635      |
| 195.1439196 | 266.3261145 | 164.6629209 | 185.7033909 | 248.2231486 | 275.3745554      |

| 描述性统计    | A     | B     | C     | D        | E           | F                |
|----------|-------|-------|-------|----------|-------------|------------------|
|          | Con   | DOX   | AP39  | DOX+AP39 | DOX+AP39+CC | DOX+AP39+Genipin |
| 值的数目     | 10    | 10    | 10    | 10       | 10          | 10               |
| 最小       | 166.7 | 211.6 | 164.7 | 185.7    | 216.4       | 214.9            |
| 最大值      | 199.8 | 266.3 | 203.8 | 226.1    | 276.1       | 275.4            |
| 范围       | 33.10 | 54.78 | 39.14 | 40.40    | 59.65       | 60.47            |
| 平均: mean | 183.8 | 249.0 | 185.0 | 207.6    | 247.1       | 249.8            |
| 标准偏差 SD  | 11.68 | 19.27 | 14.98 | 13.26    | 20.18       | 19.19            |
| 标准误差的平均值 | 3.694 | 6.095 | 4.738 | 4.193    | 6.382       | 6.067            |

## BNP

| 组 A         | 组 B         | 组 C         | 组 D          | 组 E         | 组 F              |
|-------------|-------------|-------------|--------------|-------------|------------------|
| Con         | DOX         | AP39        | DOX+AP39     | DOX+AP39+CC | DOX+AP39+Genipin |
| 360.7166667 | 1829.733333 | 337.4666667 | 1487.8500000 | 1744.181667 | 1737.868333      |
| 303.2500000 | 1630.936667 | 380.8500000 | 1120.5833330 | 1782.908333 | 1650.050000      |
| 337.5166667 | 1873.883333 | 711.7500000 | 1233.6633330 | 1658.383333 | 1624.963333      |
| 784.9000000 | 1747.891667 | 753.2633333 | 966.4466667  | 1632.008333 | 1730.978333      |
| 763.5333333 | 1641.463333 | 321.4666667 | 1204.3300000 | 1759.471667 | 1580.966667      |
| 761.2166667 | 1463.366667 | 349.3833333 | 1076.7500000 | 1668.916667 | 1733.130000      |
| 339.5333333 | 1520.650000 | 762.0833333 | 1256.7000000 | 1566.250000 | 1648.088333      |
| 905.1666667 | 1600.283333 | 797.4166667 | 1104.8333330 | 1729.401667 | 1539.090000      |
| 376.2833333 | 1571.950000 | 751.7333333 | 989.0333333  | 1656.900000 | 1509.408333      |
| 373.4333333 | 1739.466667 | 917.0833333 | 1170.4666670 | 1773.710000 | 1693.280000      |

| 描述性统计    | A     | B     | C     | D        | E           | F                |
|----------|-------|-------|-------|----------|-------------|------------------|
|          | Con   | DOX   | AP39  | DOX+AP39 | DOX+AP39+CC | DOX+AP39+Genipin |
| 值的数目     | 10    | 10    | 10    | 10       | 10          | 10               |
| 最小       | 660.7 | 1463  | 711.8 | 966.4    | 1566        | 1509             |
| 最大值      | 939.5 | 1874  | 937.5 | 1488     | 1783        | 1738             |
| 范围       | 278.8 | 410.5 | 225.7 | 521.4    | 216.7       | 228.5            |
| 平均: mean | 820.6 | 1662  | 818.2 | 1161     | 1697        | 1645             |
| 标准偏差 SD  | 82.59 | 133.0 | 76.35 | 150.0    | 71.22       | 81.82            |
| 标准误差的平均值 | 26.12 | 42.05 | 24.14 | 47.44    | 22.52       | 25.87            |

## G

## SOD

| 组 A         | 组 B         | 组 C         | 组 D         | 组 E         | 组 F              |
|-------------|-------------|-------------|-------------|-------------|------------------|
| Con         | DOX         | AP39        | DOX+AP39    | DOX+AP39+CC | DOX+AP39+Genipin |
| 3.678322163 | 1.387937660 | 3.143787646 | 2.203398675 | 1.366996114 | 1.182142501      |
| 3.111591853 | 0.820117939 | 3.880853080 | 2.543357817 | 1.264484560 | 1.000911890      |
| 3.652042732 | 0.749838863 | 3.347991487 | 2.119313909 | 1.279715420 | 1.195154067      |
| 4.034078016 | 1.251256129 | 3.948118441 | 2.593569956 | 0.951133733 | 0.857163666      |
| 3.162651677 | 0.942158274 | 3.246553867 | 1.491755895 | 0.982609493 | 1.112074687      |
| 3.074502882 | 1.037677294 | 4.034167330 | 2.067858396 | 1.148356828 | 1.078992088      |
| 3.159334952 | 1.100547893 | 3.409304952 | 2.191359476 | 0.916157658 | 0.805489015      |
| 3.035150106 | 0.788657546 | 3.637843429 | 1.080506452 | 1.060755515 | 1.498843043      |
| 3.508957761 | 1.060696305 | 3.454692279 | 1.513949834 | 1.025169646 | 1.121797314      |
| 3.539813260 | 1.106134737 | 3.169499530 | 2.101229050 | 1.281974331 | 0.745972604      |

| 描述性统计    | A      | B       | C      | D        | E           | F                |
|----------|--------|---------|--------|----------|-------------|------------------|
|          | Con    | DOX     | AP39   | DOX+AP39 | DOX+AP39+CC | DOX+AP39+Genipin |
| 值的数目     | 10     | 10      | 10     | 10       | 10          | 10               |
| 最小       | 3.035  | 0.7498  | 3.144  | 1.081    | 0.9162      | 0.7460           |
| 最大值      | 4.034  | 1.388   | 4.034  | 2.594    | 1.367       | 1.499            |
| 范围       | 0.9989 | 0.6381  | 0.8904 | 1.513    | 0.4508      | 0.7529           |
| 平均: mean | 3.396  | 1.025   | 3.527  | 1.991    | 1.128       | 1.060            |
| 标准偏差 SD  | 0.3351 | 0.2047  | 0.3294 | 0.4823   | 0.1617      | 0.2213           |
| 标准误差的平均值 | 0.1060 | 0.06473 | 0.1042 | 0.1525   | 0.05113     | 0.06997          |

## GSH-Px

| 组 A         | 组 B         | 组 C         | 组 D         | 组 E          | 组 F              |
|-------------|-------------|-------------|-------------|--------------|------------------|
| Con         | DOX         | AP39        | DOX+AP39    | DOX+AP39+CC  | DOX+AP39+Genipin |
| 145.8152685 | 33.98486467 | 152.9653459 | 123.3893363 | 91.02276048  | 85.56786226      |
| 153.5378311 | 31.81389199 | 164.9063344 | 129.9570277 | 84.11620892  | 94.37623060      |
| 149.8324862 | 38.97259257 | 151.8911975 | 124.6471271 | 85.05677744  | 84.68470195      |
| 166.1524679 | 87.73021173 | 154.9032524 | 130.2866259 | 86.32790231  | 97.35986088      |
| 155.4323022 | 32.03705744 | 147.0047923 | 121.9770463 | 94.93514229  | 88.35978583      |
| 156.1407627 | 30.22107353 | 159.4049666 | 115.7349609 | 90.43989544  | 84.88702798      |
| 149.7116814 | 74.09492237 | 156.2333824 | 133.4079081 | 80.75475434  | 82.50502621      |
| 153.0675469 | 36.87962799 | 155.0005829 | 123.2831431 | 107.71825100 | 81.01832113      |
| 151.6215625 | 31.33654947 | 154.1175024 | 117.8960328 | 88.79509818  | 83.04876744      |
| 164.2952842 | 34.02331780 | 165.6351552 | 114.2375566 | 108.46878960 | 89.40519021      |

| 描述性统计    | A     | B     | C     | D        | E           | F                |
|----------|-------|-------|-------|----------|-------------|------------------|
|          | Con   | DOX   | AP39  | DOX+AP39 | DOX+AP39+CC | DOX+AP39+Genipin |
| 值的数目     | 10    | 10    | 10    | 10       | 10          | 10               |
| 最小       | 145.8 | 74.09 | 147.0 | 114.2    | 80.75       | 81.02            |
| 最大值      | 166.2 | 94.02 | 165.6 | 133.4    | 108.5       | 97.36            |
| 范围       | 20.34 | 19.93 | 18.63 | 19.17    | 27.71       | 16.34            |
| 平均: mean | 154.6 | 85.11 | 156.2 | 123.5    | 91.76       | 87.12            |
| 标准偏差 SD  | 6.383 | 5.868 | 5.736 | 6.387    | 9.481       | 5.299            |
| 标准误差的平均值 | 2.018 | 1.856 | 1.814 | 2.020    | 2.998       | 1.676            |



## MDA

| 组 A         | 组 B         | 组 C         | 组 D         | 组 E         | 组 F              |
|-------------|-------------|-------------|-------------|-------------|------------------|
| Con         | DOX         | AP39        | DOX+AP39    | DOX+AP39+CC | DOX+AP39+Genipin |
| 0.451184595 | 1.342110195 | 0.238773195 | 0.768253695 | 1.415149995 | 1.009251495      |
| 0.387806895 | 1.283208795 | 0.365696295 | 0.648777120 | 1.461331995 | 1.775898495      |
| 0.391393095 | 1.297553595 | 0.334162245 | 0.772136595 | 0.958747995 | 1.090134495      |
| 0.280253145 | 1.042559295 | 0.486956295 | 0.632648895 | 1.255899495 | 1.600587495      |
| 0.326260995 | 1.102247595 | 0.412690995 | 0.763996695 | 0.960747495 | 1.276152495      |
| 0.394063395 | 1.496452245 | 0.374061945 | 0.484737495 | 1.052337495 | 1.197720495      |
| 0.389445195 | 0.884121495 | 0.424307445 | 0.721813695 | 1.603812495 | 1.668312495      |
| 0.326235195 | 1.201964595 | 0.377448195 | 0.632829495 | 1.116192495 | 0.879090495      |
| 0.246113295 | 1.263162195 | 0.404718795 | 0.641794995 | 1.274604495 | 0.786210495      |
| 0.215424195 | 0.895679895 | 0.181161795 | 0.567800595 | 0.761635995 | 1.055433495      |

| 描述性统计    | A       | B       | C       | D        | E           | F                |
|----------|---------|---------|---------|----------|-------------|------------------|
|          | Con     | DOX     | AP39    | DOX+AP39 | DOX+AP39+CC | DOX+AP39+Genipin |
| 值的数目     | 10      | 10      | 10      | 10       | 10          | 10               |
| 最小       | 0.2154  | 0.8841  | 0.1812  | 0.4847   | 0.7616      | 0.7862           |
| 最大值      | 0.4512  | 1.496   | 0.4870  | 0.7721   | 1.604       | 1.776            |
| 范围       | 0.2358  | 0.6123  | 0.3058  | 0.2874   | 0.8422      | 0.9897           |
| 平均: mean | 0.3408  | 1.181   | 0.3600  | 0.6635   | 1.186       | 1.234            |
| 标准偏差 SD  | 0.07523 | 0.1977  | 0.09001 | 0.09426  | 0.2626      | 0.3415           |
| 标准误差的平均值 | 0.02379 | 0.06250 | 0.02846 | 0.02981  | 0.08305     | 0.1080           |

## NADPH

| 组 A         | 组 B         | 组 C         | 组 D          | 组 E         | 组 F              |
|-------------|-------------|-------------|--------------|-------------|------------------|
| Con         | DOX         | AP39        | DOX+AP39     | DOX+AP39+CC | DOX+AP39+Genipin |
| 4.146118510 | 15.06427808 | 4.116976132 | 9.791839035  | 19.39587163 | 19.86603533      |
| 2.663095270 | 15.27371463 | 3.354741043 | 10.967377810 | 19.01637311 | 14.56859861      |
| 3.206309197 | 18.58662017 | 2.155888370 | 12.830547180 | 15.46100298 | 18.40632600      |
| 3.395669894 | 22.68649945 | 3.016559936 | 9.176999618  | 15.79387370 | 19.36478643      |
| 3.014358067 | 20.38554679 | 4.251290114 | 11.920398330 | 20.28568558 | 13.77592592      |
| 3.510685146 | 19.40066394 | 3.132093274 | 9.091256266  | 17.91284839 | 19.97742398      |
| 4.499453654 | 21.30722307 | 3.018502761 | 11.238984770 | 17.36626690 | 22.61578061      |
| 3.234415402 | 15.10183936 | 4.394929658 | 10.588138330 | 13.72023160 | 14.19816660      |
| 2.148376112 | 14.75355557 | 3.884096151 | 10.662483770 | 15.60736248 | 15.57498206      |
| 3.523896358 | 18.97971847 | 2.096049353 | 9.050845502  | 17.05800530 | 20.14709738      |

| 描述性统计    | A      | B      | C      | D        | E           | F                |
|----------|--------|--------|--------|----------|-------------|------------------|
|          | Con    | DOX    | AP39   | DOX+AP39 | DOX+AP39+CC | DOX+AP39+Genipin |
| 值的数目     | 10     | 10     | 10     | 10       | 10          | 10               |
| 最小       | 2.148  | 14.75  | 2.096  | 9.051    | 13.72       | 13.78            |
| 最大值      | 4.499  | 22.69  | 4.395  | 12.83    | 20.29       | 22.62            |
| 范围       | 2.351  | 7.933  | 2.299  | 3.780    | 6.565       | 8.840            |
| 平均: mean | 3.334  | 18.15  | 3.342  | 10.53    | 17.16       | 17.85            |
| 标准偏差 SD  | 0.6727 | 2.918  | 0.8195 | 1.273    | 2.050       | 3.074            |
| 标准误差的平均值 | 0.2127 | 0.9226 | 0.2591 | 0.4024   | 0.6483      | 0.9722           |

## H

### p-AMPK/AMPK

| 组 A         | 组 B         | 组 C         | 组 D         |
|-------------|-------------|-------------|-------------|
| Con         | DOX         | AP39        | DOX+AP39    |
| 1.042797992 | 0.533206950 | 0.930420736 | 0.819701062 |
| 0.955272719 | 0.488885360 | 1.058132790 | 0.785889071 |
| 1.020550449 | 0.463960885 | 0.871578728 | 0.643831701 |
| 0.981378840 | 0.405172339 | 1.049241789 | 0.918724810 |

| 描述性统计    | A       | B       | C       | D        |
|----------|---------|---------|---------|----------|
|          | Con     | DOX     | AP39    | DOX+AP39 |
| 值的数目     | 4       | 4       | 4       | 4        |
| 最小       | 0.9553  | 0.4052  | 0.8716  | 0.6438   |
| 最大值      | 1.043   | 0.5332  | 1.058   | 0.9187   |
| 范围       | 0.08753 | 0.1280  | 0.1866  | 0.2749   |
| 平均: mean | 1.000   | 0.4728  | 0.9773  | 0.7920   |
| 标准偏差 SD  | 0.03916 | 0.05341 | 0.09144 | 0.1138   |
| 标准误差的平均值 | 0.01958 | 0.02671 | 0.04572 | 0.05688  |

## UCP2

| 组 A         | 组 B         | 组 C         | 组 D         |
|-------------|-------------|-------------|-------------|
| Con         | DOX         | AP39        | DOX+AP39    |
| 0.822966849 | 0.410369580 | 0.880657844 | 0.673042855 |
| 1.213663363 | 0.537145461 | 0.979687543 | 0.677313892 |
| 0.904982347 | 0.393380207 | 0.900379632 | 0.659221528 |
| 1.058387442 | 0.342245416 | 0.920516043 | 0.650091746 |

| 描述性统计    | A       | B       | C       | D        |
|----------|---------|---------|---------|----------|
|          | Con     | DOX     | AP39    | DOX+AP39 |
| 值的数目     | 4       | 4       | 4       | 4        |
| 最小       | 0.8230  | 0.3422  | 0.8807  | 0.6501   |
| 最大值      | 1.214   | 0.5371  | 0.9797  | 0.6773   |
| 范围       | 0.3907  | 0.1949  | 0.09903 | 0.02722  |
| 平均: mean | 1.000   | 0.4208  | 0.9203  | 0.6649   |
| 标准偏差 SD  | 0.1727  | 0.08280 | 0.04280 | 0.01254  |
| 标准误差的平均值 | 0.08633 | 0.04140 | 0.02140 | 0.006271 |

## Bax

| 组 A         | 组 B         | 组 C         | 组 D         | 组 E         |
|-------------|-------------|-------------|-------------|-------------|
| Con         | DOX         | AP39        | DOX+AP39    | DOX+AP39+CC |
| 1.093096991 | 1.828317743 | 1.074950019 | 1.086106278 | 1.311438707 |
| 0.985575534 | 1.865676572 | 1.018510138 | 1.173012930 | 1.418451372 |
| 0.921327475 | 1.648436360 | 1.016937590 | 1.096779613 | 1.411733390 |

| 描述性统计    | A       | B       | C       | D        | E           |
|----------|---------|---------|---------|----------|-------------|
|          | Con     | DOX     | AP39    | DOX+AP39 | DOX+AP39+CC |
| 值的数目     | 3       | 3       | 3       | 3        | 3           |
| 最小       | 0.9213  | 1.648   | 1.017   | 1.086    | 1.311       |
| 最大值      | 1.093   | 1.866   | 1.075   | 1.173    | 1.418       |
| 范围       | 0.1718  | 0.2172  | 0.05801 | 0.08691  | 0.1070      |
| 平均: mean | 1.000   | 1.781   | 1.037   | 1.119    | 1.381       |
| 标准偏差 SD  | 0.08679 | 0.1162  | 0.03305 | 0.04740  | 0.05994     |
| 标准误差的平均值 | 0.05011 | 0.06706 | 0.01908 | 0.02736  | 0.03461     |

## Bcl-2

| 组 A         | 组 B         | 组 C         | 组 D         | 组 E         |
|-------------|-------------|-------------|-------------|-------------|
| Con         | DOX         | AP39        | DOX+AP39    | DOX+AP39+CC |
| 1.122564812 | 0.387561824 | 1.019863545 | 0.886397010 | 0.607022940 |
| 1.045846831 | 0.397841051 | 1.115832013 | 0.885163716 | 0.599556617 |
| 0.998957747 | 0.404739778 | 0.950085917 | 0.909413604 | 0.618999490 |
| 0.832630611 | 0.243213503 | 0.981689405 | 0.936792384 | 0.671500074 |

| 描述性统计    | A       | B       | C       | D        | E           |
|----------|---------|---------|---------|----------|-------------|
|          | Con     | DOX     | AP39    | DOX+AP39 | DOX+AP39+CC |
| 值的数目     | 4       | 4       | 4       | 4        | 4           |
| 最小       | 0.8326  | 0.2432  | 0.9501  | 0.8852   | 0.5996      |
| 最大值      | 1.123   | 0.4047  | 1.116   | 0.9368   | 0.6715      |
| 范围       | 0.2899  | 0.1615  | 0.1657  | 0.05163  | 0.07194     |
| 平均: mean | 1.000   | 0.3583  | 1.017   | 0.9044   | 0.6243      |
| 标准偏差 SD  | 0.1227  | 0.07707 | 0.07188 | 0.02428  | 0.03249     |
| 标准误差的平均值 | 0.06133 | 0.03854 | 0.03594 | 0.01214  | 0.01624     |

## Cleaved Caspase3/Caspase3

| 组 A         | 组 B          | 组 C         | 组 D          | 组 E          |
|-------------|--------------|-------------|--------------|--------------|
| Con         | DOX          | AP39        | DOX+AP39     | DOX+AP39+CC  |
| 0.455923569 | 17.981940300 | 0.499225833 | 9.663087128  | 16.307158250 |
| 0.466180772 | 19.401560610 | 0.372472568 | 11.264512450 | 19.120195860 |
| 0.742240609 | 17.136090440 | 0.524052344 | 11.993632360 | 13.697903130 |
| 2.335655050 | 21.093669730 | 1.829021440 | 4.759255976  | 11.688265700 |

| 描述性统计    | A      | B      | C      | D        | E           |
|----------|--------|--------|--------|----------|-------------|
|          | Con    | DOX    | AP39   | DOX+AP39 | DOX+AP39+CC |
| 值的数目     | 4      | 4      | 4      | 4        | 4           |
| 最小       | 0.4559 | 17.14  | 0.3725 | 4.759    | 11.69       |
| 最大值      | 2.336  | 21.09  | 1.829  | 11.99    | 19.12       |
| 范围       | 1.880  | 3.958  | 1.457  | 7.234    | 7.432       |
| 平均: mean | 1.000  | 18.90  | 0.8062 | 9.420    | 15.20       |
| 标准偏差 SD  | 0.9003 | 1.734  | 0.6851 | 3.256    | 3.224       |
| 标准误差的平均值 | 0.4501 | 0.8669 | 0.3426 | 1.628    | 1.612       |

## Bax

| 组 A         | 组 B         | 组 C         | 组 D         | 组 E              |
|-------------|-------------|-------------|-------------|------------------|
| Con         | DOX         | AP39        | DOX+AP39    | DOX+AP39+Genipin |
| 1.077753344 | 2.030310783 | 1.159942622 | 1.463518105 | 1.726870052      |
| 0.963562710 | 1.763272434 | 1.070417885 | 1.400009965 | 1.578629702      |
| 0.958683946 | 2.001435803 | 1.286185456 | 1.541592023 | 1.770433599      |

| 描述性统计    | A       | B       | C       | D        | E                |
|----------|---------|---------|---------|----------|------------------|
|          | Con     | DOX     | AP39    | DOX+AP39 | DOX+AP39+Genipin |
| 值的数目     | 3       | 3       | 3       | 3        | 3                |
| 最小       | 0.9587  | 1.763   | 1.070   | 1.400    | 1.579            |
| 最大值      | 1.078   | 2.030   | 1.286   | 1.542    | 1.770            |
| 范围       | 0.1191  | 0.2670  | 0.2158  | 0.1416   | 0.1918           |
| 平均: mean | 1.000   | 1.932   | 1.172   | 1.468    | 1.692            |
| 标准偏差 SD  | 0.06738 | 0.1466  | 0.1084  | 0.07092  | 0.1005           |
| 标准误差的平均值 | 0.03890 | 0.08461 | 0.06259 | 0.04094  | 0.05805          |

## Bcl-2

| 组 A         | 组 B         | 组 C         | 组 D         | 组 E              |
|-------------|-------------|-------------|-------------|------------------|
| Con         | DOX         | AP39        | DOX+AP39    | DOX+AP39+Genipin |
| 1.098238286 | 0.355058102 | 0.867747347 | 0.618365378 | 0.393466489      |
| 1.039404182 | 0.291569481 | 0.911438564 | 0.736948211 | 0.400537703      |
| 0.923321490 | 0.248868179 | 0.923427602 | 0.765906652 | 0.555690514      |
| 0.939036042 | 0.274415146 | 1.010340952 | 0.782196352 | 0.472896560      |

| 描述性统计    | A       | B       | C       | D        | E                |
|----------|---------|---------|---------|----------|------------------|
|          | Con     | DOX     | AP39    | DOX+AP39 | DOX+AP39+Genipin |
| 值的数目     | 4       | 4       | 4       | 4        | 4                |
| 最小       | 0.9233  | 0.2489  | 0.8677  | 0.6184   | 0.3935           |
| 最大值      | 1.098   | 0.3551  | 1.010   | 0.7822   | 0.5557           |
| 范围       | 0.1749  | 0.1062  | 0.1426  | 0.1638   | 0.1622           |
| 平均: mean | 1.000   | 0.2925  | 0.9282  | 0.7259   | 0.4556           |
| 标准偏差 SD  | 0.08327 | 0.04526 | 0.05974 | 0.07406  | 0.07574          |
| 标准误差的平均值 | 0.04163 | 0.02263 | 0.02987 | 0.03703  | 0.03787          |



## Cleaved Caspase3/Caspase3

| 组 A         | 组 B         | 组 C         | 组 D         | 组 E              |
|-------------|-------------|-------------|-------------|------------------|
| Con         | DOX         | AP39        | DOX+AP39    | DOX+AP39+Genipin |
| 2.054983617 | 9.305240583 | 1.033263397 | 4.018325343 | 7.884238236      |
| 0.794255929 | 8.879411283 | 0.642225906 | 7.192054320 | 9.033052072      |
| 0.320925088 | 3.699943860 | 0.337298862 | 3.034048505 | 8.363199396      |
| 0.829835366 | 9.623976642 | 0.921512059 | 7.422409757 | 9.729698621      |

| 描述性统计    | A      | B      | C      | D        | E                |
|----------|--------|--------|--------|----------|------------------|
|          | Con    | DOX    | AP39   | DOX+AP39 | DOX+AP39+Genipin |
| 值的数目     | 4      | 4      | 4      | 4        | 4                |
| 最小       | 0.3209 | 8.700  | 0.3373 | 4.018    | 7.884            |
| 最大值      | 2.055  | 9.624  | 1.033  | 7.422    | 9.730            |
| 范围       | 1.734  | 0.9240 | 0.6960 | 3.404    | 1.845            |
| 平均: mean | 1.000  | 9.127  | 0.7336 | 6.167    | 8.753            |
| 标准偏差 SD  | 0.7406 | 0.4173 | 0.3112 | 1.556    | 0.8040           |
| 标准误差的平均值 | 0.3703 | 0.2087 | 0.1556 | 0.7779   | 0.4020           |
