# Supplementary material for: AP39, a novel mitochondria-targeted hydrogen sulfide donor ameliorates doxorubicin-induced cardiotoxicity by regulating the AMPK/UCP2 pathway
Source: PubMed Central journal article supplement (PMC10990198; doi:10.1371/journal.pone.0300261), 2024-04-03
Supplement: pone.0300261.s004.pdf [file pone.0300261.s004.pdf]

# PLOS ONE

## AP39 ameliorates doxorubicin-induced cardiotoxicity by regulating the AMPK/UCP2 pathway

--Manuscript Draft--

|                                                                                                                                                                                                                                                                                                                                                                                                                                                                                              |                                                                                                                                                                                                                                                                                                                                                                                                                                                                                                                                                                                                                                                                                                                                                                                                                                                                                                                                                                                                                                                                                                                                                                                                                                                                                 |
|----------------------------------------------------------------------------------------------------------------------------------------------------------------------------------------------------------------------------------------------------------------------------------------------------------------------------------------------------------------------------------------------------------------------------------------------------------------------------------------------|---------------------------------------------------------------------------------------------------------------------------------------------------------------------------------------------------------------------------------------------------------------------------------------------------------------------------------------------------------------------------------------------------------------------------------------------------------------------------------------------------------------------------------------------------------------------------------------------------------------------------------------------------------------------------------------------------------------------------------------------------------------------------------------------------------------------------------------------------------------------------------------------------------------------------------------------------------------------------------------------------------------------------------------------------------------------------------------------------------------------------------------------------------------------------------------------------------------------------------------------------------------------------------|
| <b>Manuscript Number:</b>                                                                                                                                                                                                                                                                                                                                                                                                                                                                    | PONE-D-23-34322                                                                                                                                                                                                                                                                                                                                                                                                                                                                                                                                                                                                                                                                                                                                                                                                                                                                                                                                                                                                                                                                                                                                                                                                                                                                 |
| <b>Article Type:</b>                                                                                                                                                                                                                                                                                                                                                                                                                                                                         | Research Article                                                                                                                                                                                                                                                                                                                                                                                                                                                                                                                                                                                                                                                                                                                                                                                                                                                                                                                                                                                                                                                                                                                                                                                                                                                                |
| <b>Full Title:</b>                                                                                                                                                                                                                                                                                                                                                                                                                                                                           | AP39 ameliorates doxorubicin-induced cardiotoxicity by regulating the AMPK/UCP2 pathway                                                                                                                                                                                                                                                                                                                                                                                                                                                                                                                                                                                                                                                                                                                                                                                                                                                                                                                                                                                                                                                                                                                                                                                         |
| <b>Short Title:</b>                                                                                                                                                                                                                                                                                                                                                                                                                                                                          | AP39 ameliorates doxorubicin-induced cardiotoxicity                                                                                                                                                                                                                                                                                                                                                                                                                                                                                                                                                                                                                                                                                                                                                                                                                                                                                                                                                                                                                                                                                                                                                                                                                             |
| <b>Corresponding Author:</b>                                                                                                                                                                                                                                                                                                                                                                                                                                                                 | Bin Liu, M.D.<br>The Second Hospital of Jilin University<br>Changchun, Jilin CHINA                                                                                                                                                                                                                                                                                                                                                                                                                                                                                                                                                                                                                                                                                                                                                                                                                                                                                                                                                                                                                                                                                                                                                                                              |
| <b>Keywords:</b>                                                                                                                                                                                                                                                                                                                                                                                                                                                                             | AP39; Doxorubicin; Cardiotoxicity; AMPK; UCP2                                                                                                                                                                                                                                                                                                                                                                                                                                                                                                                                                                                                                                                                                                                                                                                                                                                                                                                                                                                                                                                                                                                                                                                                                                   |
| <b>Abstract:</b>                                                                                                                                                                                                                                                                                                                                                                                                                                                                             | Doxorubicin (DOX) is a broad-spectrum, highly effective antitumor agent, however, its cardiotoxicity has greatly limited its use. Hydrogen sulfide (H <sub>2</sub> S) is an endogenous gaseous transmitter that exerts cardioprotective effects via the regulation of oxidative stress and apoptosis and maintenance of mitochondrial function, among other mechanisms. AP39 is a novel mitochondria-targeted H <sub>2</sub> S donor that, at appropriate concentrations, attenuates intracellular oxidative stress damage, maintains mitochondrial function, and ameliorates cardiomyocyte injury. In this study, DOX-induced cardiotoxicity models were established with H9c2 cells and Sprague–Dawley rats to evaluate the protective effect of AP39 and its mechanisms of action. Both in vivo and in vitro experiments showed that DOX induces oxidative stress injury, apoptosis, and mitochondrial damage in cardiomyocytes and decreases the expression of p-AMPK/AMPK and UCP2. All DOX-induced changes were attenuated by AP39 treatment. Furthermore, the protective effect of AP39 was significantly attenuated by the inhibition of AMPK and UCP2. The results suggest that AP39 ameliorates DOX-induced cardiotoxicity by regulating the expression of AMPK/UCP2. |
| <b>Order of Authors:</b>                                                                                                                                                                                                                                                                                                                                                                                                                                                                     | Bin Zhang<br>Yangxue Li<br>Ning Liu<br>Bin Liu, M.D.                                                                                                                                                                                                                                                                                                                                                                                                                                                                                                                                                                                                                                                                                                                                                                                                                                                                                                                                                                                                                                                                                                                                                                                                                            |
| <b>Additional Information:</b>                                                                                                                                                                                                                                                                                                                                                                                                                                                               |                                                                                                                                                                                                                                                                                                                                                                                                                                                                                                                                                                                                                                                                                                                                                                                                                                                                                                                                                                                                                                                                                                                                                                                                                                                                                 |
| <b>Question</b>                                                                                                                                                                                                                                                                                                                                                                                                                                                                              | <b>Response</b>                                                                                                                                                                                                                                                                                                                                                                                                                                                                                                                                                                                                                                                                                                                                                                                                                                                                                                                                                                                                                                                                                                                                                                                                                                                                 |
| <b>Financial Disclosure</b><br><br>Enter a financial disclosure statement that describes the sources of funding for the work included in this submission. Review the <a href="#">submission guidelines</a> for detailed requirements. View published research articles from <a href="#">PLOS ONE</a> for specific examples.<br><br>This statement is required for submission and <b>will appear in the published article</b> if the submission is accepted. Please make sure it is accurate. | Yes                                                                                                                                                                                                                                                                                                                                                                                                                                                                                                                                                                                                                                                                                                                                                                                                                                                                                                                                                                                                                                                                                                                                                                                                                                                                             |

|                                                                                                                                                                                                                                                                                                                                                                                                                                                                                                                                                  |                                                                                                                                                                                                                                      |
|--------------------------------------------------------------------------------------------------------------------------------------------------------------------------------------------------------------------------------------------------------------------------------------------------------------------------------------------------------------------------------------------------------------------------------------------------------------------------------------------------------------------------------------------------|--------------------------------------------------------------------------------------------------------------------------------------------------------------------------------------------------------------------------------------|
| <p><b>Funded studies</b></p> <p>Enter a statement with the following details:</p> <ul style="list-style-type: none"> <li>• Initials of the authors who received each award</li> <li>• Grant numbers awarded to each author</li> <li>• The full name of each funder</li> <li>• URL of each funder website</li> <li>• Did the sponsors or funders play any role in the study design, data collection and analysis, decision to publish, or preparation of the manuscript?</li> </ul> <p>Did you receive funding for this work?</p>                 |                                                                                                                                                                                                                                      |
| <p>Please add funding details. as follow-up to "<b>Financial Disclosure</b></p> <p>Enter a financial disclosure statement that describes the sources of funding for the work included in this submission. Review the <a href="#">submission guidelines</a> for detailed requirements. View published research articles from <a href="#">PLOS ONE</a> for specific examples.</p> <p>This statement is required for submission and <b>will appear in the published article</b> if the submission is accepted. Please make sure it is accurate.</p> | <p>This work was supported by Jilin Province Science and Technology Department (20220303002SF), Jilin Provincial Development and Reform Commission (2022C003), Jilin Province Science and Technology Department (20190905002SF).</p> |
| <p><b>Funded studies</b></p> <p>Enter a statement with the following details:</p> <ul style="list-style-type: none"> <li>• Initials of the authors who received each award</li> <li>• Grant numbers awarded to each author</li> <li>• The full name of each funder</li> <li>• URL of each funder website</li> <li>• Did the sponsors or funders play any role in the study design, data collection and analysis, decision to publish, or preparation of the manuscript?</li> </ul> <p>Did you receive funding for this work?"</p>                |                                                                                                                                                                                                                                      |
| <p>Please select the country of your main research funder (please select carefully as in some cases this is used in fee calculation).</p>                                                                                                                                                                                                                                                                                                                                                                                                        | <p>CHINA - CN</p>                                                                                                                                                                                                                    |

as follow-up to "**Financial Disclosure**

Enter a financial disclosure statement that describes the sources of funding for the work included in this submission. Review the [submission guidelines](#) for detailed requirements. View published research articles from [PLOS ONE](#) for specific examples.

This statement is required for submission and **will appear in the published article** if the submission is accepted. Please make sure it is accurate.

#### Funded studies

Enter a statement with the following details:

- Initials of the authors who received each award
- Grant numbers awarded to each author
- The full name of each funder
- URL of each funder website
- Did the sponsors or funders play any role in the study design, data collection and analysis, decision to publish, or preparation of the manuscript?

Did you receive funding for this work?"

#### Competing Interests

Use the instructions below to enter a competing interest statement for this submission. On behalf of all authors, disclose any [competing interests](#) that could be perceived to bias this work—acknowledging all financial support and any other relevant financial or non-financial competing interests.

This statement is **required** for submission and **will appear in the published article** if the submission is accepted. Please make sure it is accurate and that any funding sources listed in your Funding Information later in the submission form are also declared in your Financial Disclosure statement.

The authors have declared that no competing interests exist.

View published research articles from [PLOS ONE](#) for specific examples.

#### NO authors have competing interests

Enter: *The authors have declared that no competing interests exist.*

#### Authors with competing interests

Enter competing interest details beginning with this statement:

*I have read the journal's policy and the authors of this manuscript have the following competing interests: [insert competing interests here]*

\* typeset

#### Ethics Statement

Enter an ethics statement for this submission. This statement is required if the study involved:

- Human participants
- Human specimens or tissue
- Vertebrate animals or cephalopods
- Vertebrate embryos or tissues
- Field research

Write "N/A" if the submission does not require an ethics statement.

General guidance is provided below. Consult the [submission guidelines](#) for detailed instructions. **Make sure that all information entered here is included in the Methods section of the manuscript.**

The study was approved by the Institutional Committee for the Protection and Utilization of Animals of Jilin University(2023 No. 463).Rats were anesthetized with isoflurane inhalation anesthesia and euthanasia by CO2 inhalation.

**Format for specific study types**

**Human Subject Research (involving human participants and/or tissue)**

- Give the name of the institutional review board or ethics committee that approved the study
- Include the approval number and/or a statement indicating approval of this research
- Indicate the form of consent obtained (written/oral) or the reason that consent was not obtained (e.g. the data were analyzed anonymously)

**Animal Research (involving vertebrate animals, embryos or tissues)**

- Provide the name of the Institutional Animal Care and Use Committee (IACUC) or other relevant ethics board that reviewed the study protocol, and indicate whether they approved this research or granted a formal waiver of ethical approval
- Include an approval number if one was obtained
- If the study involved *non-human primates*, add *additional details* about animal welfare and steps taken to ameliorate suffering
- If anesthesia, euthanasia, or any kind of animal sacrifice is part of the study, include briefly which substances and/or methods were applied

**Field Research**

Include the following details if this study involves the collection of plant, animal, or other materials from a natural setting:

- Field permit number
- Name of the institution or relevant body that granted permission

**Data Availability**

Authors are required to make all data underlying the findings described fully available, without restriction, and from the time of publication. PLOS allows rare exceptions to address legal and ethical concerns. See the [PLOS Data Policy](#) and [FAQ](#) for detailed information.

Yes - all data are fully available without restriction

A Data Availability Statement describing where the data can be found is required at submission. Your answers to this question constitute the Data Availability Statement and **will be published in the article**, if accepted.

**Important:** Stating 'data available on request from the author' is not sufficient. If your data are only available upon request, select 'No' for the first question and explain your exceptional situation in the text box.

Do the authors confirm that all data underlying the findings described in their manuscript are fully available without restriction?

**Describe where the data may be found in full sentences. If you are copying our sample text, replace any instances of XXX with the appropriate details.**

- If the data are **held or will be held in a public repository**, include URLs, accession numbers or DOIs. If this information will only be available after acceptance, indicate this by ticking the box below. For example: *All XXX files are available from the XXX database (accession number(s) XXX, XXX).*
- If the data are all contained **within the manuscript and/or Supporting Information files**, enter the following: *All relevant data are within the manuscript and its Supporting Information files.*
- If neither of these applies but you are able to provide **details of access elsewhere**, with or without limitations, please do so. For example:

*Data cannot be shared publicly because of [XXX]. Data are available from the XXX Institutional Data Access / Ethics Committee (contact via XXX) for researchers who meet the criteria for access to confidential data.*

*The data underlying the results presented in the study are available from (include the name of the third party*

All relevant data are within the manuscript and its Supporting Information files.

*and contact information or URL).*

- This text is appropriate if the data are owned by a third party and authors do not have permission to share the data.

\* typeset

Additional data availability information:

1 AP39 ameliorates doxorubicin-induced cardiotoxicity by regulating  
2 the AMPK/UCP2 pathway

3 First author:Bin Zhang

4 Corresponding author:Bin Liu

5 Authors:Bin Zhang<sup>a</sup>,Yangxue Li<sup>a</sup>,Ning Liu<sup>a</sup>,Bin Liu<sup>a,\*</sup>

6 <sup>a</sup> The Second Hospital of Jilin University,Changchun, Jilin,130000, China.

7 \*Corresponding author at:No. 4026 Yatai Street, Nanguan District, Changchun City, Jilin Province,  
8 China.The Second Hospital of Jilin University.E-mail address:liubin3333@vip.sina.com

9

10 **Abstract**

11 Doxorubicin (DOX) is a broad-spectrum, highly effective antitumor agent,  
12 however, its cardiotoxicity has greatly limited its use.Hydrogen sulfide (H<sub>2</sub>S) is  
13 an endogenous gaseous transmitter that exerts cardioprotective effects via the  
14 regulation of oxidative stress and apoptosis and maintenance of mitochondrial  
15 function, among other mechanisms.AP39 is a novel mitochondria-targeted  
16 H<sub>2</sub>S donor that, at appropriate concentrations, attenuates intracellular  
17 oxidative stress damage, maintains mitochondrial function, and ameliorates  
18 cardiomyocyte injury.In this study, DOX-induced cardiotoxicity models were  
19 established with H9c2 cells and Sprague–Dawley rats to evaluate the  
20 protective effect of AP39 and its mechanisms of action.Both in vivo and in vitro  
21 experiments showed that DOX induces oxidative stress injury, apoptosis, and  
22 mitochondrial damage in cardiomyocytes and decreases the expression of  
23 p-AMPK/AMPK and UCP2.All DOX-induced changes were attenuated by  
24 AP39 treatment. Furthermore,the protective effect of AP39 was significantly



25 attenuated by the inhibition of AMPK and UCP2. The results suggest that  
26 AP39 ameliorates DOX-induced cardiotoxicity by regulating the expression of  
27 AMPK/UCP2.

28

29 Key words:AP39,Doxorubicin,Cardiotoxicity,AMPK,UCP2

30

## 31 1 Introduction

32 Doxorubicin (DOX), a broad-spectrum anthracycline antineoplastic drug,  
33 is widely used for the treatment of leukemia, breast cancer, ovarian cancer,  
34 lymphoma, and osteosarcoma (1).However, its severe dose-dependent  
35 cardiotoxicity (2)affects the quality of life of patients with cancer and can even  
36 shorten life expectancy.There is evidence that DOX exerts cardiotoxicity via  
37 oxidative stress, apoptosis, inflammation, and fibrosis.Furthermore,due to its  
38 cationic nature,DOX readily binds to mitochondrial intramembraneous  
39 membranes and forms an irreversible complex with cardiac phospholipid  
40 proteins, leading to cardiotoxicity by inducing mitochondrial damage in  
41 cardiomyocytes (3, 4).The only drug currently approved by the FDA for the  
42 treatment of DOX cardiotoxicity is dexrazoxane, which still has various side  
43 effects, including myelotoxicity in patients with soft-tissue sarcoma (5).  
44 Therefore, there is an urgent need to identify safe and effective drugs to  
45 improve DOX cardiotoxicity.

46 DOX-induced cardiotoxicity is related to adenosine

47 monophosphate-activated protein kinase (AMPK) (6). AMPK is an important  
48 regulator of cellular energy homeostasis and mitochondrial homeostasis. The  
49 activation of AMPK modulates cellular metabolism, autophagy, apoptosis, and  
50 fibrosis (7). Uncoupling protein 2 (UCP2) is located within the inner  
51 mitochondrial membrane and affects mitochondrial function and metabolism  
52 through oxidative phosphorylation uncoupling. AMPK attenuates oxidative  
53 stress damage, reduces apoptosis (8), attenuates mitochondrial damage (9),  
54 and attenuates inflammatory responses (10) by upregulating UCP2.

55 Hydrogen sulfide (H<sub>2</sub>S), a gaseous signaling molecule, exerts a potent  
56 protective effect on the cardiovascular system by regulating oxidative stress,  
57 apoptosis, autophagy, inflammation, mitochondrial function,  
58 neovascularization, and fibrosis at reasonable concentrations and has been  
59 shown to function via AMPK(11, 12).AP39 is a novel mitochondria-targeted  
60 H<sub>2</sub>S donor that attenuates intracellular oxidative stress at appropriate  
61 concentrations while maintaining cell viability, mitochondrial respiration, and  
62 mitochondrial DNA integrity (13, 14).AP39 prevents myocardial  
63 ischemia-reperfusion injury independently of the cytoplasmic RISK pathway  
64 (15),it also inhibits mitochondrial autophagy, antagonizes cardiomyocyte iron  
65 death, and ameliorates myocardial fibrosis in rats with myocardial infarction via  
66 the PINK1/Parkin pathway (16).

67 Based on its effects on oxidative stress, apoptosis, and mitochondrial  
68 processes, we hypothesized that the exogenous H<sub>2</sub>S donor AP39 may

69 attenuate DOX-induced cardiotoxicity. The aim of this study was to assess  
70 whether AP39 exerts a protective effect against DOX-induced cardiotoxicity  
71 and to investigate its mechanism of action, including its effects on the  
72 mitochondrial pathway and AMPK/UCP2.

73

## 74 2. Materials and methods

### 75 2.1 Reagents and antibodies

76 DOX (S1208) was purchased from Selleck (Houston, TX, USA),  
77 AP39(HY-126124) was purchased from MCE , Compound C(CC; 171260) and  
78 genipin (G4796) were purchased from Sigma–Aldrich (St. Louis, MO,  
79 USA). Primary antibodies for the following proteins were purchased from Cell  
80 Signaling Technology (Danvers, MA, USA): Caspase-3(9662, 1:1000), Cleaved  
81 Caspase-3 (9664, 1:1000), AMPK $\alpha$  (5831, 1:1000), p-AMPK $\alpha$  (Thr172) (50081,  
82 1:1000), UCP2 (89326, 1:1000). Primary antibodies for Bax(A0207, 1:1000)  
83 and Bcl-2 (A19693, 1:1000) were purchased from ABclonal. Small interfering  
84 RNA against UCP2 (siUCP2) and its negative control (NC) were synthesized  
85 by IBSBIO. Lipofectamine 2000 was purchased from Invitrogen(Waltham, MA,  
86 USA). Annexin V-FITC and SYTOX Red were purchased from Thermo Fisher  
87 Scientific(Waltham, MA, USA). The Cell Counting Kit-8(CCK-8) and BCA  
88 Protein Assay Kit were purchased from Bioss.  
89 Additionally, 2',7'-dichlorofluorescein diacetate (DCFH-DA) was purchased  
90 from Bestbio. The Mitochondrial Membrane Potential Assay Kit with JC-1 and

91 H2S Content Assay Kit were purchased from Solarbio (Beijing, China).The  
92 ATP assay kit was purchased from Nanjing Jiancheng Bioengineering  
93 Institute.The Superoxide Dismutase (SOD) Activity Assay Kit,Glutathione  
94 Peroxidase (GPX) Activity Assay Kit,Malondialdehyde (MDA) Content Assay  
95 Kit,Coenzyme II NADP (H) Content Assay Kit, and Lactate Dehydrogenase  
96 (LDH) Activity Assay Kit were all purchased from Beijing Boxbio Science &  
97 Technology Co., Ltd. (Beijing, China). The Rat Troponin T Type 2, Cardiac  
98 (TNNT2) ELISA Kit, Rat Creatine Kinase MB Isoenzyme (CKMB) ELISA Kit,  
99 and Rat Brain Natriuretic Peptide (BNP) ELISA Kit were all purchased from  
100 Jianglai Biology (Shanghai, China).

## 101 2.2 Animals and treatment

102 The study was conducted according to the guidelines of the Declaration of  
103 Helsinki, and approved by the Institutional Committee for the Protection and  
104 Utilization of Animals of Jilin University(2023 No. 463).

105 Male 8 to 10-week-old SPF Sprague–Dawley rats, weighing 300–320 g,  
106 were purchased from Yeast Laboratory Animal Technology.The rats were  
107 housed at the Animal Center of Jilin University, with the room temperature  
108 controlled at  $21 \pm 1^{\circ}\text{C}$ , humidity controlled at 50-60%, 12h day/night cycle, free  
109 access to water and food, and acclimatization for 1 week. They were then  
110 randomly assigned to groups (10 rats per group) and administered treatments  
111 according to different protocols.The specific dosing regimens were as follows:  
112 (1) Con (equal amounts of 0.9% NaCl + DMSO); (2) DOX(5mg/kg once a

113 week,ip, cumulative dose 15mg/kg); (3) AP39(50nmol/kg every other day,ip);  
114 (4) DOX + AP39; (5) DOX + AP39 + CC(20mg/kg/d for 1 week,ip); (6) DOX +  
115 AP39 + Genipin(20mg/kg/d for 3 days,ip).The above doses were based on  
116 previous study reports (17,18,19,20) and experimental data.

117 Weighing was performed every 3 days during the experiment, and the rats'  
118 mental status, activity status, and any pain or discomfort were also paid  
119 attention to and recorded. The duration of this experiment was 21 days, and no  
120 rats died before euthanasia. 21 days later, cardiac ultrasound was performed  
121 after isoflurane anesthesia was given, and then euthanasia was given by CO<sub>2</sub>  
122 inhalation method (a total of 60 rats). The above experiments were supervised  
123 and directed by the Institutional Committee for the Protection and Utilization of  
124 Animals of Jilin University.

### 125 2.3 Cell culture and treatments

126 The rat H9c2 cell line was purchased from Beijing Zhongke QC  
127 Biotechnology Co. (Beijing, China). DMEM supplemented with 10% fetal  
128 bovine serum and 1% penicillin and streptomycin was used for cell culture in  
129 an incubator at 37°C and a CO<sub>2</sub> concentration of 5%.Different drugs were  
130 given to stimulate the cells for 24h according to the experimental protocol  
131 including DOX (1 μmol/L), AP39 (100 nmol/L), and CC (10 μmol/L) (21). To  
132 reduce UCP2 expression in vitro, cells were transfected with siUCP2 (50  
133 nmol/L) using the transfection reagent Lipofectamine2000 for 48h, and the  
134 effectiveness of transfection was evaluated by qPCR and western blotting.

## 135 2.4 Cell activity assay

136 H9c2 cells were inoculated in 96-well plates ( $4 \times 10^3$ /well) and incubated  
137 with different concentrations of DOX (0, 0.5, 1, and 2  $\mu\text{mol/L}$ ) and AP39 (0, 30,  
138 50, 100, 300, and 500  $\text{nmol/L}$ ), with a final volume of 100 $\mu\text{L}$  in each well. After  
139 24 h, 10  $\mu\text{L}$  of CCK-8 reagent was added to each well, the cells were incubated  
140 in the cell incubator for 60 min, and absorbance was measured at 450 nm.

## 141 2.5 Detection of ROS

142 H9c2 cells were inoculated in 6-well plates ( $5 \times 10^4$ /well), and different  
143 stimuli were applied when cells reached approximately 70% confluence. Cells  
144 were incubated for 24h in a cell culture incubator. The DCFH-DA probe was  
145 diluted with serum-free DMEM at a ratio of 1:1000 and added to the 6-well  
146 plates at 1 mL/well, followed by incubation 37°C in the dark for 20 min. Cells  
147 were washed gently with phosphate-buffered saline and images were obtained  
148 under a fluorescence microscope. The average fluorescence intensity was  
149 evaluated using ImageJ.

## 150 2.6 Flow cytometry

151 H9c2 cells were resuspended under different conditions and diluted with  
152 1 $\times$  Binding Buffer to a concentration of  $1 \times 10^6$  cells/mL. Then, 100  $\mu\text{L}$  of the  
153 cell suspension was used for flow cytometry; briefly, 5  $\mu\text{L}$  of Annexin V-FITC  
154 and 5  $\mu\text{L}$  of SYTOX Red were added, samples were incubated at room  
155 temperature (25°C) in the dark for 15 min, 400  $\mu\text{L}$  of 1 $\times$  Binding Buffer was  
156 added, and samples were assayed immediately using the flow

157 cytometer(Cytoflex,Beckman).

## 158 2.7 Western blotting

159 Total protein was extracted from cell samples and cardiac tissues using  
160 RIPA buffer, and the protein concentration was determined using a BCA Kit.  
161 Equal concentrations of protein samples were separated by 10% SDS-PAGE  
162 and then transferred to PVDF membranes, which were blocked with 5% skim  
163 milk powder at room temperature for 60 min. The primary antibody was  
164 incubated overnight at 4°C, followed by incubation with the secondary antibody  
165 at room temperature for 1 h. Chemiluminescent color development was  
166 performed by adding the developing solution.

## 167 2.8 Mitochondrial membrane potential assay

168 Mitochondrial membrane potential was assayed using the JC-1 probe  
169 according to the manufacturer's instructions. When the mitochondrial  
170 membrane potential was high, JC-1 aggregated in the mitochondrial matrix  
171 and formed a polymer, producing red fluorescence; when the mitochondrial  
172 membrane potential was low, JC-1 did not aggregate in the mitochondrial  
173 matrix, and the monomers produced green fluorescence. Images were  
174 obtained using a fluorescence microscope, and the fluorescence intensity was  
175 analyzed using ImageJ. The ratio of red to green fluorescence was used to  
176 measure the change in mitochondrial membrane potential.

## 177 2.9 Quantitative real-time PCR

178 Total RNA was extracted with TransZol, and reverse transcription and

179 qRT-PCR were performed according to the instructions provided with the  
180 relevant kits. *GAPDH* was selected as the internal reference gene, and the  
181 relative expression was calculated by the  $2^{-\Delta\Delta CT}$  method.

## 182 2.10 Oxidative stress and ATP assays

183 According to the manufacturer's instructions, oxidative stress levels were  
184 measured using SOD, GSH-Px, MDA and NADPH kits, and cellular ATP levels  
185 were measured using ATP kits. Absorbance values were measured at different  
186 wavelengths using an enzyme meter and analyzed according to the standard  
187 curves and corresponding formulas.

## 188 2.11 ELISA

189 Cardiomyocyte injury was assessed using ELISA kits for TNNT2, CK-MB,  
190 and BNP in rat serum according to the manufacturer's instructions.

## 191 2.12 Transmission electron microscopy

192 Different groups of rat myocardial specimens and different drug-stimulated  
193 H9c2 cells were fixed with 2.5% glutaraldehyde phosphate and stained with 1%  
194 phosphotungstic acid. The mitochondrial ultrastructure was observed and  
195 analyzed by using a JEM-1400 microscope at a magnification of 5000x, 8000x,  
196 and 25000x.

## 197 2.13 HE and Masson staining

198 Rat myocardial tissues were fixed with 4% paraformaldehyde, embedded  
199 in paraffin, and cut into 3- $\mu$ m-thick wax slices. The sections were stained with  
200 hematoxylin and eosin (HE), Masson Lichtenstein acidic reagent, and toluidine



201 blue and observed under a light microscope.

## 202 2.14 Statistical analyses

203 All statistical analyses were performed using GraphPad Prism 9.0. Datas  
204 are expressed as the mean  $\pm$  standard deviation (SD). Comparisons between  
205 two groups were performed using Student's *t*-test, comparisons among  
206 multiple groups were performed using one-way ANOVA and post hoc Tukey's  
207 tests. Values of  $p < 0.05$  were statistically significant . All data used in  
208 statistical analyses were obtained from three or more independent repeated  
209 experiments.

210

## 211 3 Results

### 212 3.1 DOX induces H9c2 cell damage

213 H9c2 cells were stimulated with various concentrations of DOX (0, 0.5, 1,  
214 or 2  $\mu\text{mol/L}$ ) for 24 h for CCK-8 detection. Exposure to 1  $\mu\text{mol/L}$  DOX for 24 h  
215 decreased H9c2 cell viability by approximately 50% (compared with that in the  
216 control group), and the DOX-induced decrease in cell viability was  
217 dose-dependent. We stimulated H9c2 cells with 1  $\mu\text{mol/L}$  DOX for different  
218 durations (0, 6, 12, 24, and 48 h). A CCK-8 assay showed that cell viability  
219 decreased by about 50% at 24 h. Therefore, we stimulated H9c2 cells with 1  
220  $\mu\text{mol/L}$  DOX for 24 h for subsequent experiments (Fig. 1 A, B).

221 Free radical production is the main cause of cardiomyocyte damage by  
222 DOX, and cardiotoxicity occurs progressively with ROS production and lipid

223 peroxidation (22). As determined using the DCFH-DA probe, DOX increased  
224 ROS levels in cardiomyocytes (Fig. 1 C), resulting in decreased SOD and  
225 GSH-Px activity and increased MDA and NADPH levels (Fig. 1 D), suggesting  
226 that DOX causes oxidative stress injury in cardiomyocytes. Flow cytometry  
227 revealed that the apoptosis rate was significantly higher ( $p < 0.01$ ) in the DOX  
228 group than in the Con group (Fig. 1 E), suggesting that DOX caused apoptosis  
229 in H9c2 cells.

230 *Figure 1. DOX induces H9c2 cell damage.*

231

### 232 3.2 DOX induces mitochondrial damage in H9c2 cells

233 Previous studies have shown that DOX can lead to cardiomyocyte  
234 apoptosis via endogenous pathways (23), particularly the mitochondrial  
235 pathway. Furthermore, DOX can lead to mitochondrial damage (4). In this  
236 study, DOX increased the expression levels of the apoptosis-related protein  
237 Bax, decreased expression levels of Bcl-2, and increased expression levels of  
238 Cleaved Caspase-3/Caspase-3 (Fig. 2 A), indicating that DOX promotes  
239 apoptosis in cardiomyocytes and its mechanism of action involves  
240 mitochondria. We further evaluated mitochondrial membrane potential and  
241 ATP levels, revealing that DOX could lead to a decrease in mitochondrial  
242 membrane potential and ATP levels in cardiomyocytes (Fig. 2 B, C), while  
243 mitochondrial damage (mitochondrial structural disorganization, fragmentation,  
244 and cristae rupture) was observed by transmission electron microscopy (Fig. 2

245 D).

246 We performed AMPK and UCP2 assays. Western blotting showed that  
247 DOX resulted in decreased levels of p-AMPK/AMPK and UCP2 in  
248 cardiomyocytes (Fig. 2 E), suggesting that the damage to cardiomyocytes  
249 caused by DOX may be related to AMPK/UCP2.

250 *Figure2.DOX induces mitochondrial damage in H9c2 cells.*

251

### 252 3.3 AP39 ameliorates DOX-induced myocardial injury

253 AP39 has a concentration-dependent effect on mitochondrial activity. At  
254 low concentrations (30–100 nmol/L), AP39 stimulates mitochondrial electron  
255 transport and cellular bioenergetic functions, and at high concentrations (300  
256 nmol/L), it has an inhibitory effect on mitochondrial activity (14). Therefore, we  
257 first stimulated H9c2 cells with different concentrations of AP39 (0, 30, 50, 100,  
258 300, and 500 nmol/L) for 24 h and performed CCK-8 assays. The results were  
259 in accordance with those of previous reports indicating that AP39 at lower  
260 concentrations (30–100 nmol/L) does not significantly reduce cell viability. A  
261 decrease in cell viability was detected at 300 nmol/L, and a significant  
262 decrease in cell viability was detected at 500 nmol/L. Subsequently, we  
263 co-stimulated H9c2 cells with 1  $\mu$ mol/L DOX and different concentrations of  
264 AP39 for 24 h. The CCK-8 results showed that the improvement of cell viability  
265 was statistically significant at AP39 concentrations of 50 nmol/L and 100  
266 nmol/L, and the improvement was particularly obvious at an AP39

267 concentration of 100 nmol/L. In summary, we chose 100 nmol/L AP39 for  
268 subsequent experiments (Fig. 3 A–C).

269 We measured the intracellular H<sub>2</sub>S content under different conditions,  
270 demonstrating that DOX stimulation decreases the H<sub>2</sub>S content in H9c2 cells,  
271 and this decrease was attenuated by the exogenous administration of AP39  
272 (Fig. 3 D). In addition, AP39 significantly ameliorated DOX-induced oxidative  
273 stress injury in H9c2 cells, with a significant decrease in intracellular ROS  
274 levels (Fig. 3 E), improvements in SOD and GSH-Px activity, and decreases in  
275 MDA and NADPH levels after co-treatment with AP39 compared with  
276 corresponding levels in the DOX group (Fig. 3 F). AP39 ameliorated  
277 DOX-induced cardiomyocyte apoptosis, which was significantly lower in the  
278 DOX+AP39 group than in the DOX group (Fig. 3 G).

279 *Figure 3. AP39 ameliorates DOX-induced myocardial injury.*

280

### 281 3.4 AP39 ameliorates DOX-induced mitochondrial damage

282 We further investigated the mechanisms by which AP39 exerted protective  
283 effects against DOX-induced myocardial injury. Western blotting showed that  
284 AP39 decreased the expression of the apoptosis-related proteins Bax and  
285 Cleaved Caspase-3/Caspase-3 and increased the expression of Bcl-2 (Fig. 4  
286 A). Additionally, AP39 attenuated the DOX-induced decrease in mitochondrial  
287 membrane potential and ATP levels in cardiomyocytes (Fig. 4 B, C).

288 Transmission electron microscopy revealed that mitochondrial damage (i.e.,

289 the disorganization of mitochondrial structure, fragmentation, and cristae  
290 breakage) was attenuated by AP39 (Fig. 4 D).

291 As determined by western blotting, cardiomyocyte p-AMPK/AMPK and  
292 UCP2 levels were elevated after co-treatment with AP39 and DOX than after  
293 DOX stimulation alone (Fig.4 E), suggesting that the beneficial effect of AP39  
294 on DOX cardiotoxicity may be related to AMPK/UCP2.

295 *Figure4.AP39 ameliorates DOX-induced mitochondrial damage.*

296

297 3.5 Inhibition of AMPK expression limits the beneficial effect of AP39 on DOX  
298 cardiotoxicity

299 To verify whether the beneficial effect of AP39 on DOX cardiotoxicity was  
300 related to AMPK, we inhibited AMPK using the AMPK inhibitor Compound C  
301 (CC) and demonstrated the effectiveness of CC by western blotting (Fig. 5 A).  
302 As determined by a CCK-8 assay, CC did not influence cell viability (Fig. 5 B).  
303 ROS levels were significantly higher in the DOX+AP39+CC group than in the  
304 DOX+AP39 group (Fig. 5 C). SOD and GSH-Px activities were lower and MDA  
305 and NADPH levels were higher in the DOX+AP39+CC group than in the  
306 DOX+AP39 group (Fig. 5 D), suggesting that the inhibition of AMPK  
307 expression limited the beneficial effect of AP39 on DOX-induced oxidative  
308 stress injury in cardiomyocytes. The apoptosis rate was higher in the  
309 DOX+AP39+CC group than in the DOX+AP39 group (Fig. 5 E). Western  
310 blotting showed that the expression levels of Bax and Cleaved

311 Caspase-3/Caspase-3 were higher and expression levels of Bcl-2 were lower  
312 in DOX+AP39+CC group than in the DOX+AP39 group (Fig. 5 F), suggesting  
313 that the inhibition of AMPK limited the effect of AP39 on DOX-induced  
314 apoptosis in cardiomyocytes. Furthermore, the beneficial effects of AP39 on  
315 both mitochondrial membrane potential and ATP levels in cardiomyocytes  
316 were weakened by the inhibition of AMPK expression (Fig. 5 G, H). These  
317 results suggest that AP39 ameliorates DOX-induced cardiotoxicity by  
318 regulating AMPK expression.

319 We further evaluated the regulatory relationship between AMPK and  
320 UCP2. Although the down-regulation of UCP2 by DOX was improved by  
321 co-treatment with AP39, the expression level of UCP2 in the DOX+AP39+CC  
322 group was still significantly lower than that in the DOX+AP39 group (Fig. 5 I),  
323 indicating that the inhibition of AMPK expression suppressed the up-regulation  
324 of UCP2 by AP39. These findings suggest that UCP2 may function  
325 downstream of AMPK in the regulation of DOX cardiotoxicity by AP39.

326 *Figure 5. Inhibition of AMPK expression limits the beneficial effect of AP39 on DOX*  
327 *cardiotoxicity.*

328

329 3.6 AP39 improves DOX-induced cardiotoxicity by preventing the  
330 down-regulation of UCP2

331 To clarify whether the beneficial effect of AP39 on DOX cardiotoxicity was  
332 achieved by modulating the expression of UCP2, we inhibited the expression

333 of UCP2 using small interfering RNA and confirmed the effectiveness of  
334 transfection by qPCR and western blotting (Fig. 6 A). CCK-8 results showed  
335 that cell viability did not differ significantly in the NC and siUCP2 groups  
336 compared with Con group(Fig. 6 B). Oxidative stress damage, apoptosis, and  
337 mitochondrial damage were not significantly improved in the  
338 DOX+AP39+siUCP2 group compared with those in the DOX+AP39 group. In  
339 particular, ROS levels were high (Fig. 6 C), SOD and GSH-Px levels were low,  
340 and MDA and NADPH levels were high (Fig. 6 D). The apoptosis rate  
341 remained high, and western blotting showed that Bax and Cleaved  
342 Caspase-3/Caspase-3 levels were high and Bcl-2 levels were low (Fig. 6 E, F).  
343 Mitochondrial membrane potential and ATP levels remained low (Fig. 6 G, H).  
344 The above results suggested that the inhibition of UCP2 inhibited the beneficial  
345 effect of AP39 on DOX cardiotoxicity, suggesting that UCP2 mediates the  
346 effects of AP39.

347 We hypothesized that UCP2 acts downstream of AMPK. To verify this, we  
348 further evaluated the levels of p-AMPK/AMPK. DOX decreased the expression  
349 of p-AMPK/AMPK. AP39 upregulated p-AMPK/AMPK, and the inhibition of  
350 UCP2 did not influence the effect of AP39 (Fig. 6 I). We have previously  
351 confirmed that the inhibition of AMPK could affect the expression of UCP2.  
352 These findings further demonstrated that UCP2 functions downstream of  
353 AMPK.

354 Collectively, these findings demonstrated that AP39 ameliorates

355 DOX-induced oxidative stress damage, apoptosis, and mitochondrial damage  
356 in H9c2 cells by regulating the expression of AMPK/UCP2.

357 *Figure 6. AP39 improves DOX-induced cardiotoxicity by preventing the*  
358 *down-regulation of UCP2.*

359

360 3.7 AP39 attenuates DOX-induced cardiotoxicity in rats by regulating the  
361 AMPK/UCP2 pathway

362 To further validate our experimental results, we conducted in vivo  
363 experiments with rats. DOX administration resulted in a significant decrease in  
364 body weight and an elevated heart/body weight ratio in rats over those in the  
365 control group (Fig. 7 A, B). Cardiac ultrasound showed a significant decrease  
366 in EF%, FS%, and E/A, suggesting that there was a significant decline in  
367 cardiac function (Fig. 7 C). The levels of TNNT2, CK-MB, LDH, and BNP were  
368 significantly increased in abdominal aorta blood after DOX administration (Fig.  
369 7 D), indicating obvious myocardial damage. HE staining of the rat  
370 myocardium was observed under an optical microscope; myocardial cells in  
371 the DOX group were deformed, broken, and dissolved, with edema, an  
372 enlarged myocardial interstitial space, unevenly colored myocardial fibers, and  
373 inflammatory cell infiltration. Masson staining showed a disrupted arrangement  
374 of cardiomyocytes, obvious increase in blue collagen fibers in the interstitium  
375 of the myocardium, and obvious myocardial fibrosis in the DOX group (Fig. 7  
376 E). Mitochondrial swelling, structural disorder, fragmentation, ridge breakage,



377 and vacuole-like degeneration of cardiomyocytes in the DOX group were  
378 observed by transmission electron microscopy (Fig. 7 F). We also tested  
379 indexes of serum oxidative stress in rats. SOD and GSH-Px activities were  
380 lower and MDA and NADPH levels were higher in the DOX group than in the  
381 control group (Fig. 7 G). Western blotting showed that DOX increased the  
382 expression of the apoptosis-related protein Bax, decreased the expression of  
383 Bcl-2, increased the expression of Cleaved Caspase-3/Caspase-3, and  
384 decreased expression levels of p-AMPK/AMPK and UCP2 (Fig. 7H). In the  
385 DOX+AP39 group, the toxic effects of DOX were ameliorated to varying  
386 degrees, consistent with the results of our in vitro experiments. We also  
387 confirmed the mechanism by which AP39 improves DOX cardiotoxicity in vivo  
388 by administering the AMPK inhibitor CC and UCP2 inhibitor  
389 genipin. Cardiomyocyte injury, oxidative stress injury, mitochondrial injury, and  
390 apoptosis, as described above, did not differ significantly in the  
391 DOX+AP39+CC and DOX+AP39+Genipin groups, also consistent with results  
392 of in vitro experiments. These findings suggest that the beneficial effect of  
393 AP39 on DOX-induced cardiotoxicity in rats is achieved by modulating  
394 AMPK/UCP2 expression.

395 *Figure 7. AP39 attenuates DOX-induced cardiotoxicity in rats by regulating the*  
396 *AMPK/UCP2 pathway.*

397

#### 398 4 Discussion

399 DOX is a broad-spectrum and highly effective antitumor drug commonly  
400 used in the treatment of different types of tumors. It can significantly improve  
401 the survival rate of patients with cancer. However, its severe cardiotoxicity  
402 greatly limits its application. Therefore, there is an urgent need to find drugs  
403 that can reduce the cardiotoxicity of DOX. In this study, both in vivo and in vitro  
404 experiments demonstrated that the exogenous mitochondria-targeted H<sub>2</sub>S  
405 donor AP39 could attenuate DOX-induced cardiotoxicity by ameliorating  
406 oxidative stress, apoptosis, and mitochondrial damage. Mechanistically, we  
407 found that AP39 exerts its protective effects by activating the expression of  
408 AMPK/UCP2, and inhibitors of AMPK and UCP2 can attenuate or even  
409 eliminate the beneficial effect of AP39. These results clearly indicate that AP39  
410 is promising for the prevention or treatment of DOX cardiotoxicity.

411 Increasing focus on DOX cardiotoxicity has led to extensive research.  
412 Studies have shown that DOX decreases levels of SOD, CAT, and GSH-Px  
413 and increases levels of MDA in the rat heart, and the amelioration of oxidative  
414 stress injury can ameliorate cardiotoxicity (24, 25), consistent with our findings.  
415 In our experiments, DOX induce ROS production in H9c2 cardiomyocytes,  
416 decreased SOD and GSH-Px activity in cardiomyocytes and rat serum, and  
417 increased MDA and NADPH levels, indicating that it induces oxidative stress in  
418 cardiomyocytes. DOX can induce cardiomyocyte apoptosis through both  
419 endogenous and exogenous pathways (23). For example, DOX can induce  
420 apoptosis and pyroptosis via the Akt/mTOR signaling pathway (26), heat shock

421 proteins (HSP-10, HSP-20, HSP-22, HSP-27, and HSP60), and lipocalin, and  
422 it is possible to reduce the cardiotoxicity of DOX by promoting antiapoptotic  
423 activity (27, 28), as demonstrated in our experiments. In particular, we found  
424 that DOX can significantly increase the apoptosis rate of H9c2 cells,  
425 up-regulate Bax and Cleaved Caspase-3/Caspase-3, and down-regulate Bcl-2,  
426 suggesting that DOX can induce endogenous apoptosis via the mitochondrial  
427 pathway. Compared with other cell types, cardiomyocytes have more  
428 mitochondria, and DOX mainly acts on cardiomyocyte mitochondria, interfering  
429 with mitochondrial electron transport and leading to the formation of  
430 superoxide (O<sub>2</sub><sup>-</sup>) free radicals (29). DOX induces mitochondrial DNA (mtDNA)  
431 mutations and defects along with elevated ROS in mitochondria, and these  
432 changes have been implicated in the development of cardiomyopathy (30).  
433 DOX can also induce excessive opening of mitochondrial permeability  
434 transition pore (31) and affect mitochondrial KATP channel activity (32), thus  
435 leading to myocardial injury. In our experiments, DOX decreased mitochondrial  
436 membrane potential and ATP levels in cardiomyocytes. Mitochondrial structure  
437 disorganization, fragmentation, and cristae rupture were observed. These in  
438 vivo and in vitro experiments clearly show that DOX causes the structural  
439 damage and dysfunction of mitochondria in cardiomyocytes.

440 Hydrogen sulfide (H<sub>2</sub>S), initially described as a toxic gas with a rotten egg  
441 odor, is similar in nature to nitric oxide (NO) and carbon monoxide (CO), an  
442 endogenous gaseous signaling molecule in mammals. Increasing studies have

443 shown that it is involved in a variety of pathophysiological processes, such as  
444 oxidative stress, inflammation, apoptosis, and angiogenesis; additionally, it  
445 plays a protective role in the pathogenesis and progression of cardiovascular  
446 diseases (33). H<sub>2</sub>S reduces lipid peroxidation by hydrogen peroxide and  
447 superoxide scavenging in a model of isoprenaline-induced myocardial injury  
448 (34). H<sub>2</sub>S-mediated activation of Nrf2-dependent pathways leads to the  
449 upregulation of genes involved in endogenous antioxidant defense (35). It  
450 protects mitochondrial function by inhibiting respiration, thereby limiting ROS  
451 production and reducing mitochondrial uncoupling (36). Furthermore, H<sub>2</sub>S  
452 significantly prevents high glucose-induced apoptosis in cardiomyocytes by  
453 modulating the expression of Bax and Bcl-2 (37). AP39, a novel  
454 mitochondria-targeted H<sub>2</sub>S donor, can ameliorate high-fat-diet-induced liver  
455 injury in young rats by attenuating oxidative stress and mitochondrial damage  
456 (38). It can support cellular bioenergetics and prevent Alzheimer's disease by  
457 maintaining mitochondrial function in APP/PS1 mice and neurons (18). It can  
458 prevent 6-hydroxydopamine-induced mitochondrial dysfunction (39). In this  
459 study, both in vivo and in vitro experiments confirmed that exogenous  
460 mitochondrial targeting of AP39 ameliorates DOX-induced oxidative stress by  
461 decreasing cardiomyocyte ROS levels, elevating SOD and GSH-Px contents,  
462 and decreasing MDA and NADPH levels; it improved cardiomyocyte apoptosis  
463 by regulating the expression of apoptosis-related proteins, such as Bax, Bcl-2,  
464 and Cleaved Caspase-3/ Caspase-3, and improved DOX-induced

465 mitochondrial injury by elevating mitochondrial membrane potential and ATP  
466 levels, consistent with results of previous studies on the mechanisms  
467 underlying the myocardial protective effects of H<sub>2</sub>S or AP39.

468 Cardiac tissues have high metabolic energy requirements, and growing  
469 evidence suggests that AMPK plays a key role as an energy sensor and a  
470 major regulator of metabolism in regulating cell survival in vivo and in vitro (40).  
471 In 2005, Tokarska-Schlattner et al. were the first to demonstrate that AMPK  
472 inactivation plays an important role in DOX cardiotoxicity (41). Since then,  
473 additional studies have shown that AMPK is closely related to multiple  
474 molecular mechanisms underlying DOX-induced cardiomyocyte injury. DOX is  
475 able to inhibit the expression and phosphorylation of AMPK proteins in the rat  
476 heart via DNA damage-induced Akt signaling, which activates a negative  
477 feedback loop of mTOR signaling and leads to cardiac remodeling (42). DOX  
478 can lead to myocardial fibrosis and cardiomyocyte apoptosis in APN-SE mice  
479 by inhibiting AMPK expression (43). Some AMPK activators, such as  
480 metformin, statins, resveratrol, and thiazolidinediones, have the potential to  
481 prevent DOX cardiotoxicity (44). Located within the mitochondrial membrane,  
482 UCP2 acts as an anion carrier and regulates the transmembrane proton  
483 electrochemical gradient in many human tissues; it is involved in a number of  
484 processes, including mitochondrial membrane potential, ROS production  
485 within the mitochondrial membrane, and calcium homeostasis (45). UCP2 is  
486 involved in the reduction of ROS production and mitochondrial ROS

487 scavenging (46) and can protect cardiomyocytes from oxidative stress by  
488 inhibiting ROS production (47). UCP2 prevents neuronal apoptosis and  
489 attenuates brain dysfunction after stroke and traumatic brain injury (48). UCP2  
490 protects the heart from I/R injury by inducing mitochondrial autophagy (49).  
491 Studies on the interaction between AMPK and UCP2 have yielded conflicting  
492 results. It has been suggested that UCP2 affects the autophagic process in  
493 septic cardiomyopathy via AMPK signaling (50) and regulates  
494 cholangiocarcinoma cell plasticity via mitochondrial-AMPK signaling (51).  
495 However, there is substantial evidence that AMPK functions upstream of UCP2.  
496 For example, in a model of nonalcoholic fatty liver disease, LB100 regulated  
497 UCP2 expression by inhibiting AMPK (21). Malvidin alleviates mitochondrial  
498 dysfunction and ROS accumulation by activating the AMPK- $\alpha$ /UCP2 axis,  
499 thereby preventing inflammation and apoptosis in SAE mice (10). Indole  
500 sulfate induces oxidative stress and hypertrophy in cardiomyocytes by  
501 inhibiting the AMPK/UCP2 signaling pathway (52). In our experiments, we  
502 found that the protective effect of AP39 against DOX cardiotoxicity was  
503 mediated by AMPK/UCP2, and the use of AMPK inhibitors affected the  
504 expression of UCP2, while the inhibition of UCP2 expression did not have a  
505 significant effect on the expression level of AMPK. These findings suggest that  
506 AMPK is an upstream signal of UCP2 and regulates the expression of UCP2.  
507 The differences in the regulatory relationship between AMPK and UCP2  
508 among studies may be related to differences in disease models, stimuli, and

509 other factors. The present study clarifies the role of the AMPK regulation of  
510 UCP2 in the attenuation of DOX cardiotoxicity by AP39; however, the specific  
511 mechanism underlying these regulatory effects is not clear. A downstream  
512 pathway of AMPK is Sirt1/PGC-1 $\alpha$ , and AMPK activates the NAD<sup>+</sup>-dependent  
513 type III deacetylase Sirt1 by increasing the intracellular NAD<sup>+</sup>/NADH ratio;  
514 Sirt1 activation leads to peroxisome proliferation-activated receptor- $\gamma$   
515 coactivator 1 $\alpha$  (PGC-1 $\alpha$ ) deacetylation and activity regulation, and  
516 Sirt1/PGC-1 $\alpha$  may be involved in the regulation of UCP2 (8). Accordingly, the  
517 roles of Sirt1/PGC-1 $\alpha$  need to be studied further. Despite these limitations, our  
518 experimental results provide possible therapeutic strategies for DOX  
519 cardiotoxicity and support the beneficial effects of AP39.

520

## 521 5 Conclusions

522 Taken together, our findings suggest that AP39 ameliorates DOX  
523 cardiotoxicity by attenuating oxidative stress, apoptosis, and mitochondrial  
524 damage via the modulation of AMPK/UCP2 expression. These findings  
525 indicate that AP39 is a promising new therapeutic agent for preventing  
526 DOX-induced cardiotoxicity.

## 527 CRediT authorship contribution statement

528 Bin Zhang: Conceptualization, Methodology, Validation, Formal analysis, Writing  
529 - Original Draft; Yangxue Li: Formal analysis, Writing - Review & Editing; Ning Liu:  
530 Resources, Writing - Review & Editing, Project administration; Bin Liu\*:

531 Resources,Supervision,Project administration,Funding acquisition.

## 532 Declaration of Competing Interest

533 The authors declare no competing interests.

534

## 535 Funding sources

536 This work was supported by Jilin Province Science and Technology

537 Department (20220303002SF), Jilin Provincial Development and Reform

538 Commission (2022C003), Jilin Province Science and Technology Department

539 (20190905002SF).

540



541     **【References】**

- 542     1、 Sun J, Wei Q, Zhou Y, Wang JQ, Liu Q, Xu H. A systematic analysis of  
543     FDA-approved anticancer drugs. *BMC Syst Biol* 2017; 11: 87. doi:10.1186/  
544     s12918 -017-0464-7.
- 545     2、 Omland T, Heck SL, Gulati G. The role of cardioprotection in cancer therapy  
546     cardiotoxicity: JACC: cardiooncology state-of-the-art review. *JACC*  
547     *CardioOncol* 2022;4:19 – 37. doi:10.1016/j.jaccao. 2022.01.101.
- 548     3、 Rawat PS, Jaiswal A, Khurana A. Doxorubicin-induced cardiotoxicity: An  
549     update on the molecular mechanism and novel therapeutic strategies for  
550     effective management. *Biomedicine & Pharmacotherapy* 2021 Jul;139:111708.  
551     doi:10.1016/j.biopha.2021.111708.
- 552     4、 Jones IC, Dass CR. Doxorubicin-induced cardiotoxicity: causative factors  
553     and possible interventions. *Journal of Pharmacy and Pharmacology*, 2022, 74,  
554     1677 – 1688. doi:10.1093/jpp/rgac063.
- 555     5、 Ceruso MS, Napolitano A, Silletta  
556     M, Mazzocca A, Valeri S, Improta L, Santini D, Tonini G, Badalamenti G, Vinc  
557     enzi B. Use of Cardioprotective Dexrazoxane Is Associated with Increased  
558     Myelotoxicity in Anthracycline- Treated Soft-Tissue Sarcoma Patients.  
559     *Chemotherapy* 2019; 64: 105 – 9. doi:10.1159/000501195.
- 560     6、 Timm KN, Tyler DJ, The Role of AMPK Activation for Cardioprotection in  
561     Doxorubicin-Induced Cardiotoxicity. *Cardiovascular Drugs and Therapy* (2020)  
562     34:255 – 269. do:10.1007/s10557-020-06941-x.

563 7、 Kim J, Kundu M, Viollet B, Guan KL, AMPK and mTOR regulate autophagy  
564 through direct phosphorylation of Ulk1. *Nat Cell Biol.* 2011 Feb; 13(2): 132 –  
565 141. doi: 10.1038/ncb2152.

566 8、 Huang J, Liu W, Doycheva DM, Gamdzyk M, Lu WT, Tang JP, Zhang  
567 JH. Ghrelin attenuates oxidative stress and neuronal apoptosis via  
568 GHSR-1 $\alpha$ /AMPK/Sirt1/PGC-1 $\alpha$ /UCP2 pathway in a rat model of neonatal  
569 HIE. *Free Radic Biol Med.* 2019 Sep;141:322-337. doi:  
570 10.1016/j.freeradbiomed.2019.07.001.

571 9、 Liu D, Ma Z, Di SY, Yang Y, Yang JG, Xu LQ, Reiter RJ, Qiao SB, Yuan  
572 JS. AMPK/PGC1 $\alpha$  activation by melatonin attenuates acute doxorubicin  
573 cardiotoxicity via alleviating mitochondrial oxidative damage and  
574 apoptosis. *Free Radic Biol Med.* 2018 Dec;129:59-72. doi:10.1016/  
575 j.freeradbiomed. 2018.08.032.

576 10、 Zhao PP, Li XM, Yang QK, Lu YZ, Wang GL, Yang HT, Dong JQ, Zhang  
577 HG. Malvidin alleviates mitochondrial dysfunction and ROS accumulation  
578 through activating AMPK- $\alpha$ /UCP2 axis, thereby resisting inflammation and  
579 apoptosis in SAE mice. *Front Pharmacol* 2023 Jan 9;13:1038802. doi:  
580 10.3389/fphar.2022.1038802. eCollection 2022.

581 11、 S. R. Lee, B. Nilius, and J. Han, “Gaseous signaling molecules in  
582 cardiovascular function: from mechanisms to clinical translation,” *Reviews*  
583 *of Physiology, Biochemistry and Pharmacology*, 2018;174:81-156.  
584 doi:10.1007/112\_2017\_7.

585 12、 Wang YZ,Ngowi EE,Wang D,Qi  
586 HW,Jing MR, Zhang YX, Cai CB, He QL, Khattak S, Khan NH, Jiang QY, Ji X  
587 Y, Wu DD . The Potential of Hydrogen Sulfide Donors in Treating  
588 Cardiovascular Diseases.Int. J. Mol. Sci. 2021, 22,  
589 2194.doi:10.3390/ijms22042194.

590 13、 Karwi QG,Bornbaum J,Boengler K,  
591 Torregrossa R, Whiteman M, Wood ME, Schulz R, Baxter GF .AP39, a  
592 mitochondria-targeting hydrogen sulfide (H<sub>2</sub> S) donor, protects against  
593 myocardial reperfusion injury independently of salvage kinase signalling[J].Br  
594 J Pharmacol,2017, 174(4):287-301.doi:10.1111/bph.13688. Epub 2017 Jan 24.

595 14、 Szczesny B, Módos1K, Yanagi K, Coletta C,Trionnaire SL, Wood ME,  
596 Whiteman M, Szabo C. AP39[10-oxo-10-(4-(3-thioxo-3H-1,2-dithiol-5yl)  
597 phenoxy)decyl) triphenylphosphonium bromide], a mitochondrially targeted  
598 hydrogen sulfide donor, stimulates cellular bioenergetics, exerts cytoprotective  
599 effects and protects against the loss of mitochondrial DNA integrity in  
600 oxidatively stressed endothelial cells in vitro.Nitric Oxide. 2014 September 15;  
601 41: 120 – 130. doi:10.1016/j.niox.2014.04.008.

602 15、  
603 Karwi QG, Bornbaum J, Boengler K, Torregrossa R, Whiteman M, Wood M  
604 E, Schulz R, Baxter GF.AP39, a mitochondria-targeting hydrogen sulfide (H<sub>2</sub> S)  
605 donor, protects against myocardial reperfusion injury independently of salvage  
606 kinase signalling.Br J Pharmacol . 2017 Feb;174(4):287-301. doi: 10.1111/bph.

607 13688. Epub 2017 Jan 24.

608 16、 Yang T, Yang Q, Lai Q, Zhao JX, Nie LG, Liu SQ, Yang J, Chu C. AP39  
609 inhibits ferroptosis by inhibiting mitochondrial autophagy through the  
610 PINK1/parkin pathway to improve myocardial fibrosis with myocardial  
611 infarction. *Biomed Pharmacother.* 2023 Sep;165:115195. doi:  
612 10.1016/j.biopha.2023. 115195. Epub 2023 Jul 27.

613 17、 Ding M, Shi R, Fu F , Li M, De D, Du YY, Li ZF. Paeonol protects against  
614 doxorubicin-induced cardiotoxicity by promoting Mfn2-mediated mitochondrial  
615 fusion through activating the PKC $\epsilon$ -Stat3 pathway. *J Adv Res.* 2023 May; 47:  
616 151 – 162. doi: 10.1016/j.jare.2022.07.002.

617 18、 Zhao FL, Fang F, Qiao PF, Yan N, Gao D, Yan Y. AP39, a  
618 Mitochondria-Targeted Hydrogen Sulfide Donor, Supports Cellular  
619 Bioenergetics and Protects against Alzheimer's Disease by Preserving  
620 Mitochondrial Function in APP/PS1 Mice and Neurons. *Oxid Med Cell  
621 Longev.* 2016; 2016: 8360738. doi: 10.1155 /2016/8360738.

622 19、 Yan WJ, Zhang HF, Liu PL, Wang H, Liu JY, Gao C, Liu Y, Lian K, Yang  
623 L, Sun L, et al. Impaired mitochondrial biogenesis due to dysfunctional  
624 adiponectin-AMPK-PGC-1 $\alpha$  signaling contributing to increased  
625 vulnerability in diabetic heart. *Basic Res. Cardiol.* 108 (3) (2013) 329. doi:  
626 10.1007/s00395-013-0329-1.

627 20、 Nam KN, Choi YS, Jung HJ, Park GH, Park JM, Moon SK , Cho  
628 KH, Kang C, Kang I, Oh MS, Lee EH. Genipin inhibits the inflammatory

629 response of rat brain microglial cells. *Int Immunopharmacol.* 2010  
630 Apr;10(4):493-9. doi: 0.1016 /j.intimp .2010.01.011. Epub 2010 Feb 1.

631 21、Chen XY, Cai CZ, Yu ML, Feng ZM, Zhang YW, Liu PH, Zeng H, Yu  
632 CH.LB100 ameliorates nonalcoholic fatty liver disease via the AMPK/ Sirt1  
633 pathway. *World J. Gastroenterol.* 25 (45), 6607–6618. doi:10.3748/wjg.v25.  
634 i45.6607.

635 22、M.S. Horenstein, R.S. Vander Heide, T.J. L’ Ecuyer, Molecular basis of  
636 anthracycline-induced cardiotoxicity and its prevention, *Mol. Genet. Metab.* 71  
637 (1 – 2) (2000) 436 – 444. doi: 10.1006/mgme.2000.3043.

638 23、Ghigo A, Li N, Hirsch E, New signal transduction paradigms in  
639 anthracycline- induced cardiotoxicity, *Biochim. Biophys. Acta* 1863 (7 Pt B)  
640 (2016) 1916–1925. doi:10.1016/j.bbamcr.2016.01.021.

641 24、Fadillioglu, E, Oztas, E, Erdogan, H, Yagmurca M, Sogut S, Ucar  
642 M, Irmak MK. Protective effects of caffeic acid phenethyl ester on  
643 doxorubicin-induced cardiotoxicity in rats. *Journal of Applied Toxicology: An*  
644 *International Journal*, 24, 47 – 52. doi: 10.1002/jat.945.

645 25、Alkreathy H, Damanhour Z A, Ahme N, Slevin M, Ali SS, Osman AM. Aged  
646 garlic extract protects against doxorubicin-induced cardiotoxicity in rats. *Food*  
647 *and Chemical Toxicology*, 48, 951 – 956. doi: 10.1016/j.fct.2010.01.005Get  
648 rights and content.

649 26、Yu W, Qin X, Zhang Y, Qiu P, Wang L, Zha WL, Ren J. Curcumin  
650 suppresses doxorubicin-induced cardiomyocyte pyroptosis via a

651 PI3K/Akt/mTOR- dependent manner. *Cardiovascular Diagnosis and Therapy*,  
652 10, 752–769. doi: 10.21037/cdt-19-707.

653 27、Shan YX, Liu TJ, Su HF, Samsamshariat A, Mestril R, Wang PH. Hsp10  
654 and Hsp60 modulate Bcl-2 family and mitochondria apoptosis signaling  
655 induced by doxorubicin in cardiac muscle cells. *Journal of Molecular and  
656 Cellular Cardiology*, 35, 1135–1143. doi: 10.1016/s0022-2828(03)00229-3.

657 28、Zhao D, Xue C, Li J, Feng K, Zeng P,  
658 Chen YL, Duan YJ, Zhang S, Li XJ, Han JH, Yang XX. Adiponectin agonist  
659 ADP355 ameliorates doxorubicin-induced cardiotoxicity by decreasing  
660 cardiomyocyte apoptosis and oxidative stress. *Biochemical and Biophysical  
661 Research Communications*, 533, 304–312. doi: 10.1016/j.bbrc.2020.09.035.

662 29、M. Schlame, D. Rua, M.L. Greenberg, The biosynthesis and functional role  
663 of cardiolipin, *Prog. Lipid Res.* 39 (3) (2000) 257–288. doi:10.1016/S0163-  
664 7827 (00) 00005-9.

665 30、Lebrecht D, Setzer B, Ketelsen UP, Haberstroh JR, Walker UA. Time-  
666 dependent and tissue-specific accumulation of mtDNA and respiratory chain  
667 defects in chronic doxorubicin cardiomyopathy. *Circulation*, 108, 2423–2429.  
668 doi:10.1161/01.CIR.0000093196.59829.DF.

669 31、Montaigne D, Marechal X, Baccouch R, Modine T, Preau S, Zannis  
670 K, Marchetti P, Lancel S, Neviere R. Stabilization of mitochondrial membrane  
671 potential prevents doxorubicin -induced cardiotoxicity in isolated rat heart.  
672 *Toxicology and Applied Pharmacology*, 244, 300–307. doi:10.1016

673 /j.taap.2010.01.006.

674 32、 Beak J, Huang W, Parker JS, Hicks ST, Patterson C,  
675 Simpson PC, Ma AQ, Jin J, Jensen BC. An oral selective alpha-1A adrenergic  
676 receptor agonist prevents doxorubicin cardiotoxicity. *JACC. Basic to*  
677 *translational science*, 2, 39–53. doi: 10.1016/j.jacbts. 2016. 10. 006.

678 33、 Wang R.Physiological implications of hydrogen sulfide: a whiff exploration  
679 that blossomed.*Physiol Rev*. 2012 Apr;92(2):791-896. doi: 10.1152/physrev.  
680 00017. 2011.

681 34、 Szabõ C. Hydrogen sulphide and its therapeutic potential. *Nature Reviews*  
682 *Drug Discovery*. 2007;6(11):917–935. doi: 10.1038/nrd2425.

683 35、 Calvert JW, Coetzee WA, Lefer DJ. Novel insights into hydrogen  
684 sulfide-mediated cytoprotection. *Antioxidants & Redox Signaling*.2010;12(10) :  
685 1203–1217. doi: 10.1089/ars.2009.2882.

686 36、 Elrod JW, Calvert JW, Morrison J, Doeller JE, Kraus DW, Tao L, Jiao  
687 XY, Scalia R, Kiss L, Szabo C,et al. Hydrogen sulfide attenuates myocardial  
688 ischemia-reperfusion injury by preservation of mitochondrial  
689 function. *Proceedings of the National Academy of Sciences of the United*  
690 *States of America*. 2007;104(39):15560–15565.doi: 10.1073/pnas.  
691 0705891104.

692 37、 Zhou X, Lu X. Hydrogen sulfide inhibits high-glucose-induced apoptosis in  
693 neonatal rat cardiomyocytes. *Experimental Biology and Medicine*. 2013;238(4):  
694 370–374. doi: 10.1177/1535370213477989.

695 38、 Yu Y, Ye SM, Liu DY and Yang LQ.AP39 ameliorates high fat diet-induced  
696 liver injury in young rats via alleviation of oxidative stress and mitochondrial  
697 impairment.Exp Anim. 2021; 70(4): 553 – 562.doi: 10.1538/expanim.21-0056.

698 39、 Marwah MK, Manhoosh B, Shokr H,  
699 Tahan MAA, Stewart R, Iqbal M, Sanchez LD, Abdullah S, Ahmad S, Wang K  
700 Q, Rana KS, Sanchez-Aranguren L.Transdermal delivery of  
701 mitochondrial-targeted hydrogen sulphide donor, AP39 protects against  
702 6-hydroxydopamine-induced mitochondrial dysfunction.Eur J Pharm  
703 Biopharm. 2023 Sep 4;S0939-6411(23)00237-0. doi: 10.1016/j.ejpb.  
704 2023.09.004.

705 40、 Ramamurthy S, Ronnett GV.Developing a head for energy sensing:  
706 AMP-activated protein kinase as a multifunctional metabolic sensor in the  
707 brain.J Physiol. 2006 Jul 1;574(Pt 1):85-93. doi: 10.1113/jphysiol.2006.110122.

708 41、 Tokarska-Schlattner M, Zaugg M, Da Silva R, Lucchinetti E,Schaub MC,  
709 Wallimann T, Schlattner U. Acute toxicity of doxorubicin on isolated perfused  
710 heart: Response of kinases regulating energy supply. Am J Physiol - Hear Circ  
711 Physiol. 2005;289.doi:10.1152/ajpheart.01057.2004.

712 42、 Gratia S, Kay L, Potenza L, Seffouh A, Novel-Chate V ,Schnebelen  
713 C, Sestili P, Schlattner U, Tokarska-Schlattner M. Inhibition of AMPK  
714 signalling by doxorubicin: At the crossroads of the cardiac responses to  
715 energetic, oxidative, and genotoxic stress. Cardiovasc Res. 2012;95:290 –  
716 9.doi: 10.1093/cvr/cvs134.



717 43、Konishi M, Haraguchi G, Ohigashi H, Ishihara T, Saito K, Nakano Y, Isobe  
718 M. Adiponectin protects against doxorubicin-induced cardiomyopathy by  
719 anti-apoptotic effects through AMPK up-regulation. *Cardiovasc Res.* 2011 Feb  
720 1;89(2):309-19. doi: 10.1093/cvr/cvq335. Epub 2010 Oct 25.

721 44、Timm KN, Tyler DJ. The Role of AMPK Activation for Cardioprotection in  
722 Doxorubicin-Induced Cardiotoxicity. *Cardiovascular Drugs and Therapy* (2020)  
723 34:255 – 269. doi:10.1007/s10557-020-06941-x.

724 45、Stanzione R, Forte M, Cotugno M, Bianchi F, Marchitti S, Busceti CL,  
725 Fornai F, Rubattu S. Uncoupling Protein 2 as a Pathogenic Determinant and  
726 Therapeutic Target in Cardiovascular and Metabolic Diseases. *Current*  
727 *Neuropharmacology*, 2022, 20, 662-674. doi:  
728 10.2174/1570159X19666210421094204.

729 46、Rubattu S, Stanzione R, Volpe M. Mitochondrial Dysfunction Contributes  
730 to Hypertensive Target Organ Damage: Lessons from an Animal Model of  
731 Human Disease. *Oxidative medicine and cellular longevity* 016;2016:1067801.  
732 doi: 10.1155/2016/1067801.

733 47、Teshima Y, Akao M, Jones SP, Marbán E. Uncoupling protein-2  
734 overexpression inhibits mitochondrial death pathway in cardiomyocytes. *Circ*  
735 *Res.* 2003 Aug 8;93(3):192-200. doi: 10.1161/01.RES.0000085581.60197.4D.

736 48、Mehta SL, Li PA. Neuroprotective role of mitochondrial uncoupling protein  
737 2 in cerebral stroke. *J Cereb Blood Flow Metab.* 2009 Jun;29(6):1069-78. doi:  
738 10.1038/jcbfm.2009.4.

739 49、Wu H,Ye M,Liu D,Yang J,  
740 Ding JW, Zhang J, Wang XA, Dong WS, Fan ZX, Yang J.UCP2 protect the  
741 heart from myocardial ischemia/reperfusion injury via induction of  
742 mitochondrial autophagy. J. Cell. Biochem., 2019, 120(9), 15455-15466. doi:  
743 10.1002/jcb.28812.

744 50、Mao JY, Su LX, Li DK, Zhang HM, Wang XT, Liu DW.The effects of UCP2  
745 on autophagy through the AMPK signaling pathway in septic cardiomyopathy  
746 and the underlying mechanism.Ann Transl Med 2021;9(3):259.doi:  
747 10.21037/atm-20-4819.

748 51、Yu JH,Shi L, Shen XG,Zhao YF.UCP2 regulates cholangiocarcinoma cell  
749 plasticity via mitochondria-to-AMPK signals.Biochem Pharmacol. 2019 Aug;  
750 166: 174 – 184.doi: 10.1016/j.bcp.2019.05.017.

751 52、Yang K, Xu XL, Nie L,  
752 Xiao TL, Guan X, He T, Yu YL, Liu L, Huang YJ, Zhang JB, Zhao JH.Indoxyl  
753 sulfate induces oxidative stress and hypertrophy in cardiomyocytes by  
754 inhibiting the AMPK/UCP2 signaling pathway.Toxicol Lett. 2015 Apr  
755 16;234(2):110-9. doi: 10.1016/j.toxlet. 2015.01.021. Epub 2015 Feb 19.

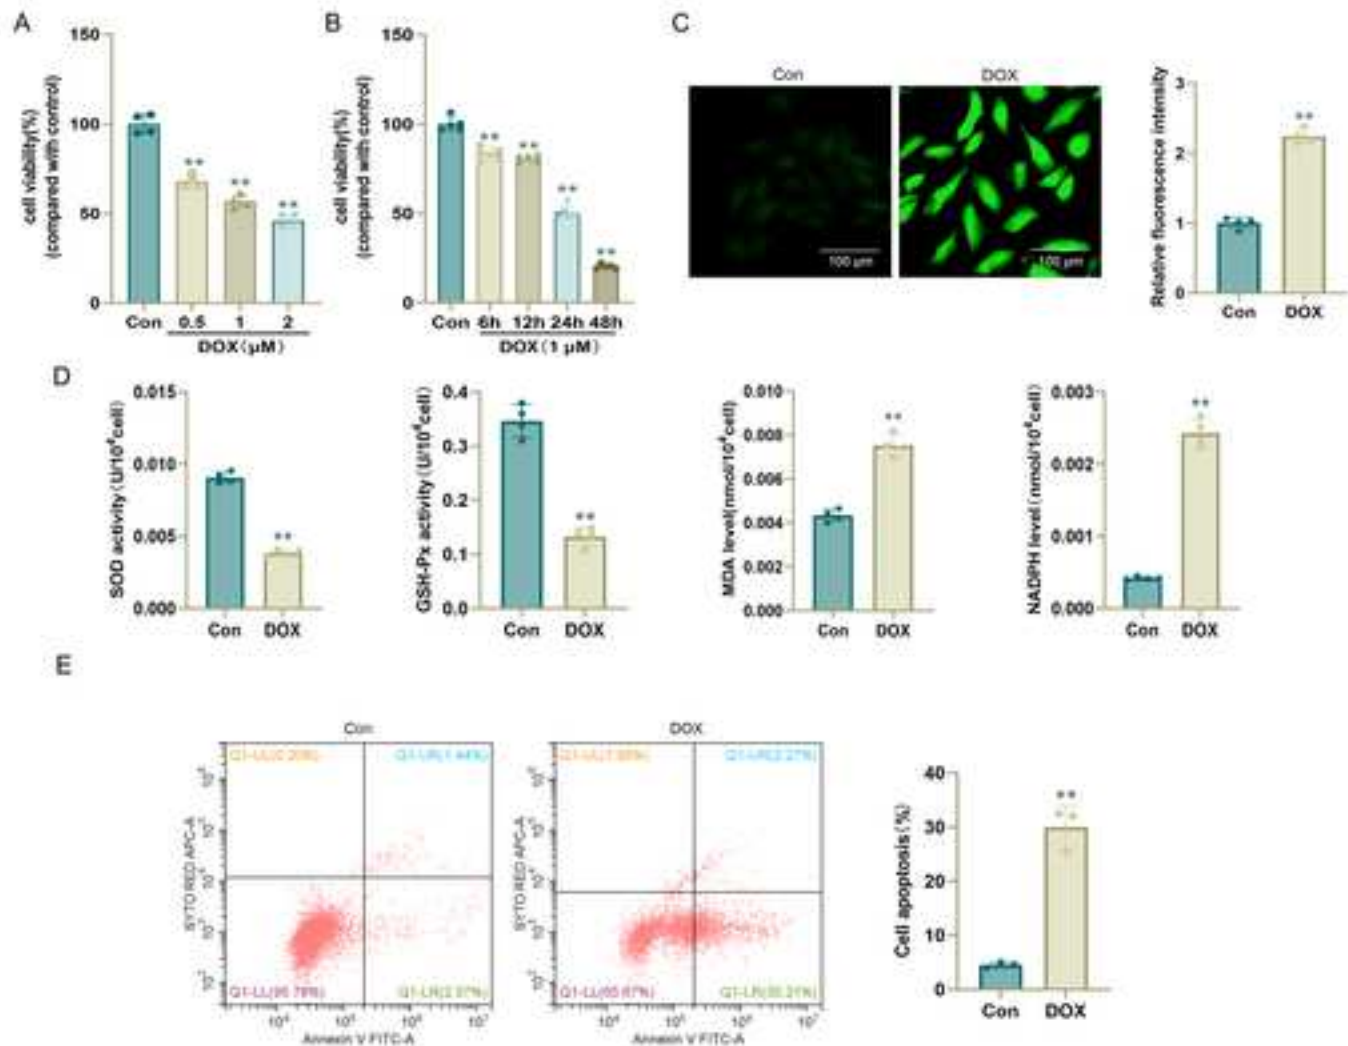

Figure 1 DOX induces H9c2 cell damage. (A) and (B) Cell viability determined by CCK-8 assays after treatment with DOX at different concentrations for 24 h and treatment with  $1 \mu\text{mol/L}$  DOX for different times ( $n = 4$  or  $5$ ); (C) Representative DCFH-DA images and statistical results ( $n = 4$ ); (D) SOD, GSH-Px, MDA, and NADPH levels in H9c2 cells ( $n = 4$ ); (E) Apoptosis rate measured by flow cytometry ( $n = 3$ ). Values represent the mean  $\pm$  SD. \* $p < 0.05$  vs. Con group, \*\* $p < 0.01$  vs. Con group.

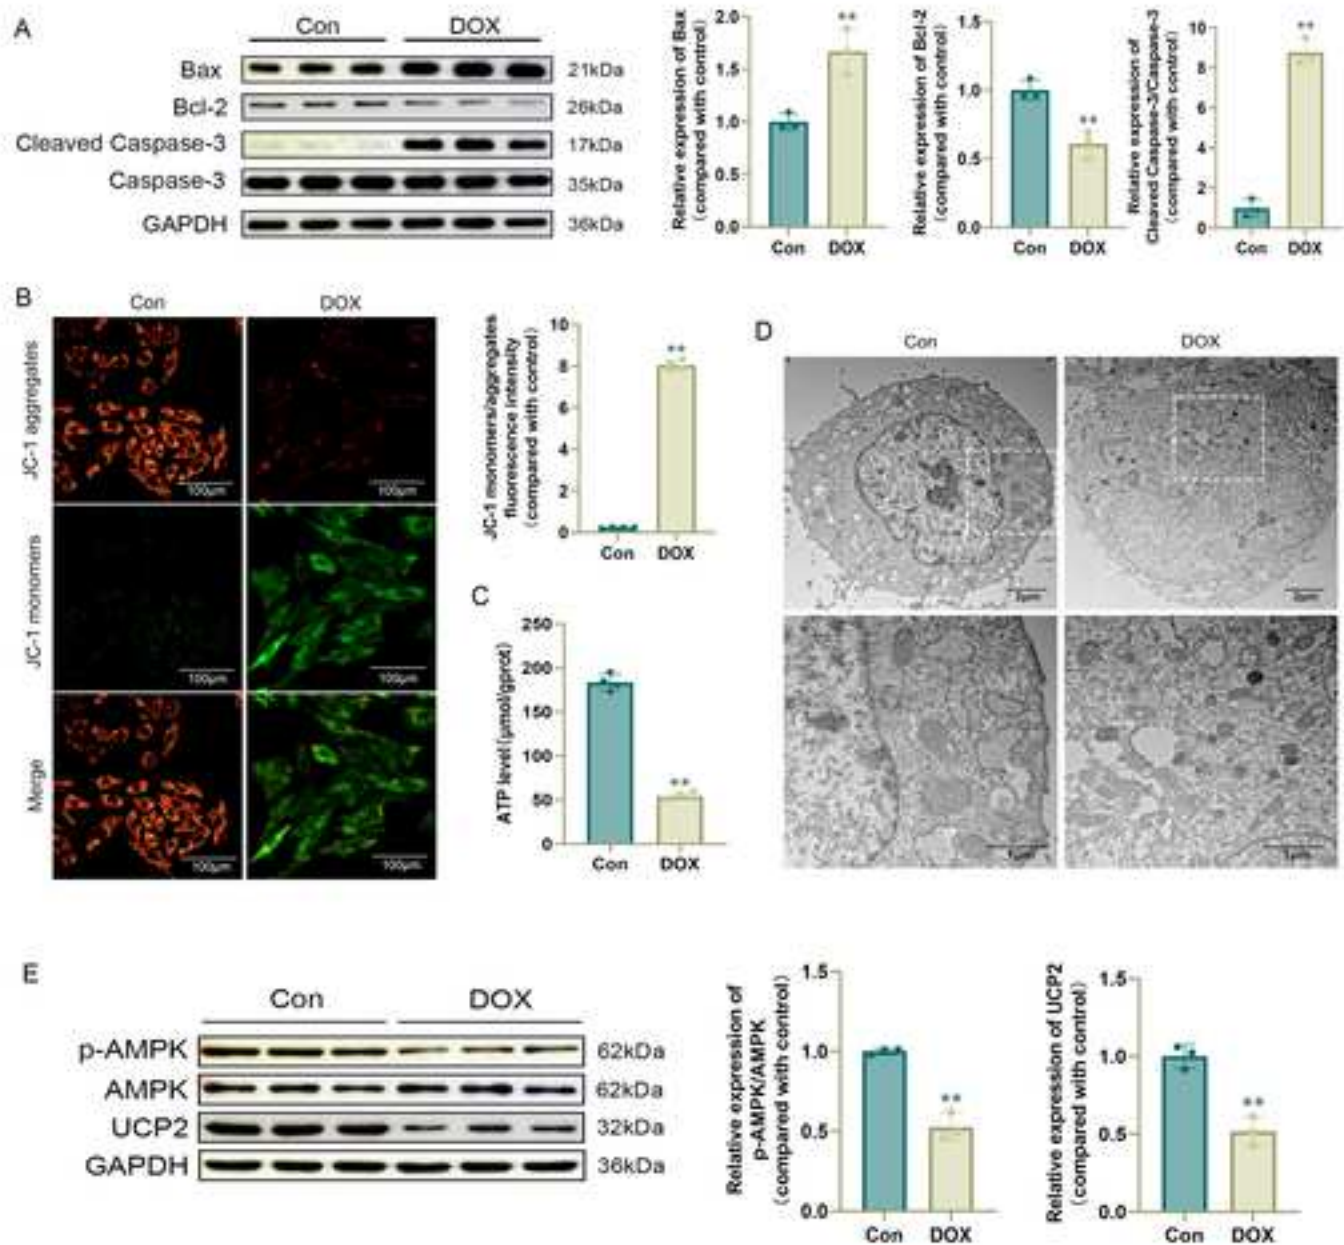

Figure 2 DOX induces mitochondrial damage in H9c2 cells. (A) Western blot detection of apoptosis-related protein levels and statistical results (n = 3); (B) Representative JC-1 images and quantification of fluorescence intensity for JC-1 monomers/aggregates (n = 4); (C) ATP level (n = 4); (D) Representative images of mitochondria in H9c2 cells observed by transmission electron microscopy; (E) Western blot detection of p-AMPK, AMPK, and UCP2 levels and statistical results (n = 3). Values are presented as the mean  $\pm$  SD. \*p < 0.05 vs. Con group, \*\*p < 0.01 vs. Con group.

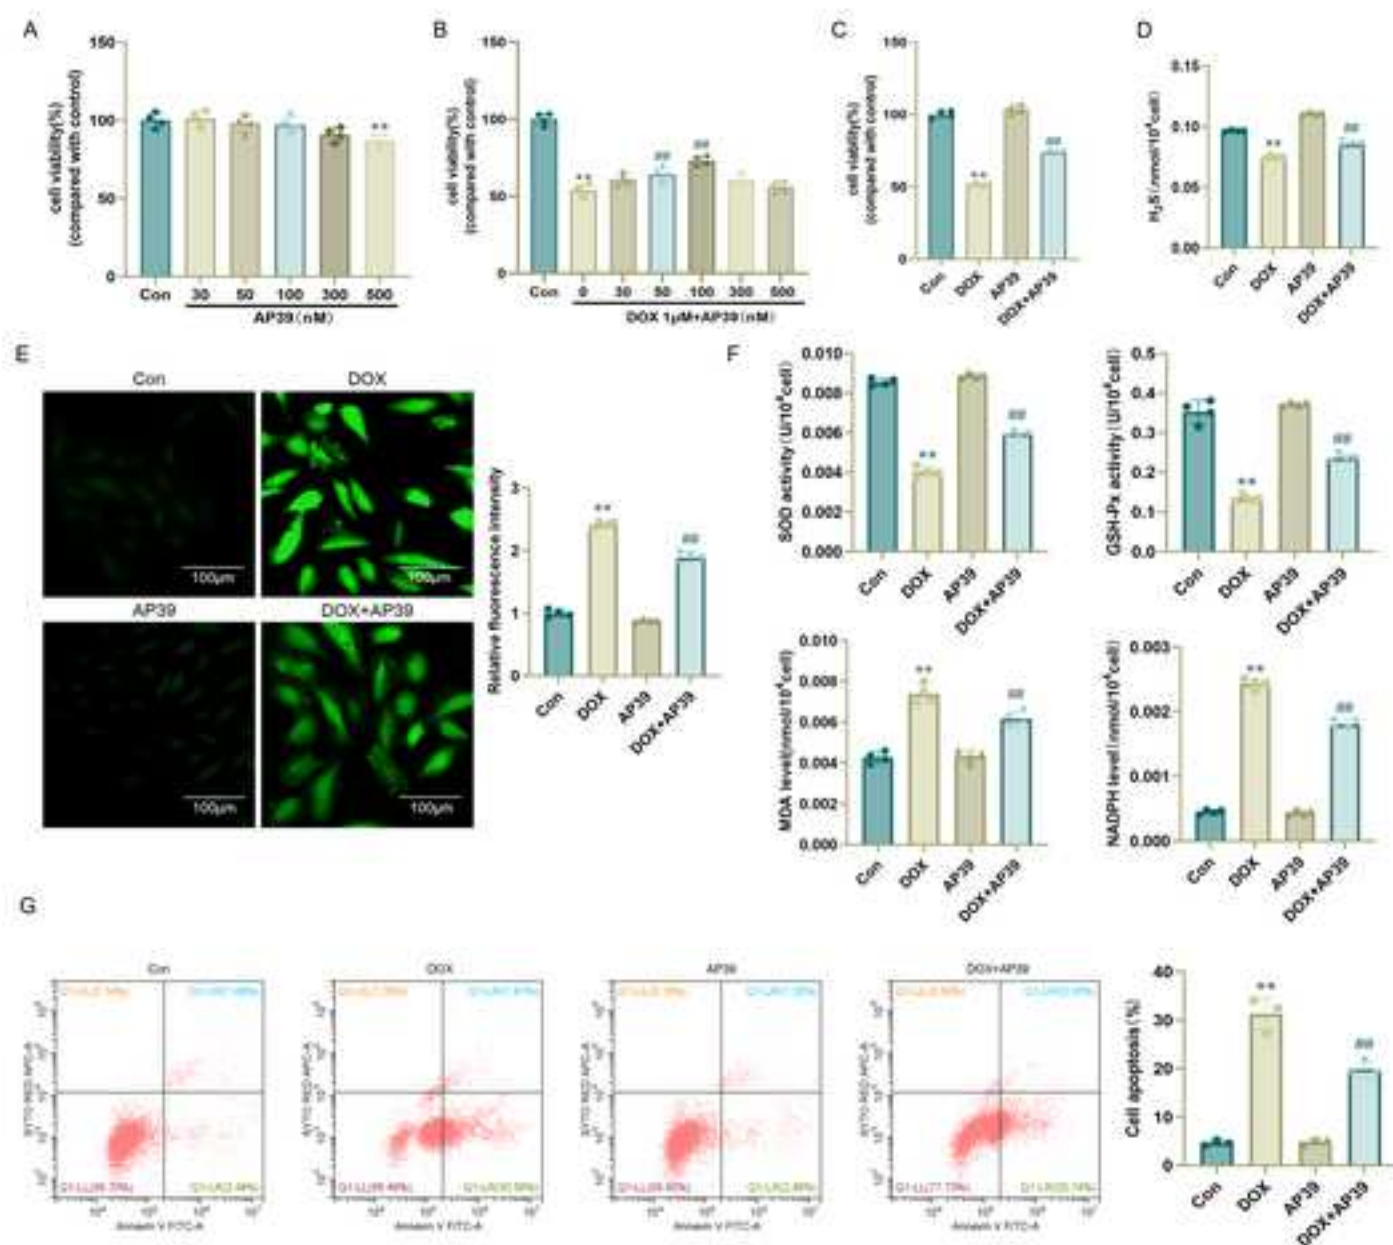

Figure 3 AP39 ameliorates DOX-induced myocardial injury. (A)-(C) Cell viability determined by CCK-8 assays after H9c2 cells were treated with different concentrations of AP39 for 24 h, 1 μmol/L DOX, and different concentrations of AP39 for 24 h (n = 4); (D) H<sub>2</sub>S contents (n = 4); (E) Representative DCFH-DA images and statistical results (n = 4); (F) SOD, GSH-Px, MDA, and NADPH levels in H9c2 cells (n = 4); (G) Apoptosis rate measured by flow cytometry (n = 3). Values are presented as the mean ± SD. \*p < 0.05 vs. Con group. \*\*p < 0.01 vs. Con group. #p < 0.05 vs. DOX group, ##p < 0.01 vs. DOX group.



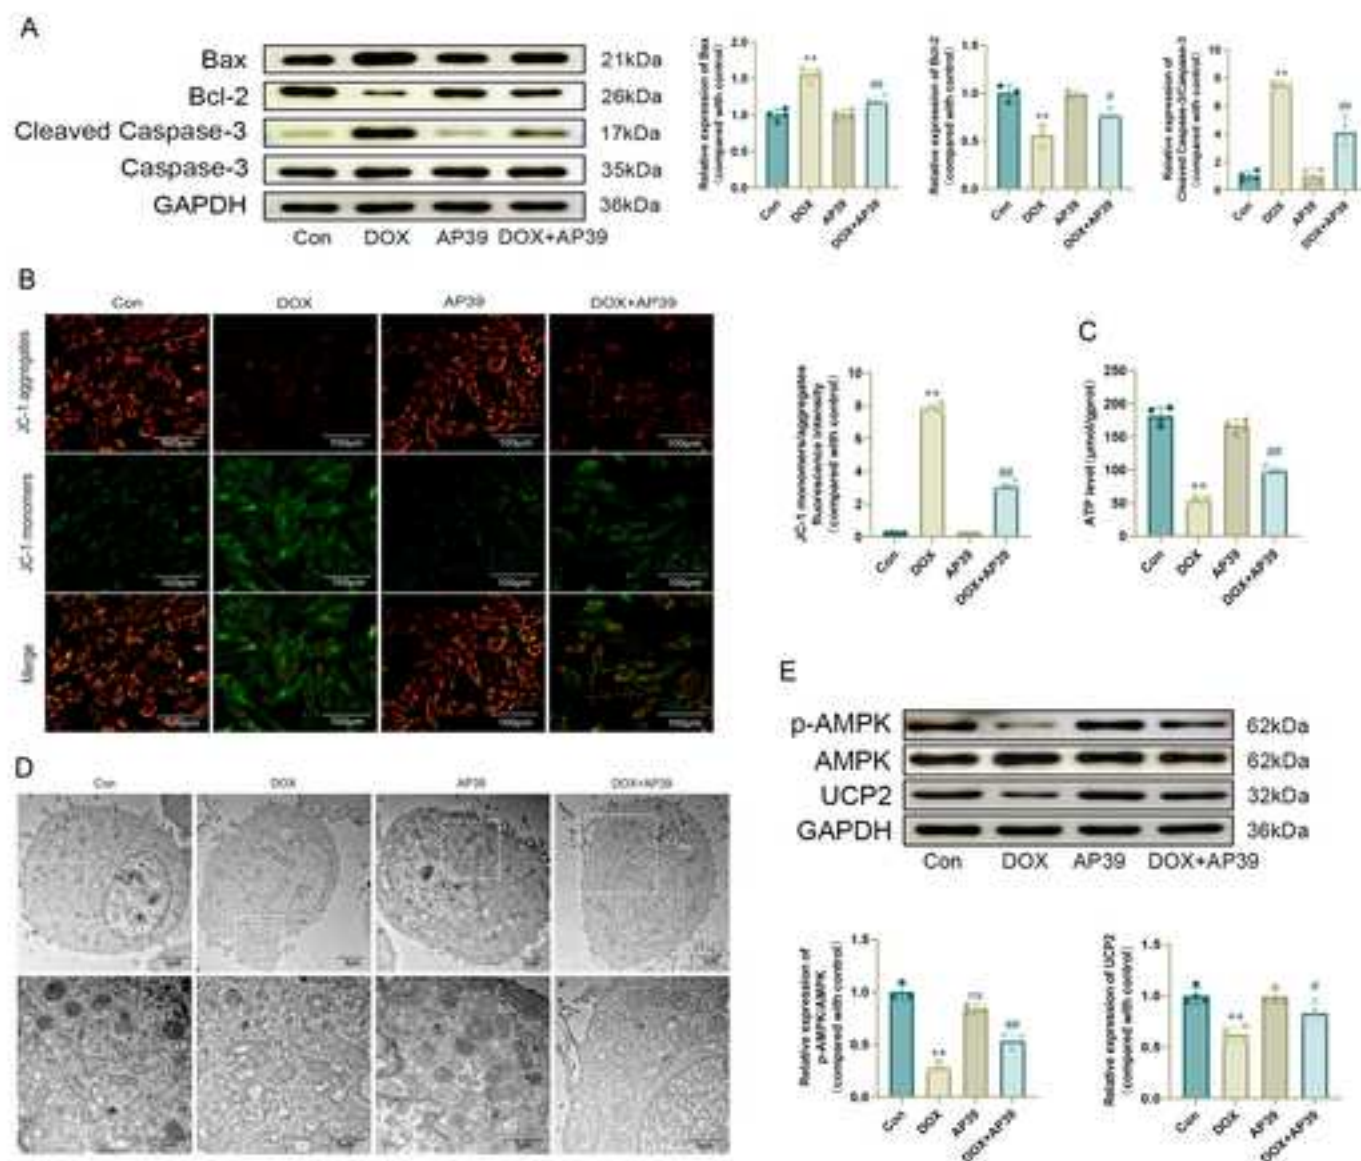

Figure 4 AP39 ameliorates DOX-induced mitochondrial damage. (A) Western blot detection of apoptosis-related protein levels and statistical results ( $n = 3$  or  $4$ ); (B) Representative JC-1 images and quantification of fluorescence intensity for JC-1 monomers/aggregates ( $n = 4$ ); (C) ATP level ( $n = 4$ ); (D) Representative images of mitochondria in H9c2 cells observed by transmission electron microscopy; (E) Western blot detection of p-AMPK, AMPK, and UCP2 levels and statistical results ( $n = 3$  or  $4$ ). Values are presented as the mean  $\pm$  SD. \* $p < 0.05$  vs. Con group, \*\* $p < 0.01$  vs. Con group. # $p < 0.05$  vs. DOX group, ## $p < 0.01$  vs. DOX group. NS indicates no significant difference vs. Con group.

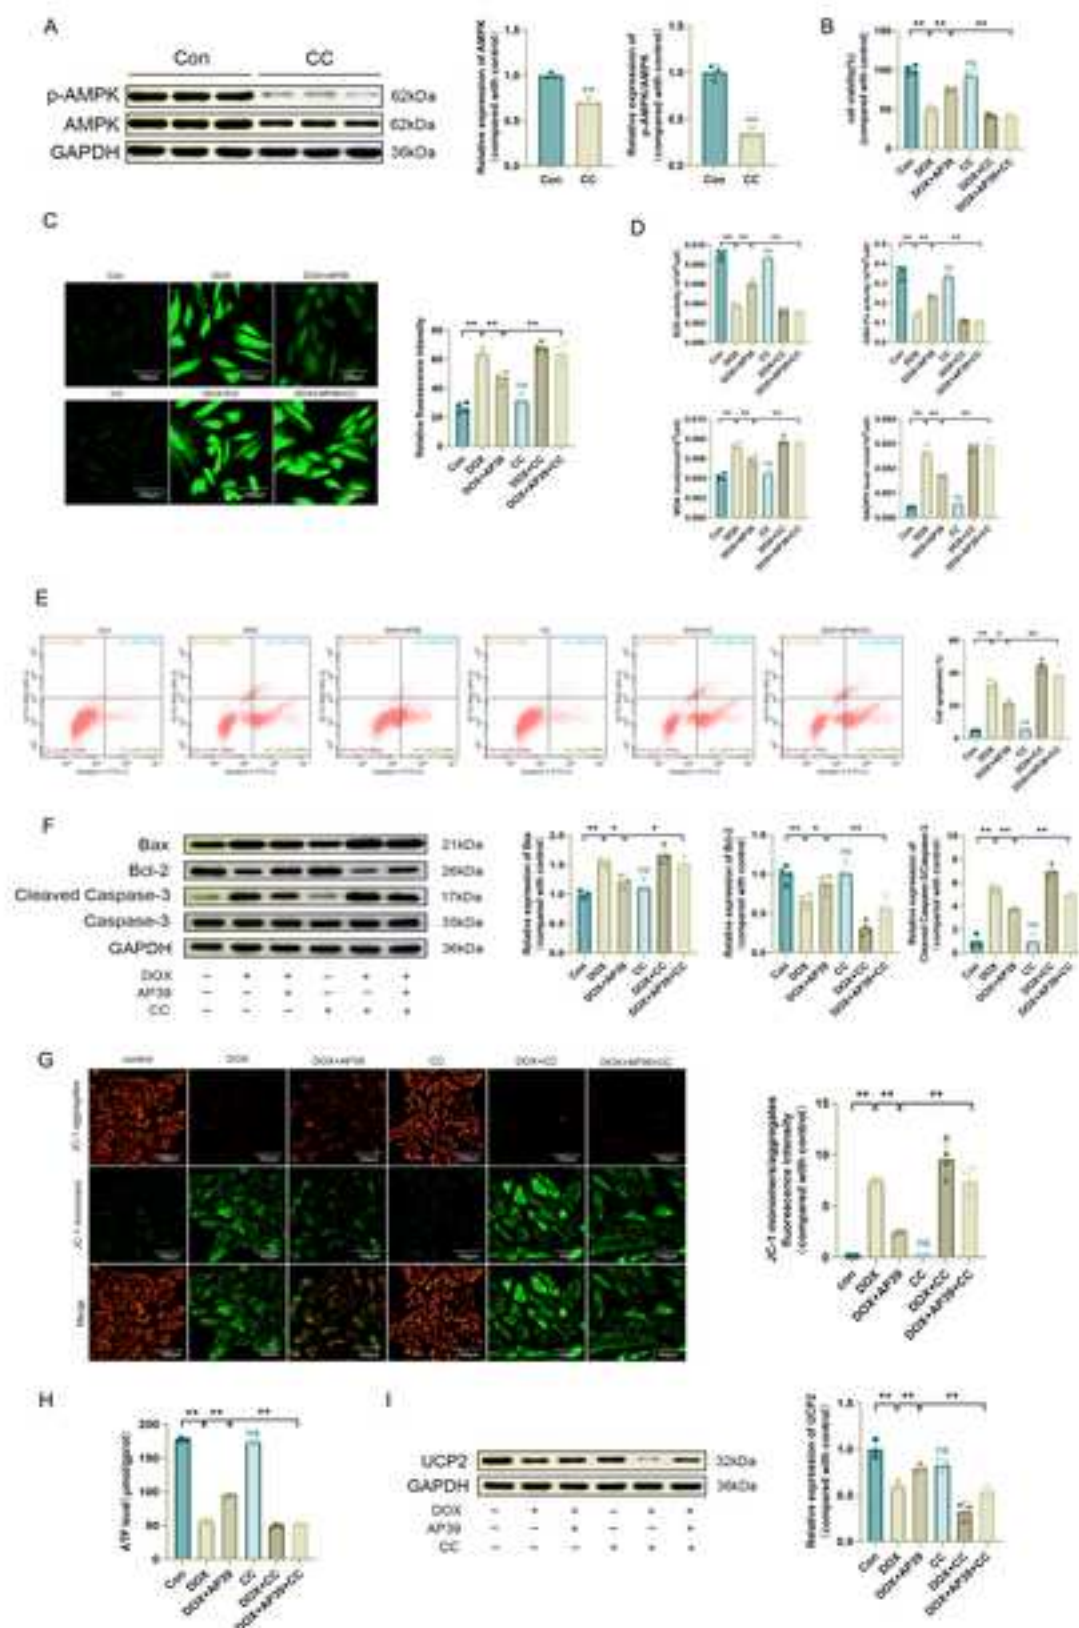

Figure 5 Inhibition of AMPK expression limits the beneficial effect of AP39 on DOX cardiotoxicity. (A) Western blot detection of p-AMPK and AMPK levels and statistical results (n = 3); (B) CCK-8 assay of cell viability (n = 4); (C) Representative DCFH-DA images and statistical results (n = 4); (D) SOD, GSH-Px, MDA, and NADPH levels in H9c2 cells (n = 4); (E) Apoptosis rate measured by flow cytometry (n = 3); (F) Western blot detection of apoptosis-related protein levels and statistical results (n = 3 or 4); (G) Representative JC-1 images and quantification of fluorescence intensity for JC-1 monomers/aggregates (n = 4); (H) ATP level (n = 4); (I) Western blot detection of UCP2 levels and statistical results (n = 3). Values are presented as the mean  $\pm$  SD. \*p < 0.05, \*\*p < 0.01. NS indicates no significant difference vs. Con group.

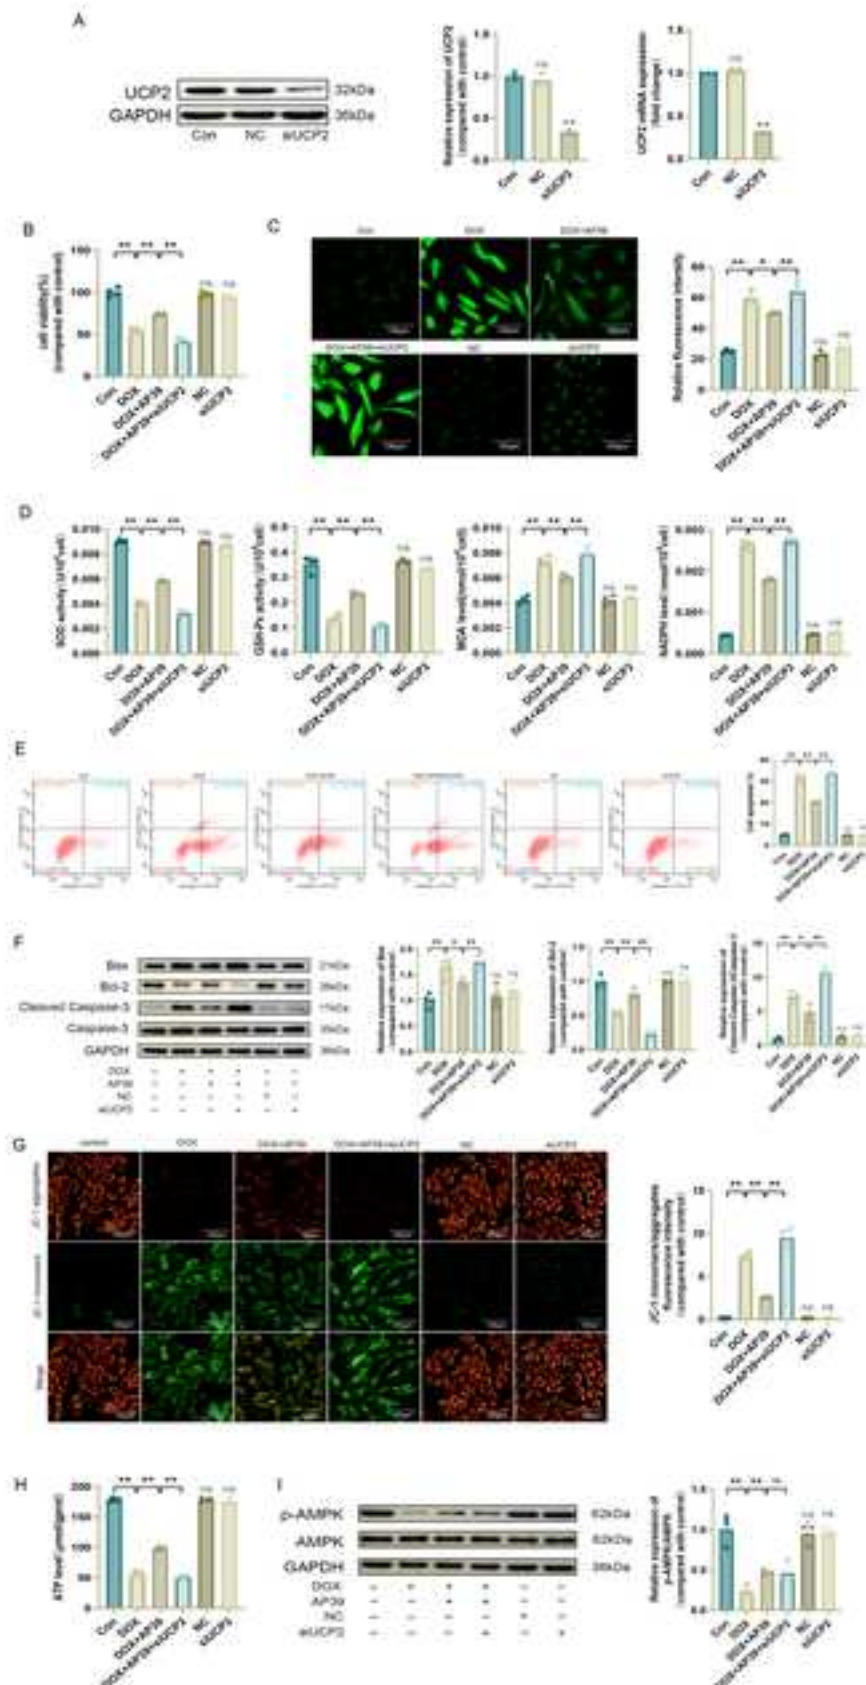

Figure 6 AP39 improves DOX-induced cardiotoxicity by preventing UCP2 down-regulation. (A) Western blot analysis of UCP2 ( $n = 4$ ) and PCR for UCP2 mRNA levels ( $n = 3$ ); (B) CCK-8 assay of cell viability ( $n = 4$ ); (C) Representative DCFH-DA images and statistical results ( $n = 4$ ); (D) SOD, GSH-Px, MDA, and NADPH levels in H9c2 cells ( $n = 4$ ); (E) Apoptosis rate measured by flow cytometry ( $n = 3$ ); (F) Western blot detection of apoptosis-related protein levels and statistical results ( $n = 3$  or 4); (G) Representative JC-1 images and quantification of fluorescence intensity for JC-1 monomers/aggregates ( $n = 4$ ); (H) ATP levels ( $n = 4$ ); (I) Western blot detection of p-AMPK and AMPK levels and statistical results ( $n = 3$ ). Values are presented as the mean  $\pm$  SD. \* $p < 0.05$ , \*\* $p < 0.01$ . NS indicates no significant difference vs. Con group.



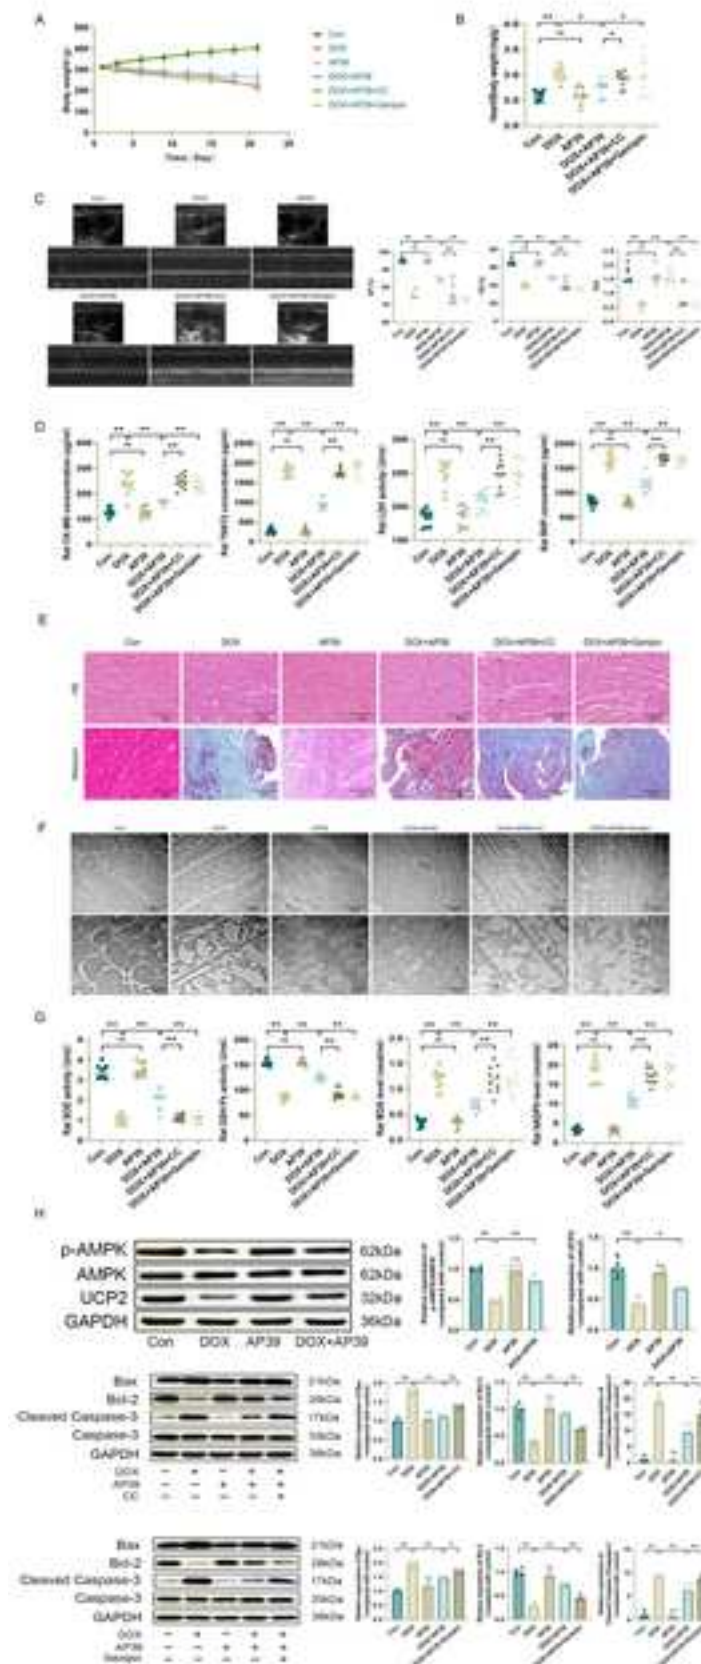

Figure 7 AP39 ameliorates DOX-induced cardiotoxicity in rats by regulating the AMPK/UCP2 pathway. (A) Body weight in different groups of rats ( $n = 10$ ). (B) Heart/body weight ratio in different groups of rats ( $n = 10$ ). (C) Representative echocardiographic images and quantitative analysis of EF, FS, and EA ( $n = 7$ ). (D) Serum TNF- $\alpha$ , CK-MB, LDH, and SRF levels in rats ( $n = 10$ ). (E) Representative HE and Masson staining images of the rat myocardium. (F) Representative images of mitochondria in rat cardiomyocytes observed by transmission electron microscopy. (G) UCP2, AMPK, and GAPDH levels in rat serum ( $n = 10$ ). (H) Western blot detection of apoptosis-related protein: p-AMPK, AMPK and UCP2 levels and statistical results ( $n = 3$  or 4). Values are presented as the mean  $\pm$  SD. \* $p < 0.05$ , \*\* $p < 0.01$ . NS indicates no significant difference vs. Con group.
